# Supplementary material
Source: PubMed Central journal article supplement (PMC8513745)

# Using (+)-Carvone to Access Novel Derivatives of (+)-*ent*-Cannabidiol (CBD): The First Asymmetric Syntheses of (+)-*ent*-CBDP and (+)-*ent*-CBDV

Alexandra E. Golliher, Antonio J. Tenorio, Nina Dimauro, Nicolas R. Mairata, F. Omar Holguin, and William A. Maio\*

## Supporting Information

Unless otherwise noted, reactions were performed in flame-dried glassware under an atmosphere of dry nitrogen. Reaction solvents (CH<sub>2</sub>Cl<sub>2</sub>, THF, and Et<sub>2</sub>O) were purified before use in a Glass Contour Solvent Purification System under a flow of dry nitrogen. All other solvents and reagents were purchased from Sigma-Aldrich and used as received, unless otherwise specified. Thin-layer chromatography (TLC) was performed using plates precoated with silica gel 60 Å F- 254 (250 μm) purchased from Silicycle and visualized by UV light, KMnO<sub>4</sub> or anisaldehyde stains, followed by heating. Silicycle SilicaFlash ® P60 silica gel (particle size 40-63 μm) or Silicycle Brand disposable columns were used for flash chromatography. <sup>1</sup>H and <sup>13</sup>C NMR spectra were recorded on a Bruker Advance 500 (operating at 500 MHz and 125 MHz, respectively), and are reported relative to residual solvent peak (δ 7.26 for <sup>1</sup>H and δ 77.0 for <sup>13</sup>C in CDCl<sub>3</sub>). Data for <sup>1</sup>H NMR spectra are reported as follows: chemical shift (δ ppm) [multiplicity, coupling constant (Hz), integration]. Spectra obtained are described using the following abbreviations: s = singlet, d = doublet, t = triplet, q = quartet, m = multiplet. IR spectra were recorded on a Perkin Elmer Spectrum One FTIR Spectrometer and samples were prepared by evaporation from CHCl<sub>3</sub> or CH<sub>2</sub>Cl<sub>2</sub> on NaCl plates. High-resolution mass spectra were obtained through positive electrospray ionization on a Q-ToF Micromass Spectrometer coupled with a Waters Acquity Ultra Performance LC.

|                                                                 |       |
|-----------------------------------------------------------------|-------|
| Experimental Procedures and Compound Characterization Data..... | 2–12  |
| <sup>1</sup> H & <sup>13</sup> C NMR Spectra.....               | 13–50 |

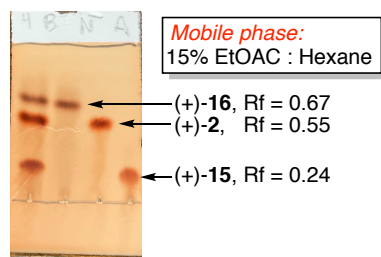

Figure ESI 1. Representative TLC Plate showing the difference in Rf values

## Experimental Procedures and Characterization Data

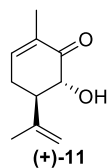

5*R*,6*R*- $\alpha$ -Hydroxy Carvone [(+)-**11**]. Was prepared according to the procedure found in *J. Med. Chem.* **2011**, *54*, 3866–3874.  $^1\text{H NMR}$  (500 MHz,  $\text{CDCl}_3$ )  $\delta$  = 6.75 (d,  $J$  = 6 Hz, 1H), 4.94 (s, 1H), 4.92 (s, 1H), 4.15 (d,  $J$  = 13 Hz, 1H), 2.70 (dt,  $J$  = 5, 11 Hz, 1H), 2.51–2.45 (m, 1H), 2.40–2.34 (m, 1H), 1.84 (s, 6H). All other data matches known literature values (*Chem. Eur. J.* **2019** *25* 2983–2988).

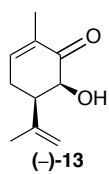

5*R*,6*S*- $\alpha$ -Hydroxy Carvone [(-)-**13**]. Was prepared according to the procedure found in *J. Med. Chem.* **2011**, *54*, 3866–3874.  $^1\text{H NMR}$  (500 MHz,  $\text{CDCl}_3$ )  $\delta$  = 6.66–6.67 (m, 1H), 4.86 (s, 1H), 4.70 (s, 1H), 4.43 (d,  $J$  = 6 Hz, 1H), 3.18–3.20 (m, 1H), 2.76–2.71 (m, 1H), 2.55–2.50 (m, 1H), 1.83 (s, 3H), 1.69 (s, 3H). All other data matches known literature values (*Chem. Eur. J.* **2019** *25* 2983–2988).

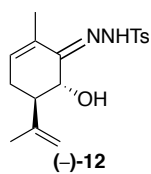

Tosylhydrazone (–)-**12**. Hydroxycarvone (+)-**11** (0.743 g, 4.47 mmol, 1.0 equiv.) was added to a 250 mL round bottom flask and dissolved in  $\text{CH}_2\text{Cl}_2$  (55 mL). To this solution, tosylhydrazide (0.998 g, 5.36 mmol, 1.2 equiv.) was added in a single portion followed by the drop wise addition of acetic acid (0.17 mL, 3.13 mmol, 0.7 equiv.) and concentrated hydrochloric acid (0.1 mL, 4.08 mmol, 0.9 equiv.). The solution was then heated to reflux (40 °C) and allowed to stir for 48h. After the disappearance of starting material was noted *via* TLC analysis, the reaction mixture was quenched by the addition of a 1N aqueous solution of HCl (50 mL) and transferred to a separatory funnel where the aqueous layer was washed with  $\text{CH}_2\text{Cl}_2$  (ca. 3x 50 mL). The combined organic layers were then washed with a saturated aqueous solution of  $\text{NaHCO}_3$  (ca. 50 mL), followed by brine (ca. 50 mL) before being dried over  $\text{MgSO}_4$ , filtered, and concentrated *in vacuo*. The crude product was purified *via* flash column chromatography (15% EtOAc / 85% Hexanes to 30% EtOAc / 70% Hexanes) to

afford the desired product (–)-**12** (1.100 g, 74% yield) as a thick yellow foam:  $[\alpha]_D^{23} = -90.9$  ( $c = 0.4$ ,  $\text{CHCl}_3$ );  $^1\text{H NMR}$  (500 MHz,  $\text{CDCl}_3$ )  $\delta = 10.30$  (br. s, 1H), 7.84 (d,  $J = 8\text{ Hz}$ , 2H), 7.29 (d,  $J = 8\text{ Hz}$ ), 5.97 (br. d, 1H), 5.02 (s, 1H), 4.91 (s, 1H), 4.44 (d,  $J = 11\text{ Hz}$ , 1H), 2.43–2.51 (m, 1H), 2.42 (s, 3H), 2.13–2.17 (m, 2H), 1.79 (s, 3H), 1.72 (s, 3H);  $^{13}\text{C NMR}$  (125 MHz,  $\text{CDCl}_3$ ) 149.5, 143.6, 143.3, 135.8, 133.1, 131.0, 129.4, 127.9, 115.5, 70.5, 51.1, 28.3, 21.6, 18.8, 18.1; IR (neat, thin film) 3470, 3194, 2922, 2857, 1646, 1597, 1450, 1328, 1169, 1030  $\text{cm}^{-1}$ ; HRMS (ESI)  $m/z$ :  $[\text{M}+\text{Na}]^+$  calc'd for  $\text{C}_{17}\text{H}_{22}\text{O}_3\text{N}_2\text{SNa}$  357.1248; found 357.1241  $m/z$ .

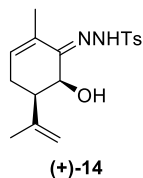

Tosylhydrazone (+)-**14**. Was prepared in a similar manner to tosylhydrazone (–)-**12**. The crude product was purified via flash column chromatography (15% EtOAc / 85% Hexanes to 30% EtOAc / 70% Hexanes) to afford the desired product (+)-**14** (70% yield) as a thick yellow foam:  $[\alpha]_D^{23} = +52.7$  ( $c = 2.0$ ,  $\text{CHCl}_3$ );  $^1\text{H NMR}$  (500 MHz,  $\text{CDCl}_3$ )  $\delta = 8.40$  (br., 1H), 7.85 (d,  $J = 8\text{ Hz}$ , 2H), 7.29 (d,  $J = 8\text{ Hz}$ , 2H), 6.08–6.11 (m, 1H), 5.11 (s, 1H), 4.86 (s, 1H), 4.64 (s, 1H), 2.41 (s, 3H), 2.31–2.37 (m, 1H), 2.00–2.05 (m, 2H), 1.83 (s, 3H), 1.79 (s, 3H).  $^{13}\text{C NMR}$  (125 MHz,  $\text{CDCl}_3$ ) 153.8, 143.9, 143.3, 135.1, 134.0, 131.0, 129.3, 128.0, 113.6, 62.2, 45.6, 23.9, 22.3, 21.5, 17.4; IR (neat, thin film) 3463 (br.), 3187 (br.), 2975, 2922, 1643, 1598, 1165, 1030  $\text{cm}^{-1}$ ; HRMS (ESI)  $m/z$ :  $[\text{M}+\text{Na}]^+$  calc'd for  $\text{C}_{17}\text{H}_{22}\text{O}_3\text{N}_2\text{SNa}$  357.1248; found 357.1235  $m/z$ .

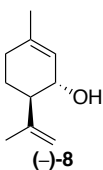

1*S*-(–)-Isopiperitenol [(–)-**8**]. Tosylhydrazone (–)-**12** (0.053 g, 0.158 mmol, 1.0 equiv.) was added to a flame dried 25 mL round bottom flask and dissolved in  $\text{CH}_2\text{Cl}_2$  (3 mL). To this solution at 0 °C was added catecholborane (0.037 mL, 0.347 mmol, 2.2 equiv.) drop wise over the course of 2 min. After the addition was complete, the reaction mixture was allowed to stir for 1 h before  $\text{NaOAc}\cdot\text{XH}_2\text{O}$  (0.078 g, 0.573 mmol, 3.6 equiv.) was added in a single portion. After an additional 1 h of stirring, a reflux condenser was attached and the mixture was heated to reflux (40 °C) overnight. After the disappearance of starting material was noted *via* TLC analysis, the reaction mixture was passed over a pad a celite and concentrated *in vacuo*. The crude product was purified *via* flash column chromatography (5% EtOAc / 95% Hexanes to 15% EtOAc / 85% Hexanes) to afford the desired product (–)-**8** (0.021 g, 88% yield) as a light yellow oil:  $^1\text{H NMR}$  (500 MHz,  $\text{CDCl}_3$ )  $\delta = 5.44$  (s, 1H), 4.89 (s, 1H), 4.85 (s, 1H), 4.11 (d,  $J = 8.5\text{ Hz}$ , 1H), 2.05–2.09 (m, 2H), 1.93 (dd,  $J = 4.5, 17.5\text{ Hz}$ , 1H), 1.73 (s, 3H), 1.69 (s, 3H), 1.56–1.64 (ddd,  $J = 5.5, 12, 24.5\text{ Hz}$ , 2H). All other data matches known literature values (*J. Nat. Prod.* **2018** *81*, 1546–1552).

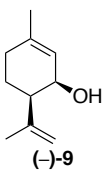

1*R*-(+)-Isopiperitenol [(-)-**9**]. Was prepared in a similar manner to (-)-**8**. The crude product was purified via flash column chromatography (15% EtOAc / 85% Hexanes) to afford the desired product (-)-**9** (65% yield) as a light yellow oil: <sup>1</sup>H NMR (500 MHz, CDCl<sub>3</sub>) δ = 5.67-5.68 (m, 1H), 5.00 (s, 1H), 4.81 (s, 1H), 4.13 (br. s, 1H), 2.09-2.12 (m, 1H), 2.01-2.05 (m, 2H), 1.83 (s, 3H), 1.78-1.75 (m, 1H), 1.72 (s, 3H), 1.60-1.55 (m, 1H), 1.48 (d, *J* = 3.5 Hz, 1H). All other data matches known literature values (*J. Nat. Prod.* **2018** *81*, 1546–1552).

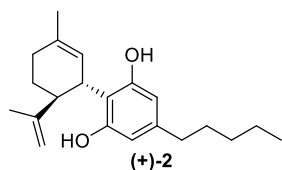

(+)-*ent*-CBD [(+)-**2**]. Basic alumina (0.920 g, 9.032 mmol, 25.0 equiv.) was added to a flame dried 10 mL roundbottom flask and suspended with CH<sub>2</sub>Cl<sub>2</sub> (1.5 mL). A reflux condenser was attached to the flask before BF<sub>3</sub>•OEt<sub>2</sub> (0.133 mL, 1.083 mmol, 3.0 equiv.) was added drop wise through the top of the condenser. After being allowed to stir 15 min, the flask was lowered into a pre-heated oil bath and the contents of the flask were boiled for ca. 1 min. To this solution, was added a solution of olivetol (**10**, 0.078 g, 0.433 mmol, 1.2 equiv.) and 1*S*-(-)-Isopiperitenol [(-)-**8**, 0.055 g, 0.361 mmol, 1.0 equiv.] in CH<sub>2</sub>Cl<sub>2</sub> (1.5 mL) as quickly as possible *via* cannula. After 10 sec, the reaction was quenched by the addition of 2 mL of a saturated aqueous solution of NaHCO<sub>3</sub>. After cooling to room temperature, the contents of the flask were passed over a pad of celite before being added to a separatory funnel and extracted using CH<sub>2</sub>Cl<sub>2</sub> (ca. 10 mL). The combined organic layers were then washed with brine (ca. 20 mL) before being dried over MgSO<sub>4</sub>, filtered, and concentrated *in vacuo*. The crude product was purified *via* flash column chromatography (10% EtOAc / 90% Hexanes to 30% EtOAc / 70% Hexanes) to afford the desired product (+)-**2** (0.0245 g, 22% yield) as an amorphous white solid. Characterization data for (+)-**2** (known): [α]<sub>D</sub><sup>23</sup> = +93.4 (c = 0.5, EtOH), {lit. [α]<sub>D</sub><sup>23</sup> = +90 (c = 3, EtOH)} ; <sup>1</sup>H NMR (500 MHz, CDCl<sub>3</sub>) δ = 6.27 (br. s, 1H), 6.17 (br. s, 1H), 5.97 (br. s, 1H), 5.57 (s, 1H), 4.69 (br. s, 1H), 4.66 (s, 1H), 4.56 (s, 1H), 3.85 (br. d, *J* = 8.5 Hz), 2.44 (t, *J* = 8 Hz, 2H), 2.40 (dt, *J* = 3, 11 Hz, 1H), 2.20-2.26 (m, 1H), 2.07-2.12 (m, 1H), 1.79 (s, 3H), 1.76-1.84 (m, 2H), 1.65 (s, 3H), 1.53-1.59 (m, 2H), 1.25-1.32 (m, 4H), 0.88 (t, *J* = 7 Hz, 3H). All other data matches known literature values (*Org. Biomol. Chem.* **2005**, *3*, 1116–1123).

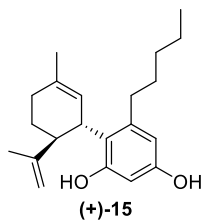

Isolated as a by-product from the reaction of (-)-**8** and **10** shown above was the abnormal regioisomer (+)-**15** (0.0145 g, 13% yield) as an amorphous white solid. Characterization data for (+)-**15** : [α]<sub>D</sub><sup>23</sup> = +68.76 (c = 0.40 CHCl<sub>3</sub>) ; <sup>1</sup>H NMR (500 MHz, CDCl<sub>3</sub>) δ = 6.20 (s, 1H), 6.19 (s, 1H), 6.05 (br. s, 1H), 5.52 (s, 1H), 4.64 (s, 1H), 4.45 (s, 1H), 3.52 (br. d, *J* = 8.5 Hz, 1H), 2.55-2.61 (m, 1H), 2.44-2.49 (m, 1H), 2.21-2.28 (m, 2H), 2.06-2.11 (m, 1H), 1.72-1.86 (m, 2H), 1.78 (s, 3H), 1.53 (s, 3H), 1.44-1.48 (m, 2H), 1.25-1.34 (m, 4H), 0.89 (t, *J* = 7 Hz, 3H) ; <sup>13</sup>C NMR (125

MHz, CDCl<sub>3</sub>)  $\delta$  = 156.6, 154.6, 147.7, 144.1, 139.9, 124.8, 120.1, 111.5, 108.6, 102.2, 45.1, 40.1, 34.1, 32.0, 31.2, 30.4, 28.2, 23.8, 22.7, 21.4, 14.2 ; IR (neat, thin film) 3429 (br.), 2857-2957, 1620, 1596, 1448, 1133, 1149, 1009, 894, 842 cm<sup>-1</sup> ; HRMS (ESI) m/z: [M+H]<sup>+</sup> calc'd for C<sub>21</sub>H<sub>31</sub>O<sub>2</sub> 315.2326; found 315.2336 m/z.

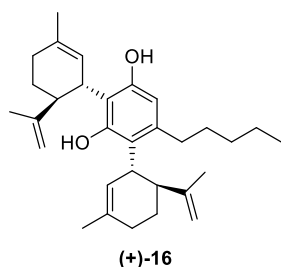

Isolated as a by-product from the reaction of (-)-**8** and **10** shown above was the *bis*-CBD isomer (+)-**16** as an amorphous white solid. Characterization data for (+)-*bis*-CBD (0.0079g, 5% yield) [ $\alpha$ ]<sub>D</sub><sup>23</sup> = +131.5 (c = 0.04 CHCl<sub>3</sub>); <sup>1</sup>H NMR (500 MHz, CDCl<sub>3</sub>)  $\delta$  = 6.20 (s, 1H), 5.92 (s, 1H), 5.78 (s, 1H), 5.58 (s, 1H), 5.48 (s, 1H), 4.59 (s, 1H), 4.49 (s, 1H), 4.44 (s, 1H), 4.42 (s, 1H), 4.00 (br. d, J = 6.5 Hz, 1H), 3.49 (br. d, J = 7.5 Hz, 1H), 2.50-2.56 (m, 1H), 2.41-2.46 (m, 2H), 2.18-2.23 (m, 3H), 2.04-2.10 (m, 2H), 1.78 (s, 3H), 1.76 (s, 3H), 1.70 (s, 3H), 1.50-1.65 (m, 2H), 1.49 (s, 3H), 1.43-1.47 (m, 2H), 1.22-1.33 (m, 6H), 0.88 (t, J = 7 Hz, 3H) ; <sup>13</sup>C NMR (125 MHz, CDCl<sub>3</sub>)  $\delta$  = 156.4, 154.7, 147.6, 143.9, 139.7, 132.1, 131.9, 128.5, 128.4, 124.7, 119.8, 115.2, 111.3, 108.5, 102.1, 44.9, 40.0, 33.9, 33.9, 31.9, 31.8, 31.1, 30.4, 30.2, 29.6, 28.1, 23.6, 23.6, 22.5, 21.4, 21.3, 14.0 ; IR (neat, thin film) 3438 (br.), 2854-2959, 1645, 1578-1617, 1435, 1378, 1261, 887 cm<sup>-1</sup> ; HRMS (ESI) m/z: [M+H]<sup>+</sup> calc'd for C<sub>31</sub>H<sub>45</sub>O<sub>2</sub> 449.3421; found 449.3420 m/z.

**Note:** By using this same procedure, substituting 1*S*-(-)-isopiperitenol with 1*R*-(-)-isopiperitenol (-)-**9** (0.050 g, 0.328 mmol), one can also obtain (+)-*ent*-CBD (+)-**2** (0.024 g, 23% yield), (+)-*abn*-CBD (+)-**15** (0.009 g, 9% yield) and (+)-*bis*-CBD (+)-**16** (0.008 g, 5% yield).

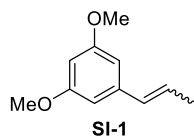

1,3-dimethoxy-5-(prop-1-en-1-yl)benzene (**SI-1**). Ethyltriphenylphosphonium bromide (1.00 g, 2.69 mmol, 1.00 equiv., Sigma Aldrich) was added to a flame dried 100 mL round bottom flask and suspended in THF (20 mL). To this suspension at 0 °C was added *n*-Butyl lithium (1.38 mL, 2.96 mmol, 2.14 M in hexanes, 1.1 equiv.) drop wise over the course of ca. 2 min. After the addition was complete, the orange / red ylide solution was allowed to stir for an additional 30 min at 0 °C before 3,5-dimethoxybenzaldehyde (0.49 g, 2.96 mmol, 1.1 equiv.) in THF (5 mL) was added drop wise *via* cannula. The reaction mixture was then allowed to warm to rt and stir overnight before being quenched with brine (ca. 25 mL), added to a separatory funnel and extracted using EtOAc (ca. 3x 25 mL). The combined organic layers were then concentrated *in vacuo*, dissolved in hexanes (ca. 25 mL) and filtered over a pad of celite to remove the triphenylphosphine oxide byproduct (*note*: it may be advantageous to repeat this operation several times to remove most of the Ph<sub>3</sub>P=O). After

concentration, the crude product was purified *via* flash column chromatography (10% EtOAc / 90% Hexanes to 20% EtOAc / 80% Hexanes) to afford the desired product **SI-1** (0.3944 g, 82% yield) as an 1:1 inseparable mixture of alkene isomers that was taken directly on to the next step without extensive characterization. <sup>1</sup>H NMR (500 MHz, CDCl<sub>3</sub>) δ = 6.47 (d, *J* = 19.5 Hz, 2H), 6.37 (d, *J* = 13.5 Hz, 1H), 6.32-6.34 (m, 1H), *Z* alkene proton 6.25 (dq, *J* = 6.5 15.5 Hz, 1H) or *E* proton alkene 5.81 (dq, *J* = 7, 11.5 Hz, 1H), 3.79 (s, 6H), 1.89 (dd, *J* = 7, 16 Hz, 3H). All other data matches known literature values (*Tetrahedron Lett.*, **2015**, 56, 5106–5111).

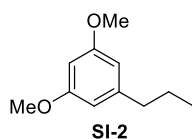

1,3-dimethoxy-5-propylbenzene (**SI-2**). An 10 mL round bottom flask was charged with alkene isomers **SI-1** (0.745 g, 4.179 mmol, 1.0 equiv.), EtOAc (5 mL), and 5% palladium on carbon (ca. 0.100 g). A fresh septum was placed over the flask, which was then evacuated using a vacuum pump, replacing the inner atmosphere with a blanket of H<sub>2</sub> using a balloon (*note*: this step was repeated several times to ensure all of the air had been replaced by H<sub>2</sub>). After being allowed to stir 2 h, the crude product was passed over a bed of celite and concentrated *in vacuo* to afford the desired product **SI-2** (0.736 g, 98% yield) as a slight yellow oil in sufficient enough purity to use in the next step without further purification. <sup>1</sup>H NMR (500 MHz, CDCl<sub>3</sub>) δ = 6.34 (s, 2H), 6.30 (s, 1H), 3.78 (s, 6H), 2.53 (t, *J* = 7.5 Hz, 2H), 1.63 (q, *J* = 7.5 Hz, 2H), 0.94 (t, *J* = 7 Hz, 3H). All other data matches known literature values (*J. Org. Chem.* **1997**, 62, 417–421).

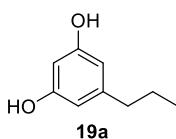

5-propylbenzene-1,3-diol (**19a**). In a 100 mL round bottom flask, open to the atmosphere was added the crude product **SI-2** (0.736 g, 4.08 mmol, 1.0 equiv.) and a 1:1 mixture of glacial acetic acid (20 mL, 349.7 mmol, 17.4 M) and hydrobromic acid (48% in H<sub>2</sub>O, 20 mL, 368.3 mmol, 18.4 M). The reaction mixture was refluxed at 125 °C for 3 hours while stirring, or until the starting material was consumed via TLC analysis. At this point, the reaction was allowed to cool to room temperature and quenched by the addition of DI H<sub>2</sub>O. The biphasic solution was added to a separatory funnel, wherein the organic portion was extracted Et<sub>2</sub>O (ca. 3x 20 mL). The organic layers were then combined, neutralized with a concentrated sodium bicarbonate solution (ca. 30 mL), washed with a saturated brine solution (ca. 50 mL), dried over MgSO<sub>4</sub>, filtered, and concentrated *in vacuo* to afford the final product without purification (0.609 g, 99% yield) as a pale yellow oil. <sup>1</sup>H NMR (500 MHz, CDCl<sub>3</sub>) δ = 6.24 (s, 2H), 6.17 (s, 1H), 4.63 (br. s, 2H), 2.47 (t, *J* = 7.5 Hz, 2H), 1.60 (q, *J* = 7.5 Hz, 2H), 0.93 (t, *J* = 7.5 Hz, 3H). All other data matches known literature values (*J. Org. Chem.* **1997**, 62, 417–421).

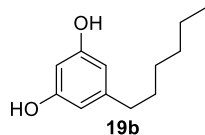

5-hexylbenzene-1,3-diol (**19b**). Was prepared in a similar manner to **19a** by substituting ethyltriphenylphosphonium bromide with pentyltriphenylphosphonium bromide (0.153 g, 0.372 mmol, 1.0 equiv.). After three steps, the crude product was purified *via* flash column chromatography (15% EtOAc / 85% Hexanes) to afford the desired product **19b** (0.0617 g, 85% yield) as a light yellow oil:  $^1\text{H NMR}$  (500 MHz,  $\text{CDCl}_3$ )  $\delta$  = 6.24 (s, 2H), 6.18 (s, 1H), 4.70 (br. s, 2H), 2.44 (t,  $J$  = 7.5 Hz, 2H), 1.50-1.54 (m, 2H), 1.24-1.31 (m, 6H), 0.86 (t,  $J$  = 7 Hz, 3H). All other data matches known literature values (*Chem. Pharm. Bull.* **1989**, 37, 2431–2434).

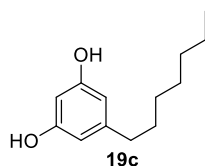

5-heptylbenzene-1,3-diol (**19c**). Was prepared in a similar manner to **19a** by substituting ethyltriphenylphosphonium bromide with hexyltriphenylphosphonium bromide (2.00 g, 4.68 mmol, 1.0 equiv.). After three steps, the crude product was purified *via* flash column chromatography (15% EtOAc / 85% Hexanes) to afford the desired product **19c** (0.386 g, 96% yield) as a light yellow oil:  $^1\text{H NMR}$  (500 MHz,  $\text{CDCl}_3$ )  $\delta$  = 6.24 (s, 2H), 6.17 (s, 1H), 4.64 (br. s, 2H), 2.48 (t,  $J$  = 8 Hz, 2H), 1.20-1.30 (m, 10H), 0.88 (t,  $J$  = 6.5 Hz, 3H). All other data matches known literature values (*Chem. Pharm. Bull.* **1989**, 37, 2431–2434)..

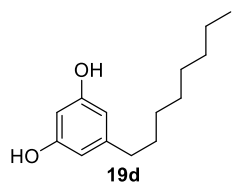

5-octylbenzene-1,3-diol (**19d**). Was prepared in a similar manner to **19a** by substituting ethyltriphenylphosphonium bromide with heptyltriphenylphosphonium bromide (0.132 g, 0.299 mmol, 1.0 equiv.). After three steps, the crude product was purified *via* flash column chromatography (15% EtOAc / 85% Hexanes) to afford the desired product **19d** (0.0385 g, 58% yield) as a light yellow oil:  $^1\text{H NMR}$  (500 MHz,  $\text{CDCl}_3$ )  $\delta$  = 6.24 (s, 2H), 6.17 (s, 1H), 2.48 (t,  $J$  = 8 Hz, 2H), 1.24-1.31 (m, 12H), 0.88 (t,  $J$  = 7 Hz, 3H). All other data matches known literature values (*J. Exp. Bot.* **2007**, 58, 3262–3272).

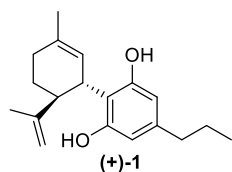

(+)-*ent*-CBDV [(+)-**1**]. Was prepared in a similar manner to (+)-*ent*-CBD [(+)-**2**] by substituting olivetol (**10**) with 5-propylbenzene-1,3-diol (**19a**, 0.059 g, 0.394 mmol, 1.2 equiv.). The crude product was purified *via* flash column chromatography (10% EtOAc / 90% Hexanes to 30% EtOAc / 70% Hexanes) to afford the desired product (+)-**1** (0.0349 g, 37% yield) as an amorphous white solid. Characterization data for (+)-**1**:  $[\alpha]_D^{23}$  = +64.0 (c = 1.9,  $\text{CHCl}_3$ ) {lit. for (–)-CBDV:  $[\alpha]_D^{23}$  = –139.5 (c = 0.4,  $\text{CHCl}_3$ ) *Tetrahedron Lett.* **1969**, (3), 145–147} ;  $^1\text{H NMR}$  (500 MHz,  $\text{CDCl}_3$ )  $\delta$  = 6.28 (br. s, 1H), 6.16 (br. s, 1H), 5.99 (br. s, 1H), 5.57 (s, 1H), 4.72 (br. s, 1H), 4.65

(s, 1H), 4.55 (s, 1H), 3.85 (br. d,  $J = 10$  Hz, 1H), 2.42 (t,  $J = 7.5$  Hz, 2H), 2.36-2.38 (m, 1H), 2.10-2.26 (m, 1H), 2.07-2.11 (m, 1H), 1.79 (s, 3H), 1.73-1.83 (m, 2H), 1.65 (s, 3H), 1.58 (q,  $J = 7.5$  Hz, 2H), 0.90 (t,  $J = 7$  Hz, 3H);  $^{13}\text{C}$  NMR (125 MHz,  $\text{CDCl}_3$ )  $\delta = 149.5, 142.8, 140.2, 124.2, 123.8, 113.9, 110.9, 107.7, 46.2, 37.7, 37.3, 30.5, 28.5, 24.1, 23.8, 20.6, 13.9$ ; IR (neat, thin film) 3435 (br.), 2865-2965, 1629, 1582, 1448  $\text{cm}^{-1}$ ; HRMS (ESI)  $m/z$ :  $[\text{M}+\text{K}]^+$  calc'd for  $\text{C}_{19}\text{H}_{26}\text{O}_2\text{K}$  325.2916; found 325.1598  $m/z$ .

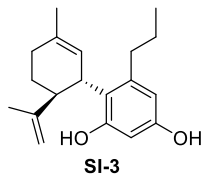

Isolated as a by-product from the reaction of (–)-**8** and **19a** shown above was the abnormal regioisomer (+)-*abn*-CBDV (**SI-3**, 0.0169 g, 18% yield) as an amorphous white solid. Characterization data for (+)-**SI-3**:  $[\alpha]_D^{23} = +82.2$  ( $c = 0.25$ ,  $\text{CHCl}_3$ );  $^1\text{H}$  NMR (500 MHz,  $\text{CDCl}_3$ )  $\delta = 6.20$  (s, 1H), 6.19 (s, 1H), 6.04 (s, 1H), 5.52 (s, 1H), 4.64 (s, 1H), 4.45 (s, 1H), 3.53 (d,  $J = 8.5$  Hz, 1H), 2.52-2.61 (m, 1H), 2.45-2.50 (m, 1H), 2.21-2.27 (m, 2H), 2.06-2.11 (m, 1H), 1.78 (s, 3H), 1.74-1.85 (m, 2H), 1.53 (s, 3H), 1.44-1.51 (m, 2H), 0.92 (t,  $J = 7$  Hz, 3H);  $^{13}\text{C}$  NMR (125 MHz,  $\text{CDCl}_3$ )  $\delta = 156.6, 154.6, 147.7, 143.8, 139.9, 124.8, 120.1, 111.5, 108.7, 102.2, 45.1, 40.1, 36.2, 30.4, 28.2, 24.6, 23.8, 21.4, 14.3$ ; IR (neat, thin film) 3414 (br.), 2870-2963, 1625, 1596, 1448, 1150, 1002, 887, 844  $\text{cm}^{-1}$ ; HRMS (ESI)  $m/z$ :  $[\text{M}+\text{Na}]^+$  calc'd for  $\text{C}_{19}\text{H}_{26}\text{O}_2\text{Na}$  309.1830; found 309.1824  $m/z$ .

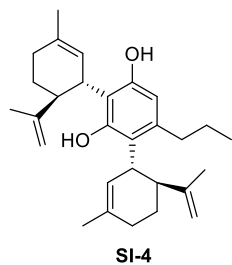

Isolated as a by-product from the reaction of (–)-**8** and **19a** shown above was the *bis* isomer **SI-4** as an amorphous white solid. Characterization data for (+)-*bis*-CBDV (**SI-4**, 0.0172g, 12% yield)  $[\alpha]_D^{23} = +101.07$  ( $c = 0.2$ ,  $\text{CHCl}_3$ );  $^1\text{H}$  NMR (500 MHz,  $\text{CDCl}_3$ )  $\delta = 6.20$  (s, 1H), 5.91 (s, 1H), 5.77 (s, 1H), 5.58 (s, 1H), 5.48 (s, 1H), 4.60 (s, 1H), 4.50 (s, 1H), 4.45 (s, 1H), 4.42 (s, 1H), 4.00 (br d,  $J = 9$  Hz, 1H), 3.50 (br d,  $J = 8$  Hz, 1H), 2.50-2.56 (m, 1H), 2.40-2.48 (m, 2H), 2.05-2.25 (m, 7H), 1.78 (s, 3H), 1.76 (s, 3H), 1.70 (s, 3H), 1.63-1.67 (m, 2H), 1.52-1.56 (m, 2H), 1.49 (s, 3H), 0.91 (t,  $J = 7.5$  Hz, 3H);  $^{13}\text{C}$  NMR (125 MHz,  $\text{CDCl}_3$ ) 154.1, 153.8, 148.0, 147.7, 141.1, 139.8, 139.2, 125.1, 125.0, 119.2, 115.4, 111.5, 111.4, 109.6, 46.7, 44.5, 40.6, 36.2, 35.8, 30.6, 30.5, 28.6, 28.5, 24.6, 23.7, 23.6, 21.6, 19.0, 14.4; IR (neat, thin film) 3441 (br.), 2832-2962, 1645, 1622, 1581, 1432  $\text{cm}^{-1}$ ; HRMS (ESI)  $m/z$ :  $[\text{M}]^+$  calc'd for  $\text{C}_{29}\text{H}_{41}\text{O}_2$  421.3108; found 421.3116  $m/z$ .

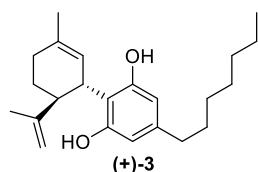

(+)-*ent*-CBDP [(+)-**3**]. Was prepared in a similar manner to (+)-*ent*-CBD [(+)-**2**] by substituting olivetol (**10**) with 5-heptylbenzene-1,3-diol (**19c**, 0.0782 g, 0.375 mmol, 1.2 equiv.). The crude product was purified *via* flash column chromatography (10% EtOAc / 90% Hexanes to 30% EtOAc / 70%



Hexanes) to afford the desired product (+)-**3** (0.0232 g, 22% yield) as an amorphous white solid. Characterization data for (+)-**3**:  $[\alpha]_D^{23} = +126.0$  ( $c = 0.02$ , MeCN) {lit. for (-)-CBDP:  $[\alpha]_D^{23} = -146.0$  ( $c = 1.0$ , MeCN) *Scientific Reports*, **2019**, *9*, 20335} ;  $^1\text{H NMR}$  (500 MHz,  $\text{CDCl}_3$ )  $\delta = 6.28$  (br. s, 1H), 6.16 (br. s, 1H), 5.97 (br. s, 1H), 5.56 (s, 1H), 4.66 (s, 1H), 4.59 (br. s, 1H), 4.55 (s, 1H), 3.84 (br. d,  $J = 8.5$  Hz, 1H), 2.43 (t,  $J = 8$  Hz, 2H), 2.39 (dt,  $J = 5, 10.5$  Hz, 1H), 2.19-2.26 (m, 1H), 2.06-2.12 (m, 1H), 1.79 (s, 3H), 1.72-1.83 (m, 2H), 1.65 (s, 3H), 1.52-1.57 (m, 3H), 1.24-1.29 (m, 7H), 0.87 (t,  $J = 7$  Hz, 3H) ;  $^{13}\text{C NMR}$  (125 MHz,  $\text{CDCl}_3$ )  $\delta = 156.2, 153.9, 149.5, 143.1, 140.2, 124.2, 113.8, 110.9, 109.9, 108.1, 46.2, 37.4, 35.6, 31.9, 31.1, 30.5, 29.4, 29.3, 28.5, 23.8, 22.8, 20.6, 14.2$  ; IR (neat, thin film) 3433 (br.), 2855-2958, 1629, 1584, 1443  $\text{cm}^{-1}$  ; HRMS (ESI)  $m/z$ :  $[\text{M}]^+$  calc'd for  $\text{C}_{23}\text{H}_{35}\text{O}_2$  343.2639; found 343.2639  $m/z$ .

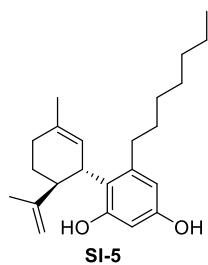

Isolated as a by-product from the reaction of (-)-**8** and **19c** shown above was the abnormal regioisomer (+)-*abn*-CBDP (**SI-5**, 0.0066 g, 6% yield) as an amorphous white solid. Characterization data for (+)-**SI-5**:  $[\alpha]_D^{23} = +81.7$  ( $c = 0.1$ ,  $\text{CHCl}_3$ ) ;  $^1\text{H NMR}$  (500 MHz,  $\text{CDCl}_3$ )  $\delta = 6.20$  (s, 1H), 6.19 (s, 1H), 6.04 (s, 1H), 5.52 (s, 1H), 4.64 (s, 1H), 4.45 (s, 1H), 3.52 (br. d,  $J = 10$  Hz, 1H), 2.55-2.61 (m, 1H), 2.44-2.49 (m, 1H), 2.19-2.28 (m, 2H), 2.06-2.12 (m, 1H), 1.78 (s, 3H), 1.72-1.85 (m, 2H), 1.53 (s, 3H), 1.43-1.48 (m, 2H), 1.25-1.30 (m, 8H), 0.88 (t,  $J = 7.5$  Hz, 3H) ;  $^{13}\text{C NMR}$  (125 MHz,  $\text{CDCl}_3$ )  $\delta = 156.6, 154.6, 147.7, 144.1, 139.9, 124.8, 120.1, 111.5, 108.6, 102.2, 45.1, 40.1, 34.1, 31.9, 31.5, 30.4, 29.8, 29.3, 28.2, 23.8, 22.8, 21.4, 14.2$  ; IR (neat, thin film) 3439 (br.), 2855-2959, 1628, 1590, 1443, 1149, 1133  $\text{cm}^{-1}$  ; HRMS (ESI)  $m/z$ :  $[\text{M}+\text{Na}]^+$  calc'd for  $\text{C}_{23}\text{H}_{34}\text{O}_2\text{Na}$  365.2456; found 365.2459  $m/z$ .

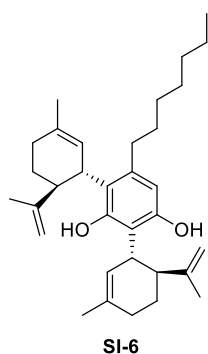

Isolated as a by-product from the reaction of (-)-**8** and **19c** shown above was the *bis* isomer **SI-6** as an amorphous white solid. Characterization data for (+)-*bis*-CBDP (**SI-6**, 0.0162 g, 11% yield):  $[\alpha]_D^{23} = +95.68$  ( $c = 0.2$ ,  $\text{CHCl}_3$ ) ;  $^1\text{H NMR}$  (500 MHz,  $\text{CDCl}_3$ )  $\delta = 6.20$  (s, 1H), 5.92 (s, 1H), 5.77 (s, 1H), 5.58 (s, 1H), 5.48 (s, 1H), 4.60 (s, 1H), 4.50 (s, 1H), 4.45 (s, 1H), 4.42 (s, 1H), 4.00 (br. d,  $J = 7$  Hz, 1H), 3.49 (br. d,  $J = 9$  Hz, 1H), 2.53 (quint.,  $J = 8$  Hz, 1H), 2.39-2.47 (m, 2H), 2.18-2.25 (m, 3H), 2.04-2.10 (m, 2H), 1.78 (s, 3H), 1.76 (s, 3H), 1.70 (s, 3H), 1.49 (s, 3H), 1.42-1.56 (m, 5H), 1.23-1.30 (m, 9H), 0.87 (t,  $J = 7$  Hz, 3H) ;  $^{13}\text{C NMR}$  (125 MHz,  $\text{CDCl}_3$ )  $\delta = 154.1, 153.8, 148.0, 147.7, 141.3, 139.8, 139.2, 125.1, 124.9, 119.1, 115.4, 111.4, 111.3, 109.5, 46.7, 44.4, 40.6, 35.8, 34.1, 31.9, 31.6, 30.6, 30.5, 29.9, 29.3, 28.6, 28.5, 23.8, 23.7, 22.8, 21.6, 19.0, 14.2$  ; IR (neat, thin film) 3441 (br.), 3073, 2830-2962, 1624, 1577, 1434, 1376, 1260, 888  $\text{cm}^{-1}$  ; HRMS (ESI)  $m/z$ :  $[\text{M}+\text{Na}]^+$  calc'd for  $\text{C}_{33}\text{H}_{48}\text{O}_2\text{Na}$  499.3551; found 499.3536  $m/z$ .

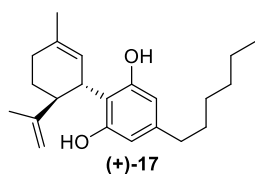

(+)-*ent*-CBD-Hex [(+)-**17**]. Was prepared in a similar manner to (+)-*ent*-CBD [(+)-**2**] by substituting olivetol (**10**) with 5-hexylbenzene-1,3-diol (**19b**, 0.061 g, 0.313 mmol, 1.0 equiv.). The crude product was purified *via* flash column chromatography (10% EtOAc / 90% Hexanes to 30% EtOAc / 70% Hexanes) to afford the desired product (+)-**17** (0.036 g, 35% yield) as an amorphous white solid. Characterization data for (+)-**17**:  $[\alpha]_D^{23} = +66.86$  ( $c = 0.3$ ,  $\text{CHCl}_3$ );  $^1\text{H NMR}$  (500 MHz,  $\text{CDCl}_3$ )  $\delta = 6.28$  (br. s, 1H), 6.16 (br. s, 1H), 5.98 (br. s, 1H), 5.57 (s, 1H), 4.69 (br. s, 1H), 4.66 (s, 1H), 4.55 (s, 1H), 3.85 (br. d,  $J = 10$  Hz, 1H), 2.43 (t,  $J = 8$  Hz, 2H), 2.36-2.40 (m, 1H), 2.07-2.26 (m, 2H), 1.79 (s, 3H), 1.71-1.82 (m, 2H), 1.65 (s, 3H), 1.53-1.57 (m, 2H), 1.25-1.30 (m, 6H), 0.86-0.89 (m, 3H);  $^{13}\text{C NMR}$  (125 MHz,  $\text{CDCl}_3$ )  $\delta = 154.7$ , 154.1, 149.4, 143.0, 140.0, 124.1, 113.7, 110.8, 110.0, 107.5, 46.1, 37.2, 35.5, 31.7, 30.9, 30.4, 28.9, 28.4, 23.7, 22.6, 20.5, 14.1; IR (neat, thin film) 3444 (br.), 2853-2961, 1629, 1582, 1446, 1028  $\text{cm}^{-1}$ ; HRMS (ESI)  $m/z$ :  $[\text{M}+\text{Na}]^+$  calc'd for  $\text{C}_{22}\text{H}_{32}\text{O}_2\text{Na}$  351.2288  $m/z$ .

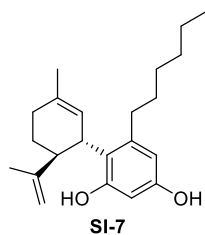

Isolated as a by-product from the reaction of (–)-**8** and **19b** shown above was the abnormal regioisomer (+)-*abn*-CBDH (**SI-7**, 0.0133 g, 13% yield) as an amorphous white solid. Characterization data for (+)-**SI-7**:  $[\alpha]_D^{23} = +123.73$  ( $c = 0.06$ ,  $\text{CHCl}_3$ );  $^1\text{H NMR}$  (500 MHz,  $\text{CDCl}_3$ )  $\delta = 6.19$  (s, 1H), 6.20 (s, 1H), 6.04 (s, 1H), 5.52 (s, 1H), 4.64 (s, 1H), 4.45 (s, 1H), 3.49-3.55 (m, 1H), 2.55-2.61 (m, 1H), 2.44-2.49 (m, 1H), 2.19-2.28 (m, 2H), 2.07-2.11 (m, 1H), 1.79 (s, 3H), 1.74-1.83 (m, 2H), 1.53 (s, 3H), 1.44-1.47 (m, 2H), 1.27-1.31 (m, 6H), 0.86-0.90 (m, 3H);  $^{13}\text{C NMR}$  (125 MHz,  $\text{CDCl}_3$ )  $\delta = 156.4$ , 154.6, 147.7, 144.1, 139.9, 124.8, 120.1, 111.5, 108.6, 102.2, 45.1, 40.1, 34.1, 31.8, 31.5, 30.4, 29.5, 28.2, 23.8, 22.7, 21.4, 14.2; IR (neat, thin film) 3433 (br.), 2853-2958, 1594-1622, 1453, 1149, 1135  $\text{cm}^{-1}$ ; HRMS (ESI)  $m/z$ :  $[\text{M}]^+$  calc'd for  $\text{C}_{22}\text{H}_{24}\text{O}_2$  329.2482; found 329.2480  $m/z$ .

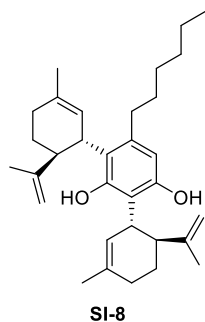

Isolated as a by-product from the reaction of (–)-**8** and **19b** shown above was the *bis* isomer **SI-8** as an amorphous white solid. Characterization data for (+)-*bis*-CBDH (**SI-8**, 0.0306 g, 21% yield)  $[\alpha]_D^{23} = +103.87$  ( $c = 0.2$ ,  $\text{CHCl}_3$ );  $^1\text{H NMR}$  (500 MHz,  $\text{CDCl}_3$ )  $\delta = 6.20$  (s, 1H), 5.92 (s, 1H), 5.77 (s, 1H), 5.58 (s, 1H), 5.48 (s, 1H), 4.60 (s, 1H), 4.50 (s, 1H), 4.44 (s, 1H), 4.42 (s, 1H), 4.00 (br. d,  $J = 8.5$  Hz, 1H), 3.48-3.50 (m, 1H), 2.53 (quint.,  $J = 7.5$  Hz, 1H), 2.41-2.47 (m, 2H), 2.18-2.24 (m, 3H), 2.04-2.10 (m, 2H), 1.78 (s, 3H), 1.76 (s, 3H), 1.70 (s, 3H), 1.53-1.67 (m, 4H), 1.49 (s, 3H), 1.39-1.46 (m, 2H), 1.25-1.31 (m, 6H), 0.85-0.90 (m, 3H);  $^{13}\text{C NMR}$  (125 MHz,  $\text{CDCl}_3$ )  $\delta = 154.1$ , 153.8, 148.0, 147.7, 141.3, 139.8, 139.2, 125.1, 124.9, 119.1, 115.4, 111.4, 111.3, 109.5, 46.7, 44.4, 40.6, 35.8, 34.1,

31.9, 31.6, 30.6, 30.5, 29.6, 28.6, 28.4, 23.8, 23.7, 22.8, 21.6, 19.0, 14.2 ; IR (neat, thin film) 3440 (br.), 3073, 2832-2968, 1644, 1620, 1579, 1434, 1376, 1257, 890  $\text{cm}^{-1}$  ; HRMS (ESI)  $m/z$ :  $[\text{M}+\text{Na}]^+$  calc'd for  $\text{C}_{32}\text{H}_{46}\text{O}_2\text{Na}$  485.3395; found 485.3393  $m/z$ .

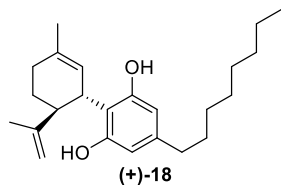

(+)-*ent*-CBD-Oct [(+)-**18**]. Was prepared in a similar manner to (+)-*ent*-CBD [(+)-**2**] by substituting olivetol (**10**) with 5-octylbenzene-1,3-diol (**19d**, 0.086 g, 0.394 mmol, 1.2 equiv.). The crude product was purified *via* flash column chromatography (10% EtOAc / 90% Hexanes to 30% EtOAc / 70% Hexanes) to afford the desired product (+)-**18** (0.0324 g, 28% yield) as an amorphous white solid. Characterization data for (+)-**18**:  $[\alpha]_D^{23} = +71.64$  ( $c = 0.1$ ,  $\text{CHCl}_3$ );  $^1\text{H}$  NMR (500 MHz,  $\text{CDCl}_3$ )  $\delta = 6.27$  (br. s, 1H), 6.15 (br. s, 1H), 5.97 (br. s, 1H), 5.56 (s, 1H), 4.65 (s, 1H), 4.55 (s, 1H), 3.84 (br. d,  $J = 8.5$  Hz, 1H), 2.43 (t,  $J = 8$  Hz, 2H), 2.39 (dt,  $J = 2.5, 11$  Hz, 1H), 2.20-2.25 (m, 1H), 2.06-2.12 (m, 1H), 1.79 (s, 3H), 1.75-1.83 (m, 2H), 1.65 (s, 3H), 1.20-1.60 (m, 12H), 0.87 (t,  $J = 6.5$  Hz, 3H);  $^{13}\text{C}$  NMR (125 MHz,  $\text{CDCl}_3$ )  $\delta = 156.2, 154.0, 149.5, 143.1, 140.2, 124.2, 113.8, 100.9, 109.9, 108.0, 46.2, 37.4, 35.6, 32.0, 31.1, 30.5, 29.6, 29.4, 29.4, 28.5, 23.8, 22.8, 20.6, 14.2$  ; IR (neat, thin film) 3443 (br.), 2855-2955, 1628, 1581, 1445  $\text{cm}^{-1}$  ; HRMS (ESI)  $m/z$ :  $[\text{M}]^+$  calc'd for  $\text{C}_{24}\text{H}_{37}\text{O}_2$  357.2795; found 357.2785  $m/z$ .

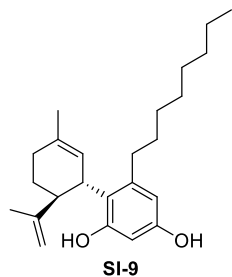

Isolated as a by-product from the reaction of (–)-**8** and **19d** shown above was the abnormal regioisomer (+)-*abn*-CBD-Oct (**SI-9**, 0.0179 g, 15% yield) as an amorphous white solid. Characterization data for (+)-**SI-9**:  $[\alpha]_D^{23} = +84.5$  ( $c = 0.1$ ,  $\text{CHCl}_3$ );  $^1\text{H}$  NMR (500 MHz,  $\text{CDCl}_3$ )  $\delta = 6.20$  (s, 1H), 6.19 (s, 1H), 6.04 (s, 1H), 5.52 (s, 1H), 4.64 (s, 1H), 4.45 (s, 1H), 3.52 (br. d,  $J = 8$  Hz, 1H), 2.58 (quint.,  $J = 7$  Hz, 1H), 2.47 (app. t,  $J = 9.5$  Hz, 1H), 2.19-2.28 (m, 2H), 2.06-2.12 (m, 1H), 1.78 (s, 3H), 1.75-1.86 (m, 2H), 1.53 (s, 3H), 1.40-1.50 (m, 2H), 1.20-1.33 (m, 10H), 0.88 (t,  $J = 6.5$  Hz, 3H);  $^{13}\text{C}$  NMR (125 MHz,  $\text{CDCl}_3$ )  $\delta = 156.6, 154.6, 147.7, 144.1, 139.9, 124.8, 120.0, 111.5, 108.6, 102.2, 45.0, 40.1, 34.1, 32.0, 31.5, 30.4, 29.8, 29.6, 29.4, 28.2, 23.8, 22.8, 21.4, 14.2$  ; IR (neat, thin film) 3439 (br.), 2852-2952, 1632, 1592, 1449, 1149, 1133  $\text{cm}^{-1}$  ; HRMS (ESI)  $m/z$ :  $[\text{M}]^+$  calc'd for  $\text{C}_{24}\text{H}_{37}\text{O}_2$  357.2795; found 357.2803  $m/z$ .

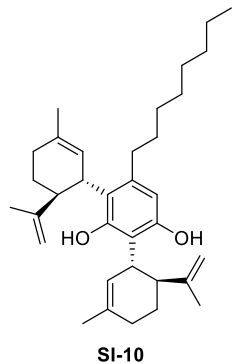

Isolated as a by-product from the reaction of (-)-**8** and **19d** shown above was the *bis* isomer **SI-10** as an amorphous white solid. Characterization data for (+)-*bis*-CBD-Oct (**SI-10**, 0.033 g, 21% yield):  $[\alpha]_D^{23} = +95.08$  (c = 0.3, CHCl<sub>3</sub>);

<sup>1</sup>H NMR (500 MHz, CDCl<sub>3</sub>)  $\delta$  = 6.20 (s, 1H), 5.92 (s, 1H), 5.78 (br. s, 1H), 5.58 (s, 1H), 5.49 (s, 1H), 4.60 (s, 1H), 4.50 (s, 1H), 4.45 (s, 1H), 4.42 (s, 1H), 4.00 (br. d, *J* = 8.5 Hz, 1H), 3.48-3.50 (m, 1H), 2.53 (quint., *J* = 7.5 Hz, 1H), 2.40-2.47 (m, 2H), 2.18-2.30 (m, 3H), 2.03-2.11 (m, 2H), 1.78 (s, 3H), 1.76 (s, 3H), 1.75-1.83 (m, 4H), 1.70 (s, 3H), 1.49 (s, 3H), 1.25-1.30 (m, 12H), 0.87 (t, *J* = 6.5 Hz, 3H); <sup>13</sup>C NMR (125 MHz, CDCl<sub>3</sub>)  $\delta$  = 154.1, 153.8, 148.0, 147.7, 141.3, 139.8, 139.2, 125.1, 124.9, 119.1, 115.4, 111.4, 111.3, 109.5,

46.7, 44.4, 40.6, 35.8, 34.1, 32.0, 31.6, 30.5, 30.5, 29.9, 29.6, 29.6, 28.6, 28.5, 23.8, 23.7, 22.8, 21.6, 19.0, 14.2; IR (neat, thin film) 3441 (br.), 3075, 2857-2962, 1646, 1624, 1577, 1432, 1376, 1258, 885 cm<sup>-1</sup>; HRMS (ESI) *m/z*: [M+Na]<sup>+</sup> calc'd for C<sub>34</sub>H<sub>50</sub>O<sub>2</sub>Na 513.3708; found 513.3689 *m/z*.

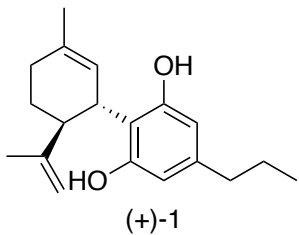

6.302  
6.181  
6.002  
5.593  
4.687  
4.611  
4.583  
3.869  
2.449  
2.418  
2.391  
2.257  
2.190  
2.132  
2.105  
1.841  
1.816  
1.677  
1.600  
0.925

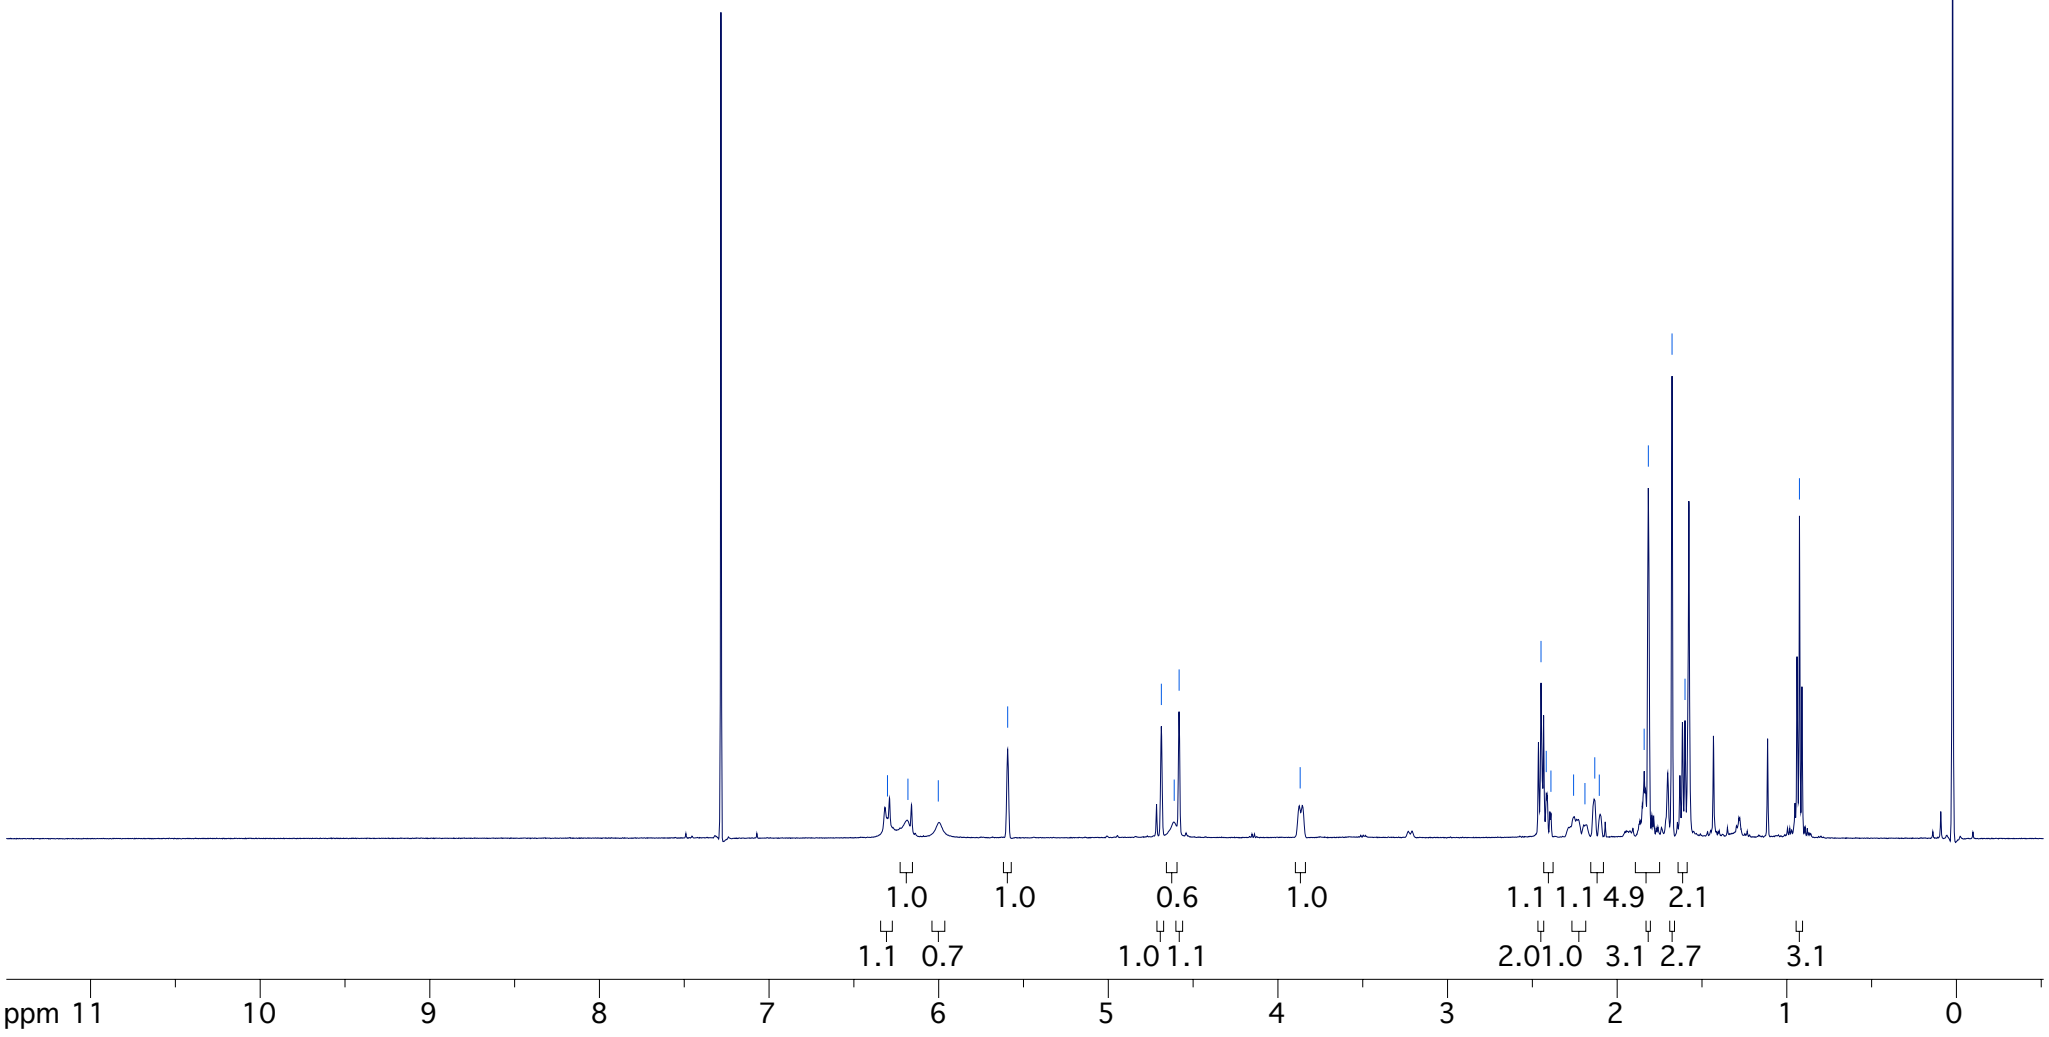

156.235  
154.069  
149.490  
142.892  
140.202  
124.242  
113.929  
110.978  
109.971  
108.173  
46.292  
37.705  
37.365  
30.533  
28.533  
24.164  
23.824  
20.630  
14.045  
13.937

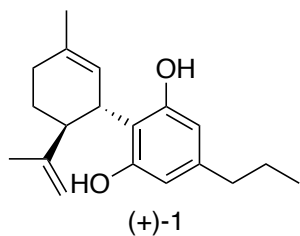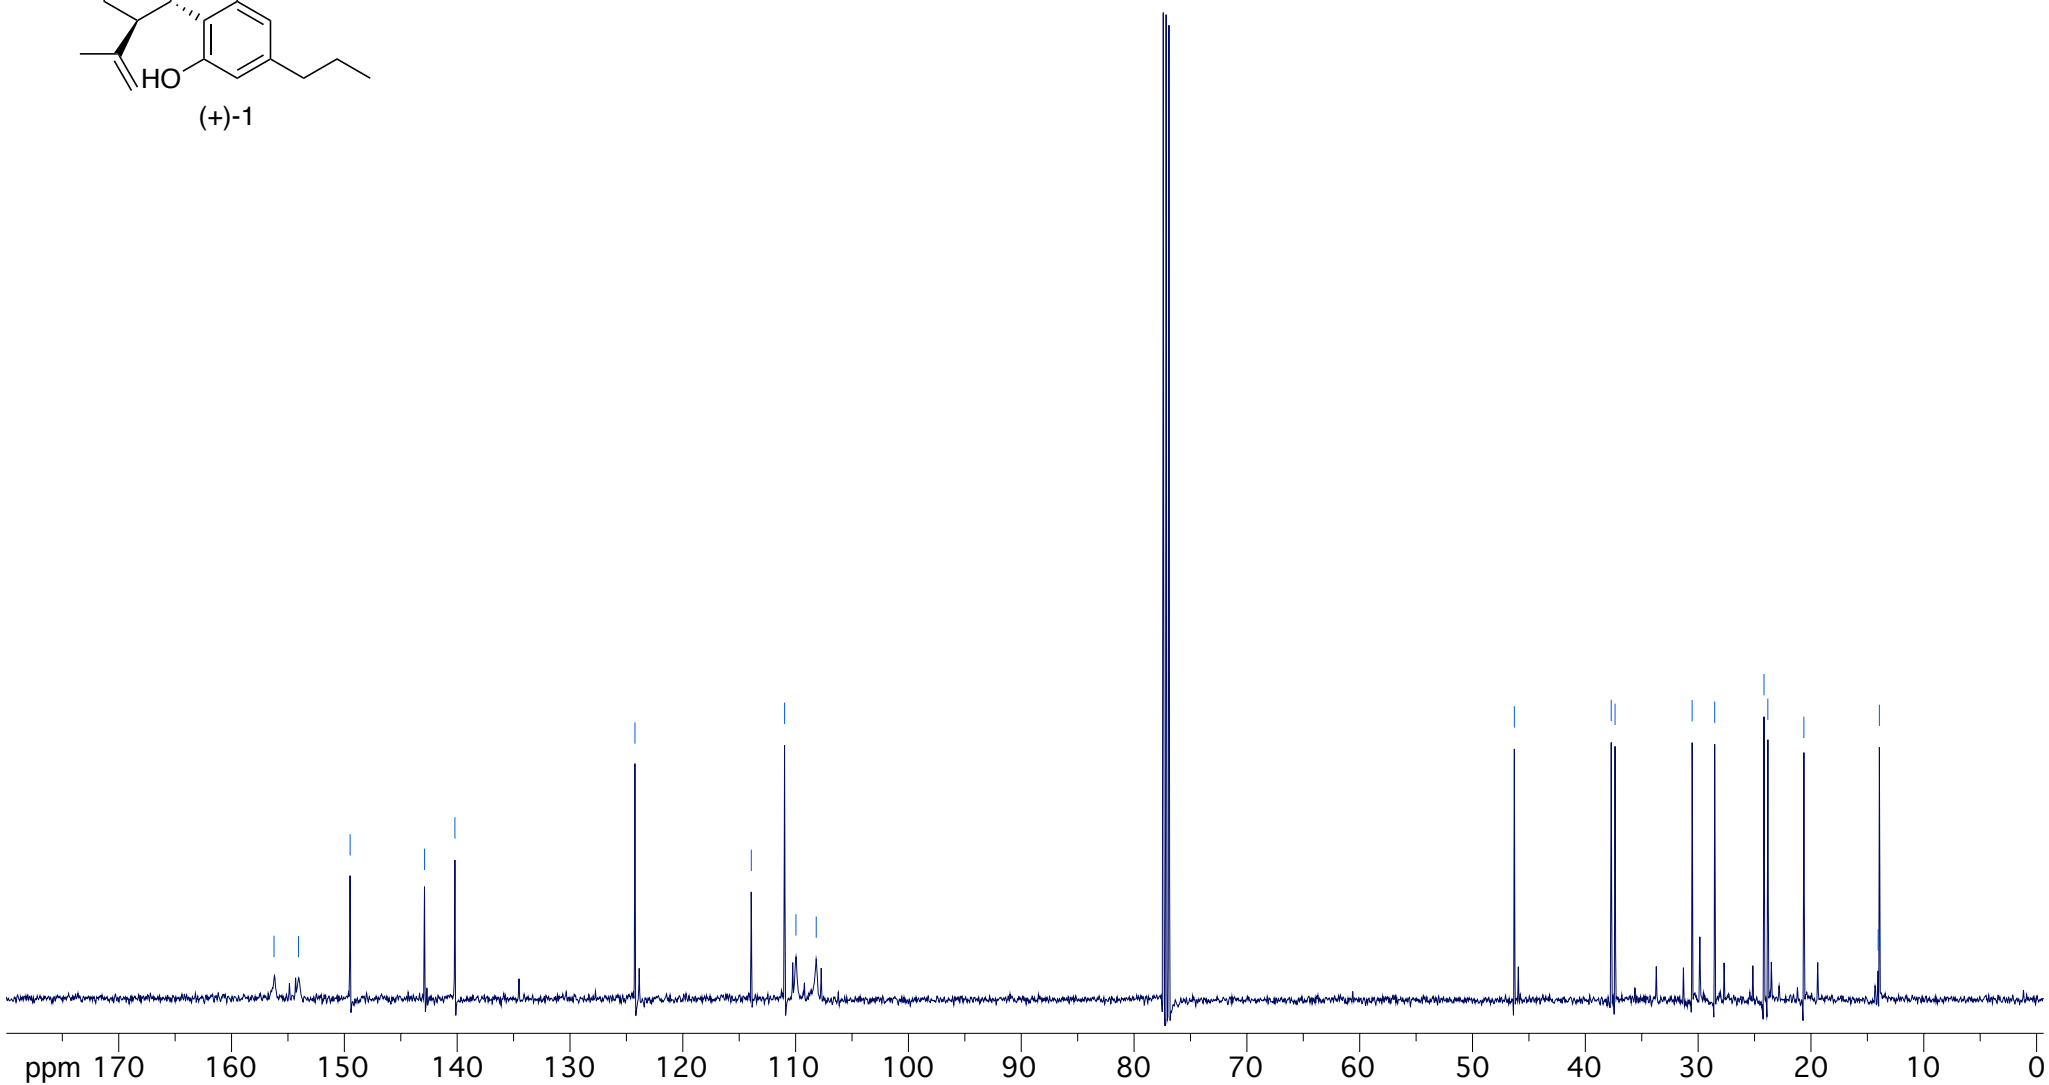

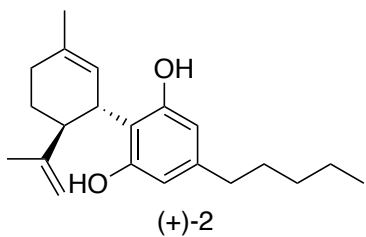

6.280  
6.164  
5.974  
5.569  
4.663  
4.597  
4.558  
3.848  
3.831  
2.437  
2.390  
2.229  
2.109  
2.075  
1.816  
1.791  
1.652  
1.610  
1.291  
0.875

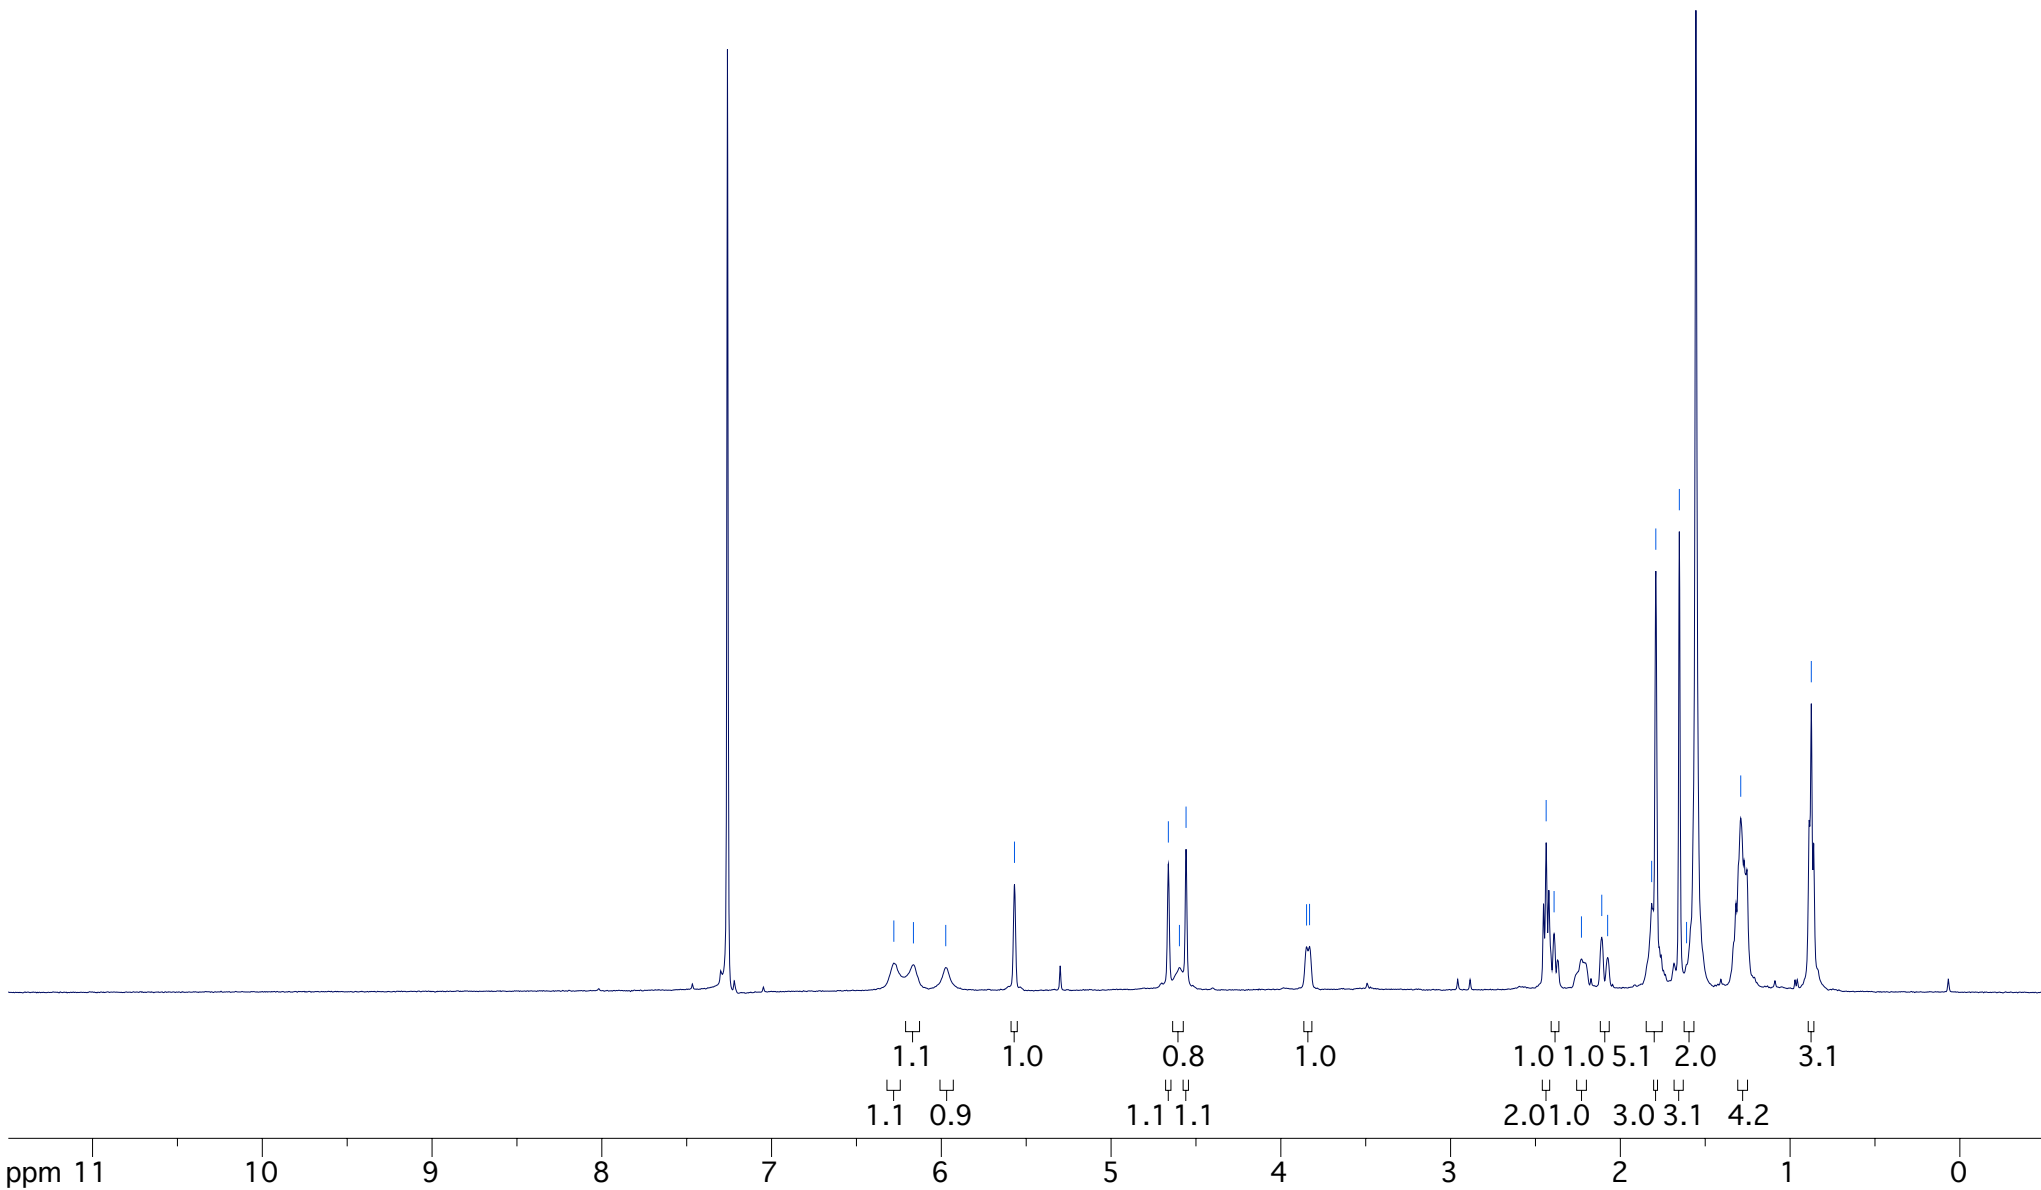

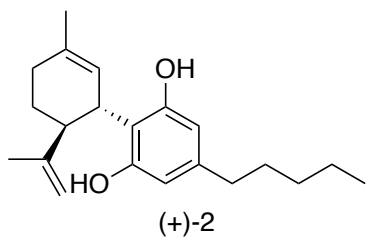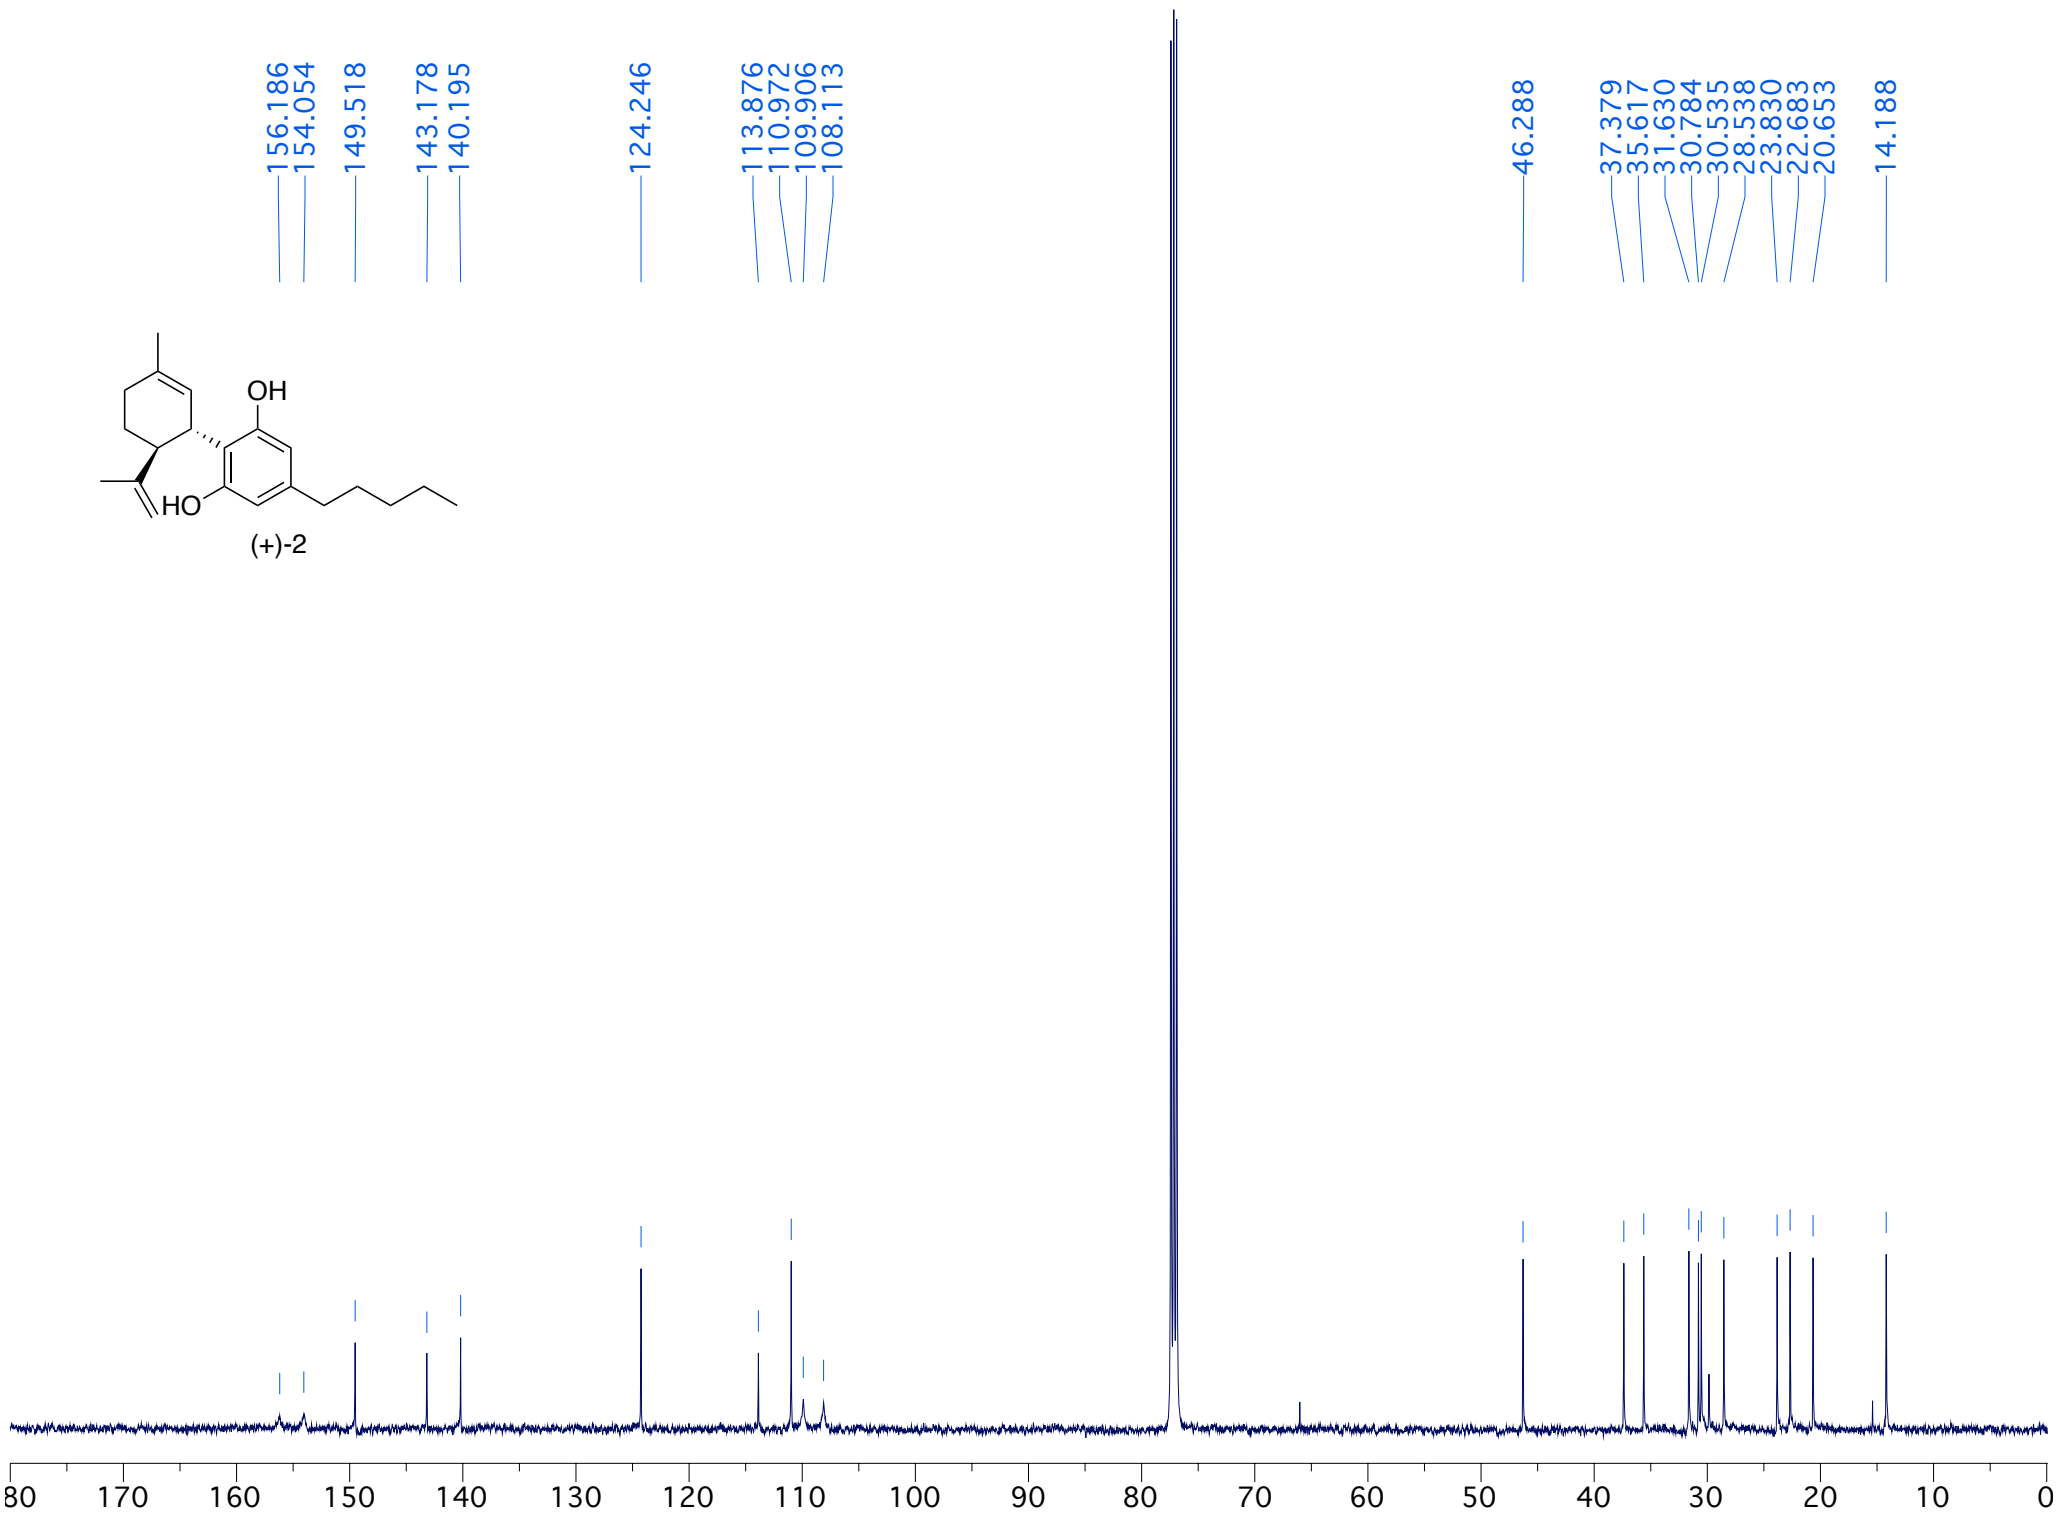



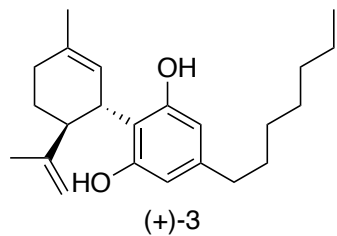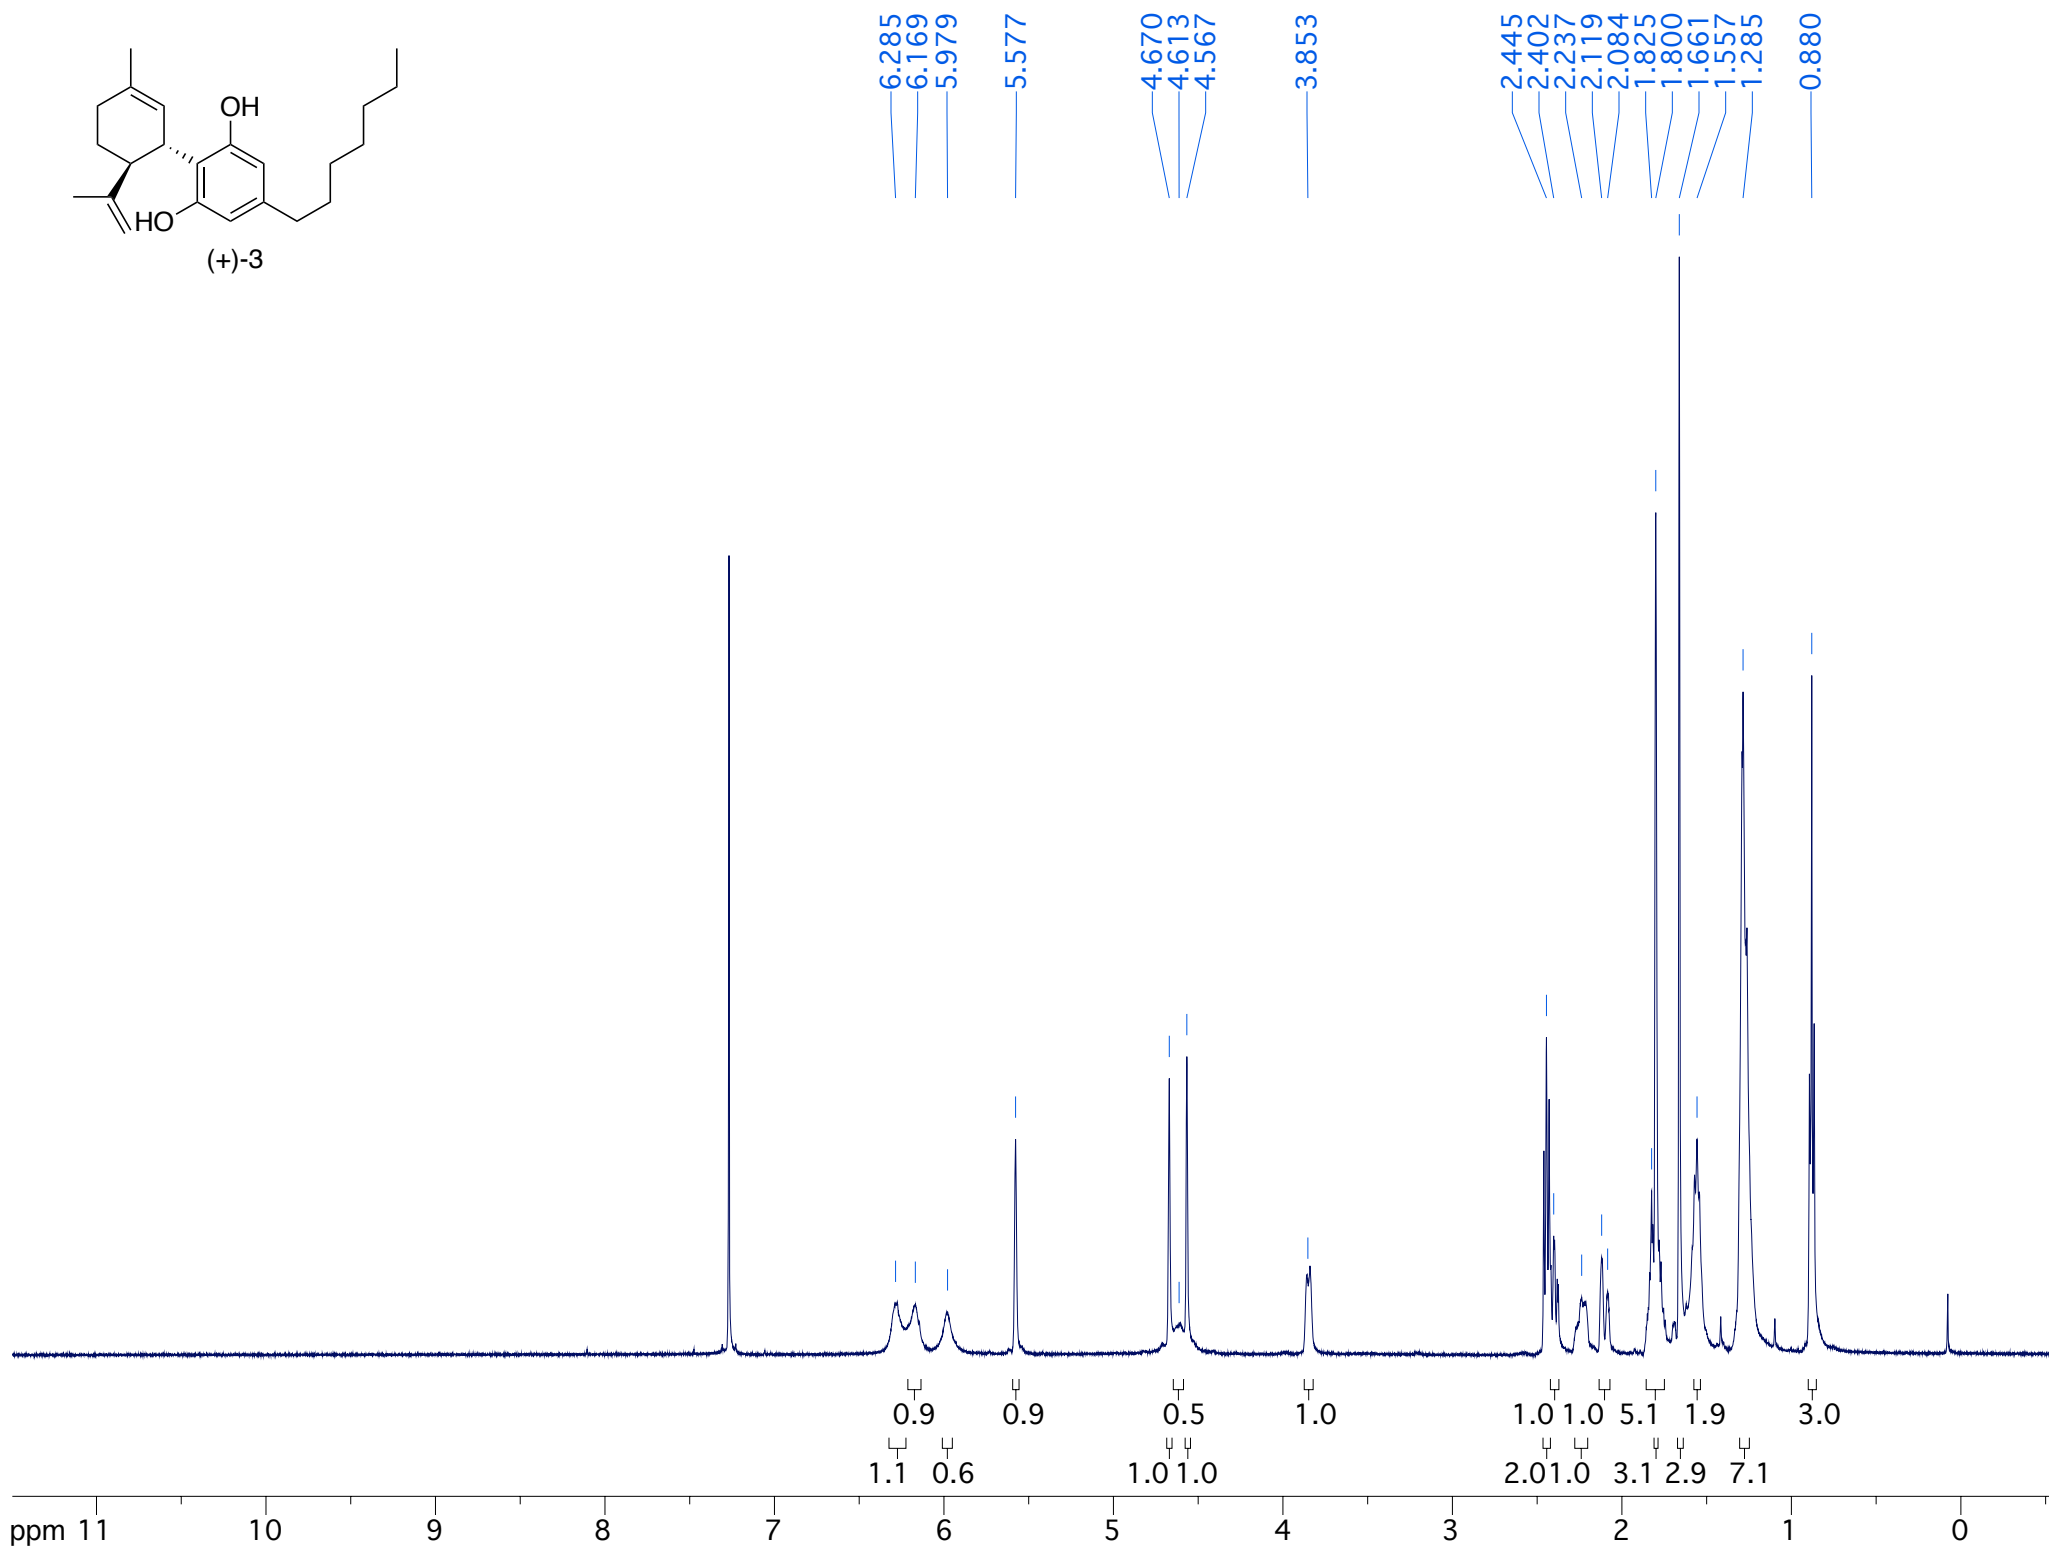

156.227  
153.996

149.533

143.192  
140.207

124.241

113.869  
110.974  
109.941  
108.143

46.285

37.403  
35.660  
31.955  
31.111  
30.541  
29.390  
29.320  
28.542  
23.837  
22.804  
20.675  
14.259

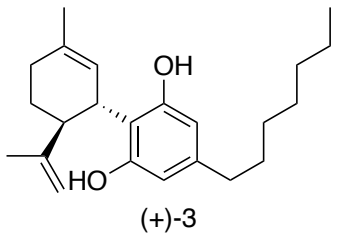

ppm 170 160 150 140 130 120 110 100 90 80 70 60 50 40 30 20 10 0

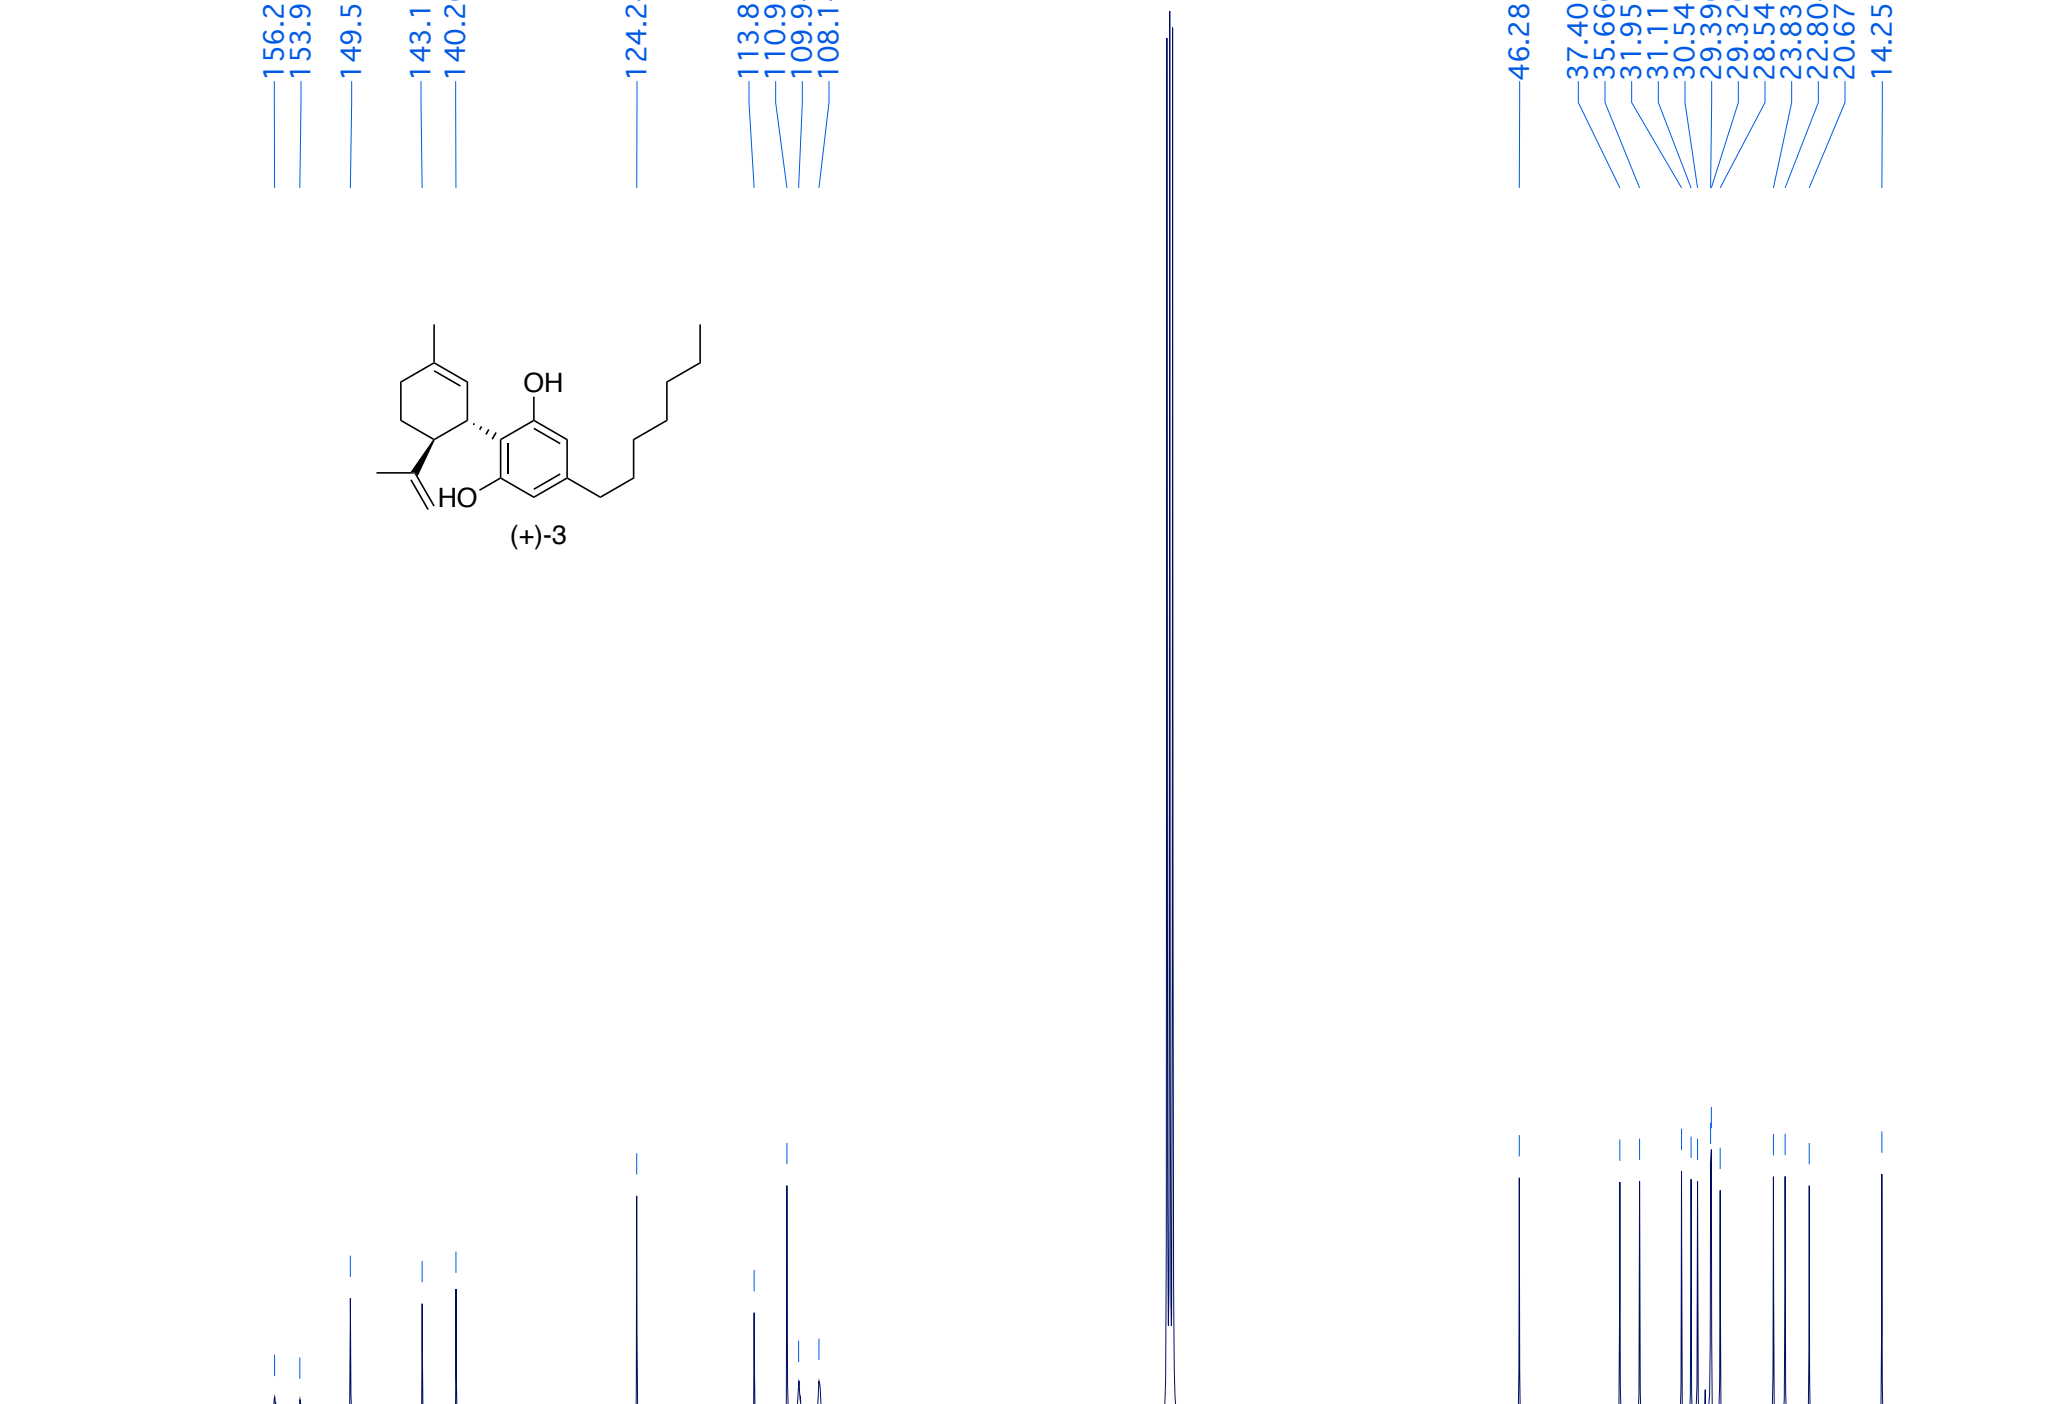

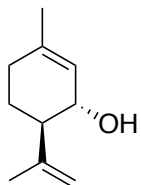

(-)-8

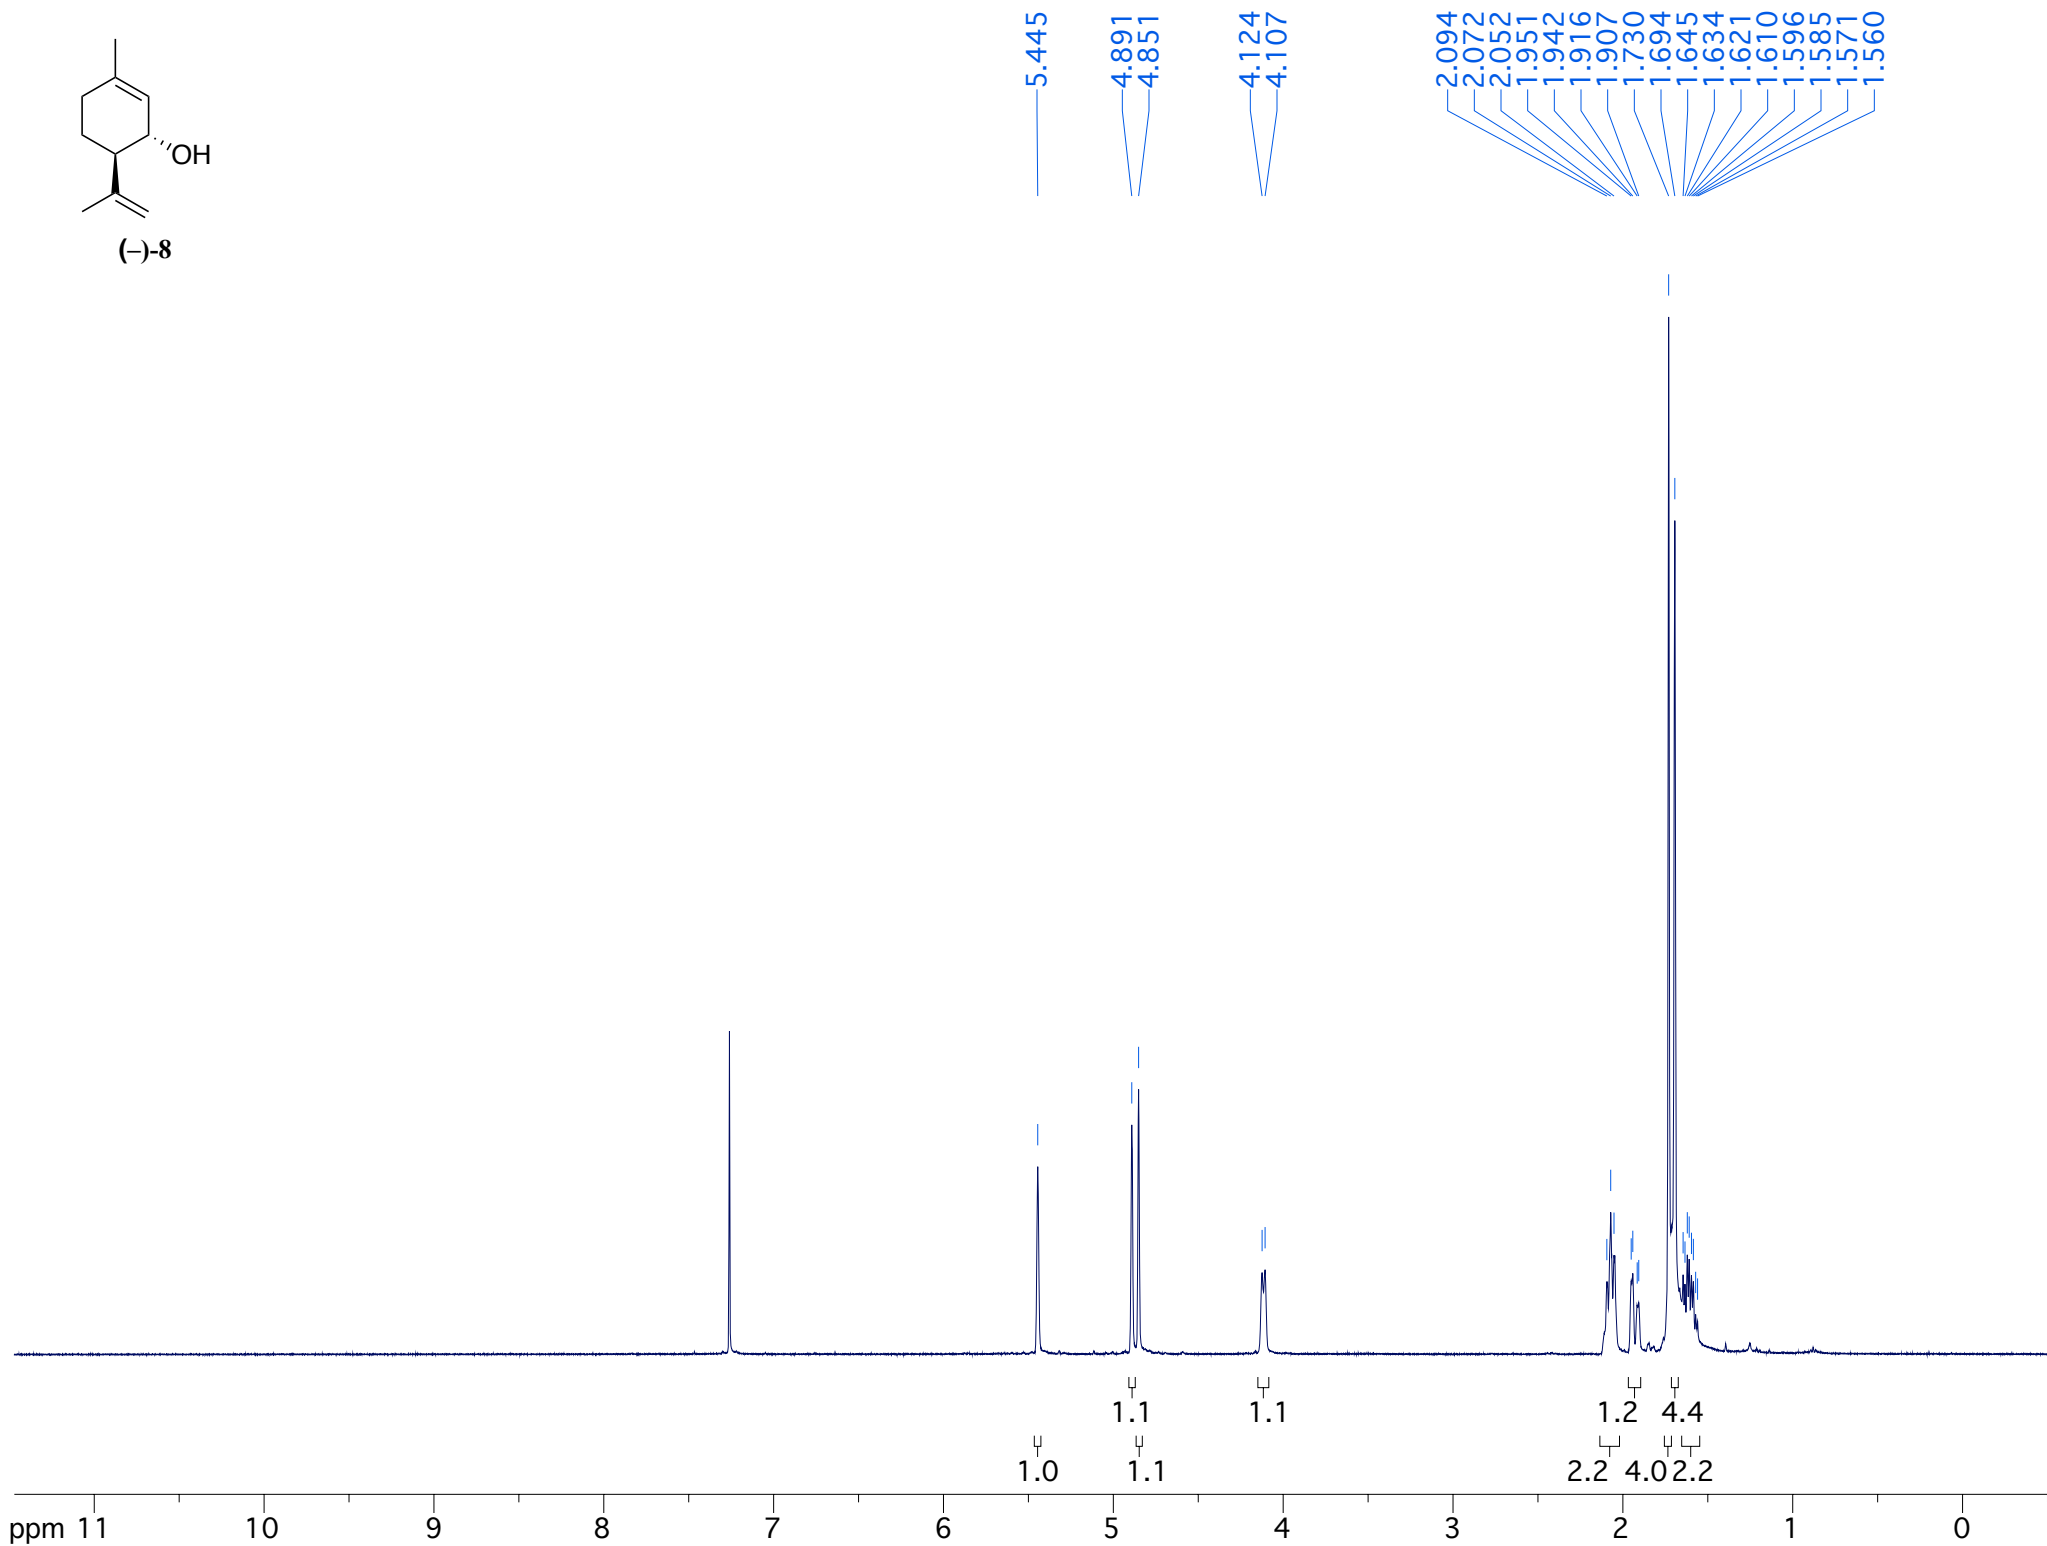



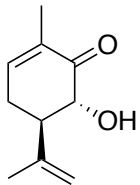

(+)-11

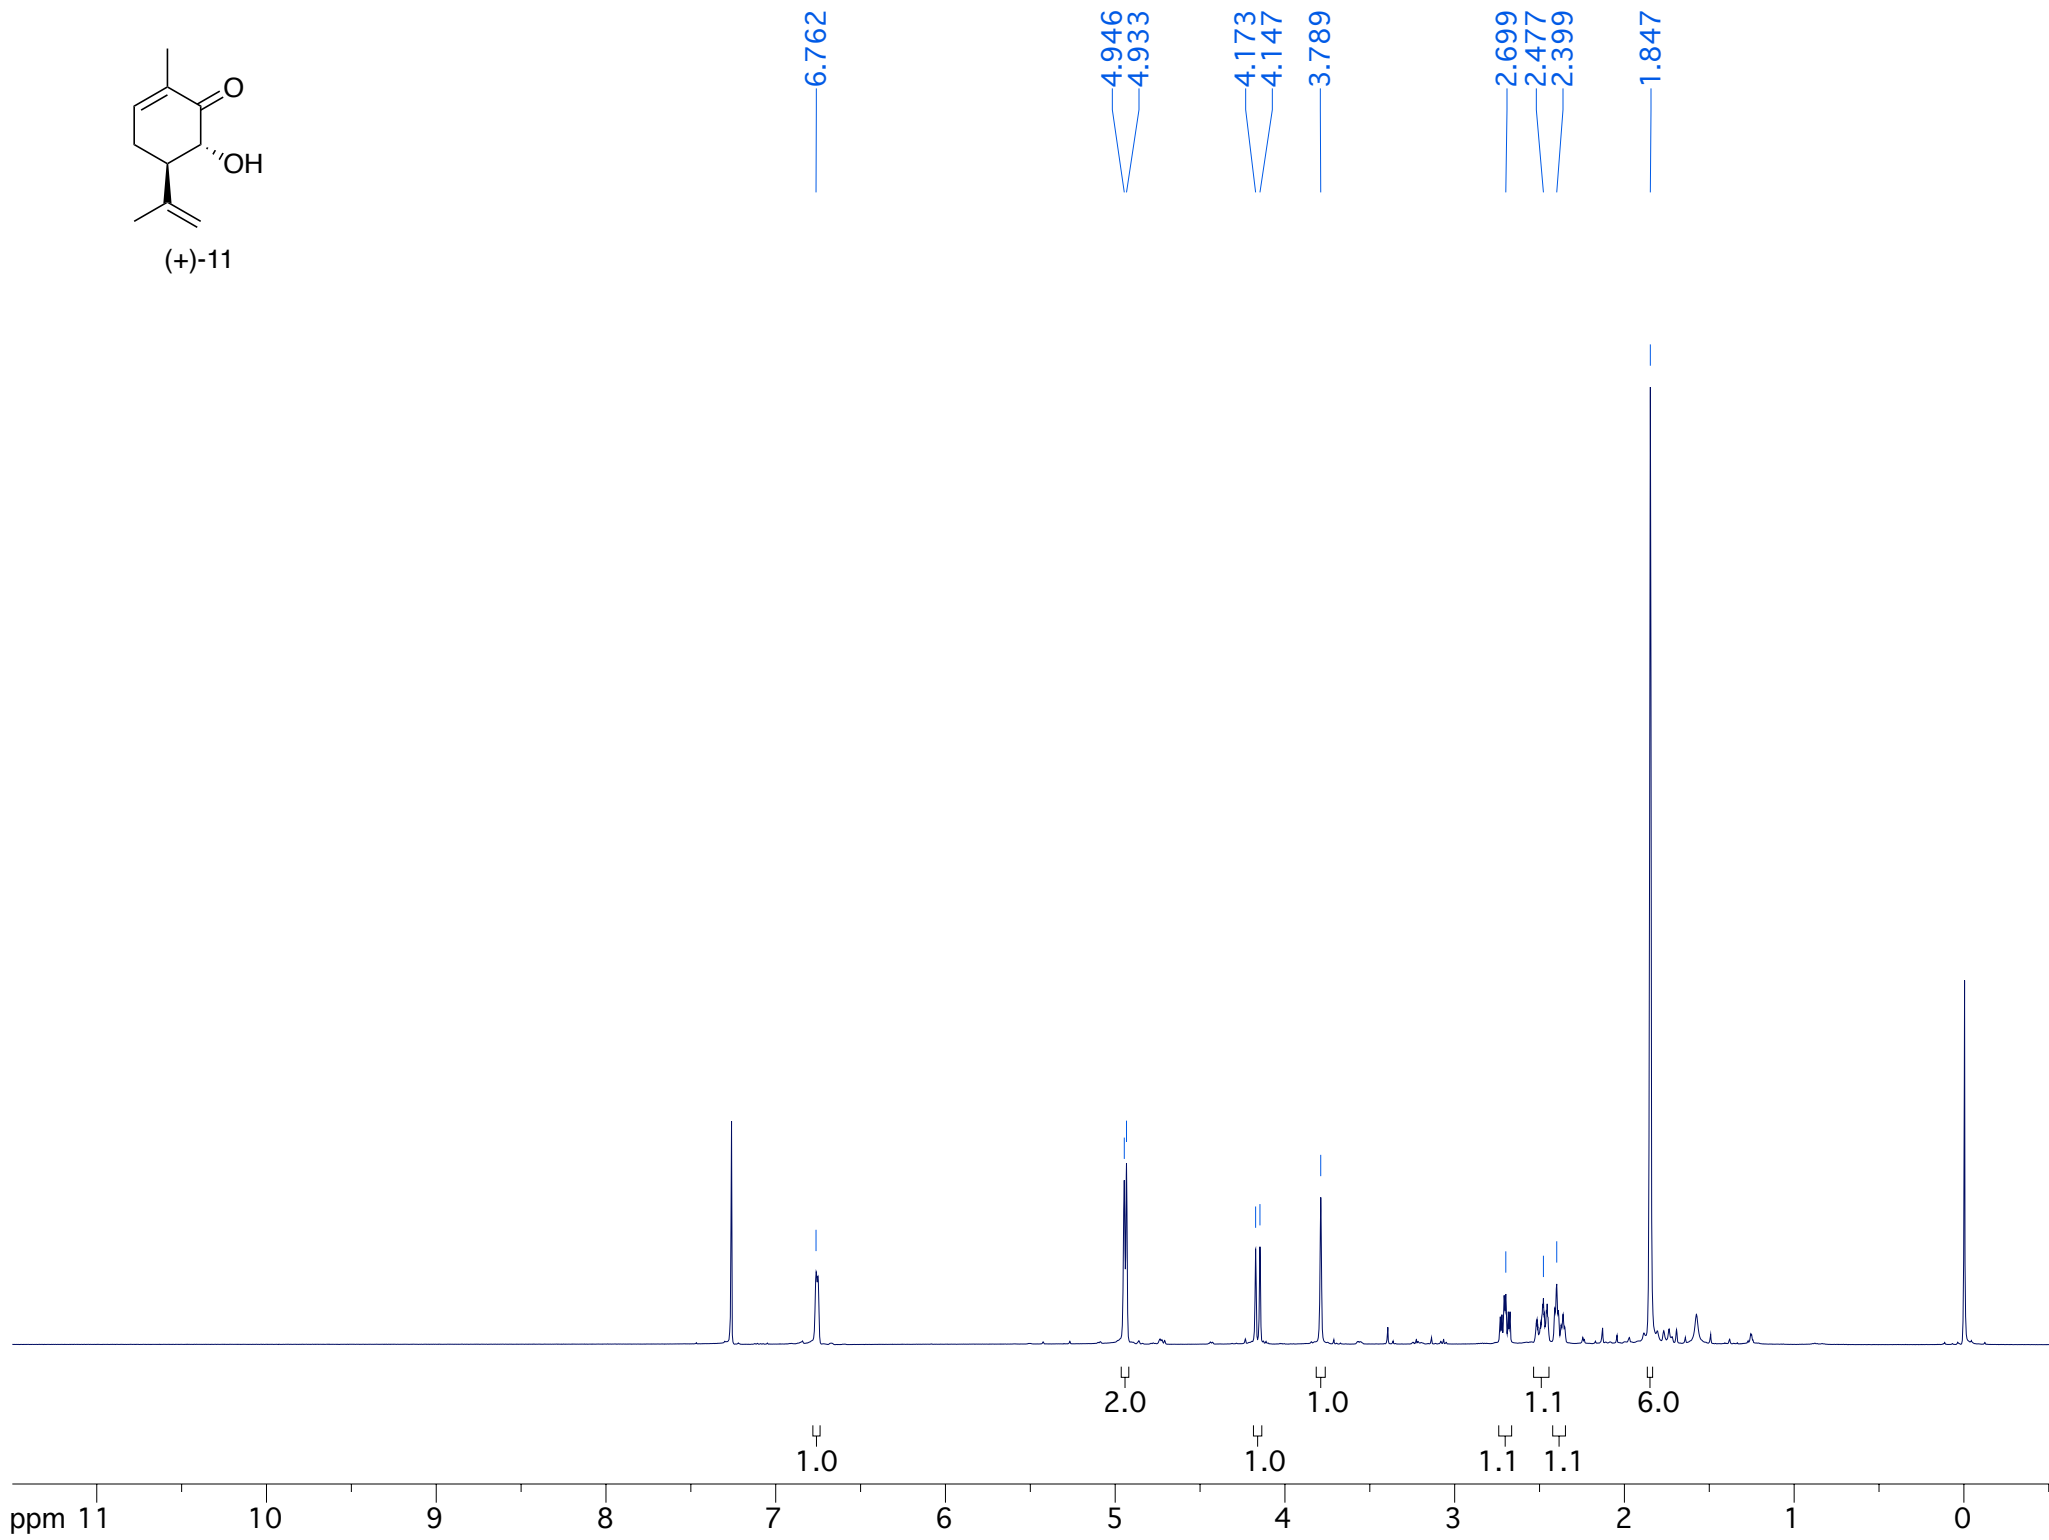

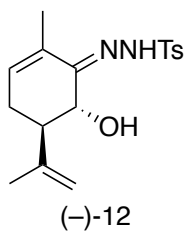

10.298

7.852  
7.837

7.300  
7.285

5.974

5.021  
4.912

4.453  
4.431

2.492  
2.418

2.161

1.792  
1.720

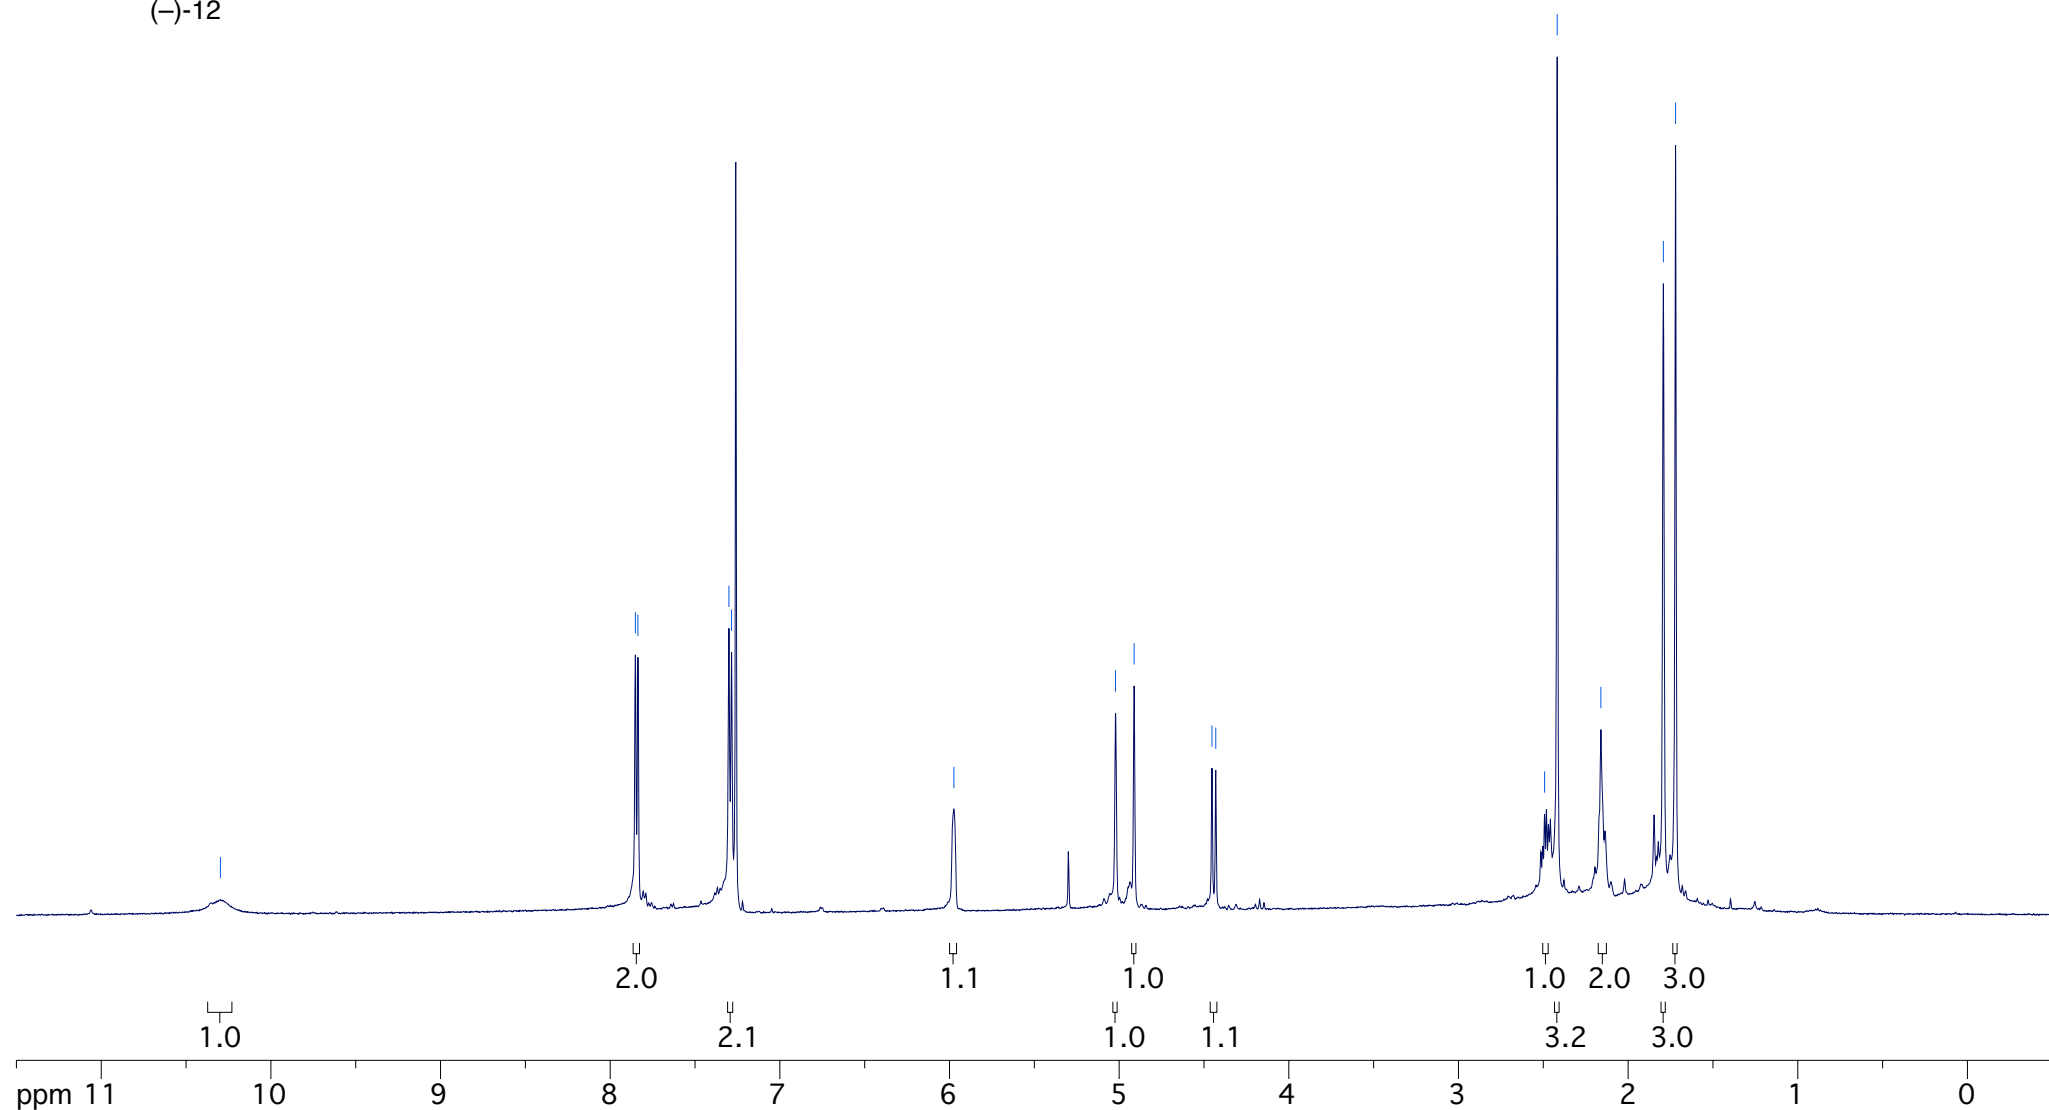

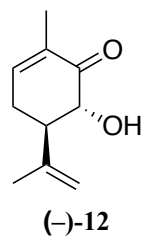

149.466

143.629

143.375

135.744

133.064

131.086

129.380

127.948

115.537

70.534

51.100

28.270

21.616

18.773

18.089

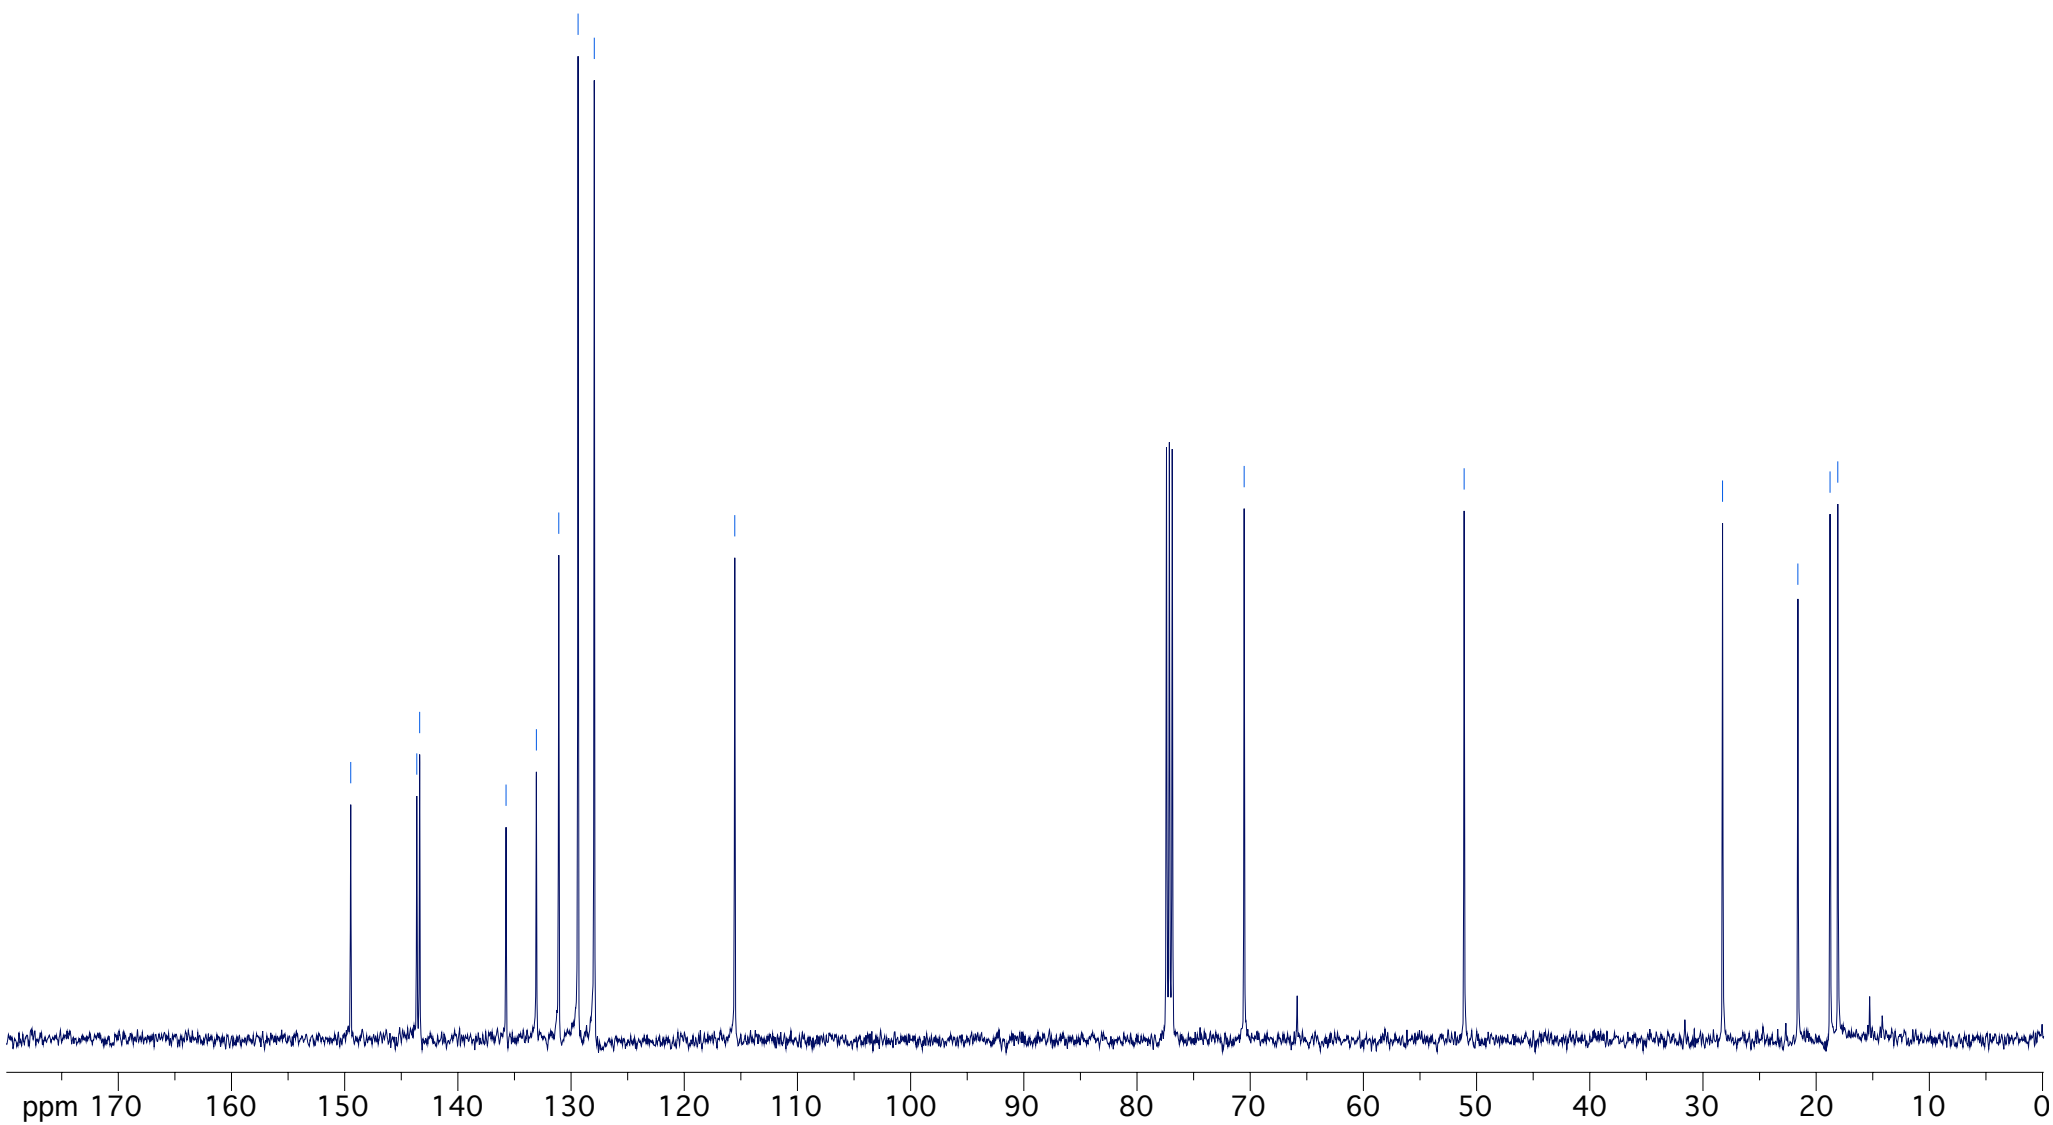

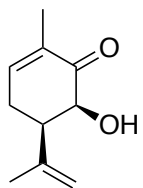

(-)-13

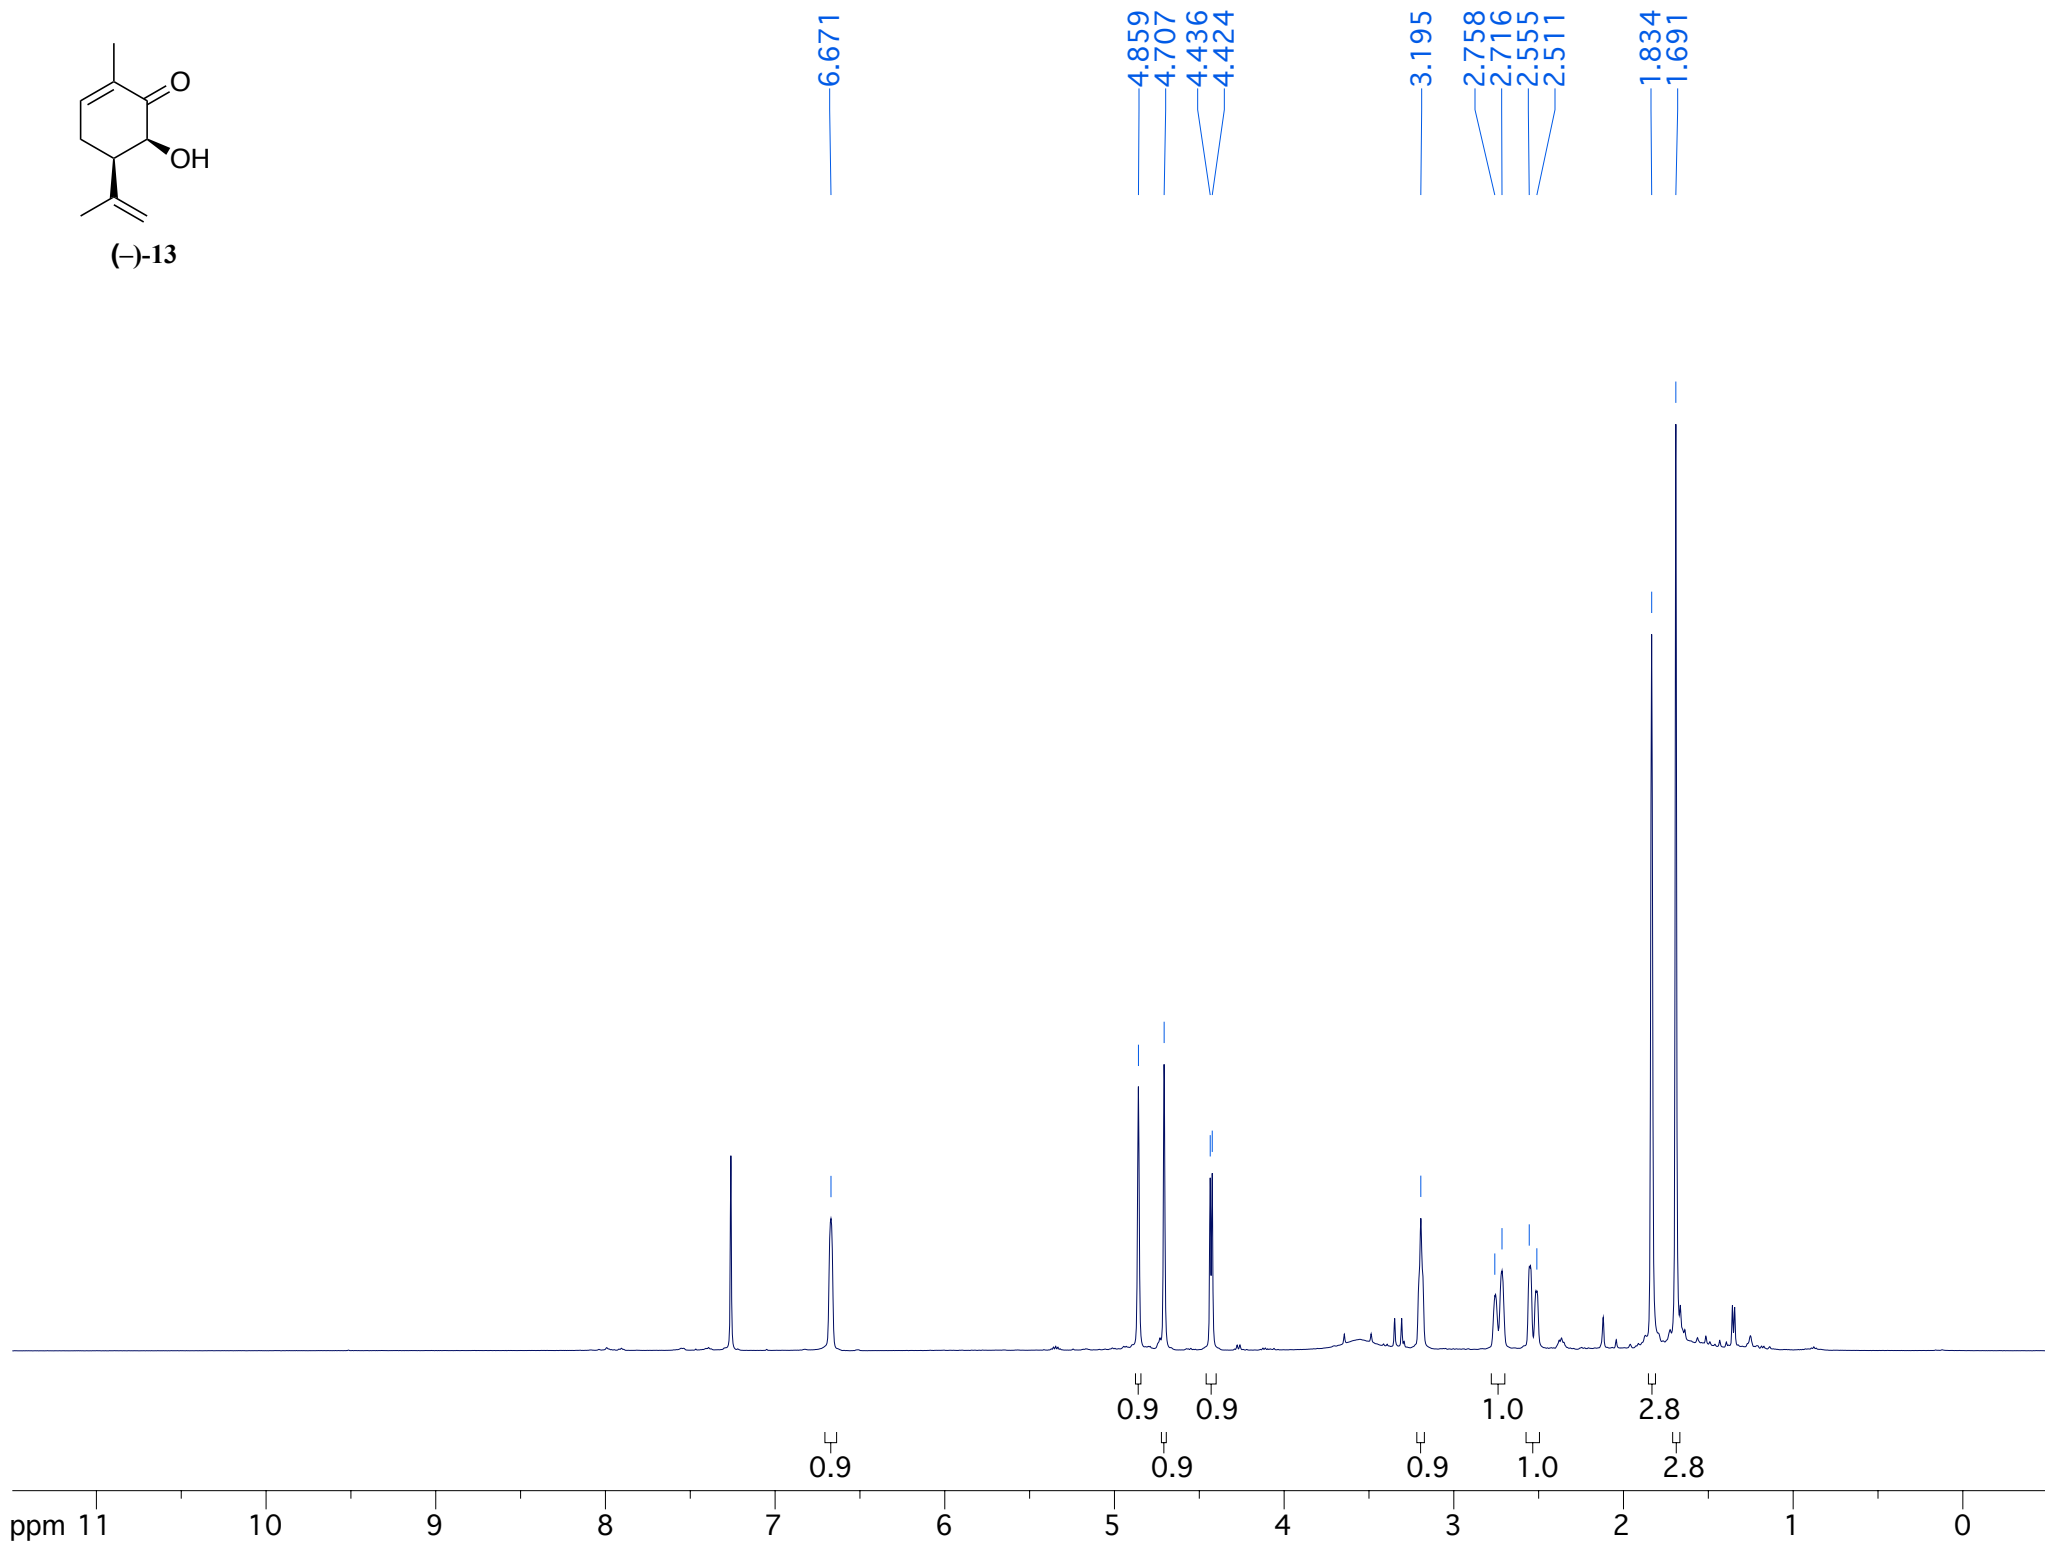



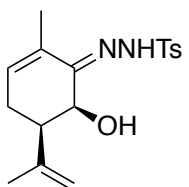

(+)-14

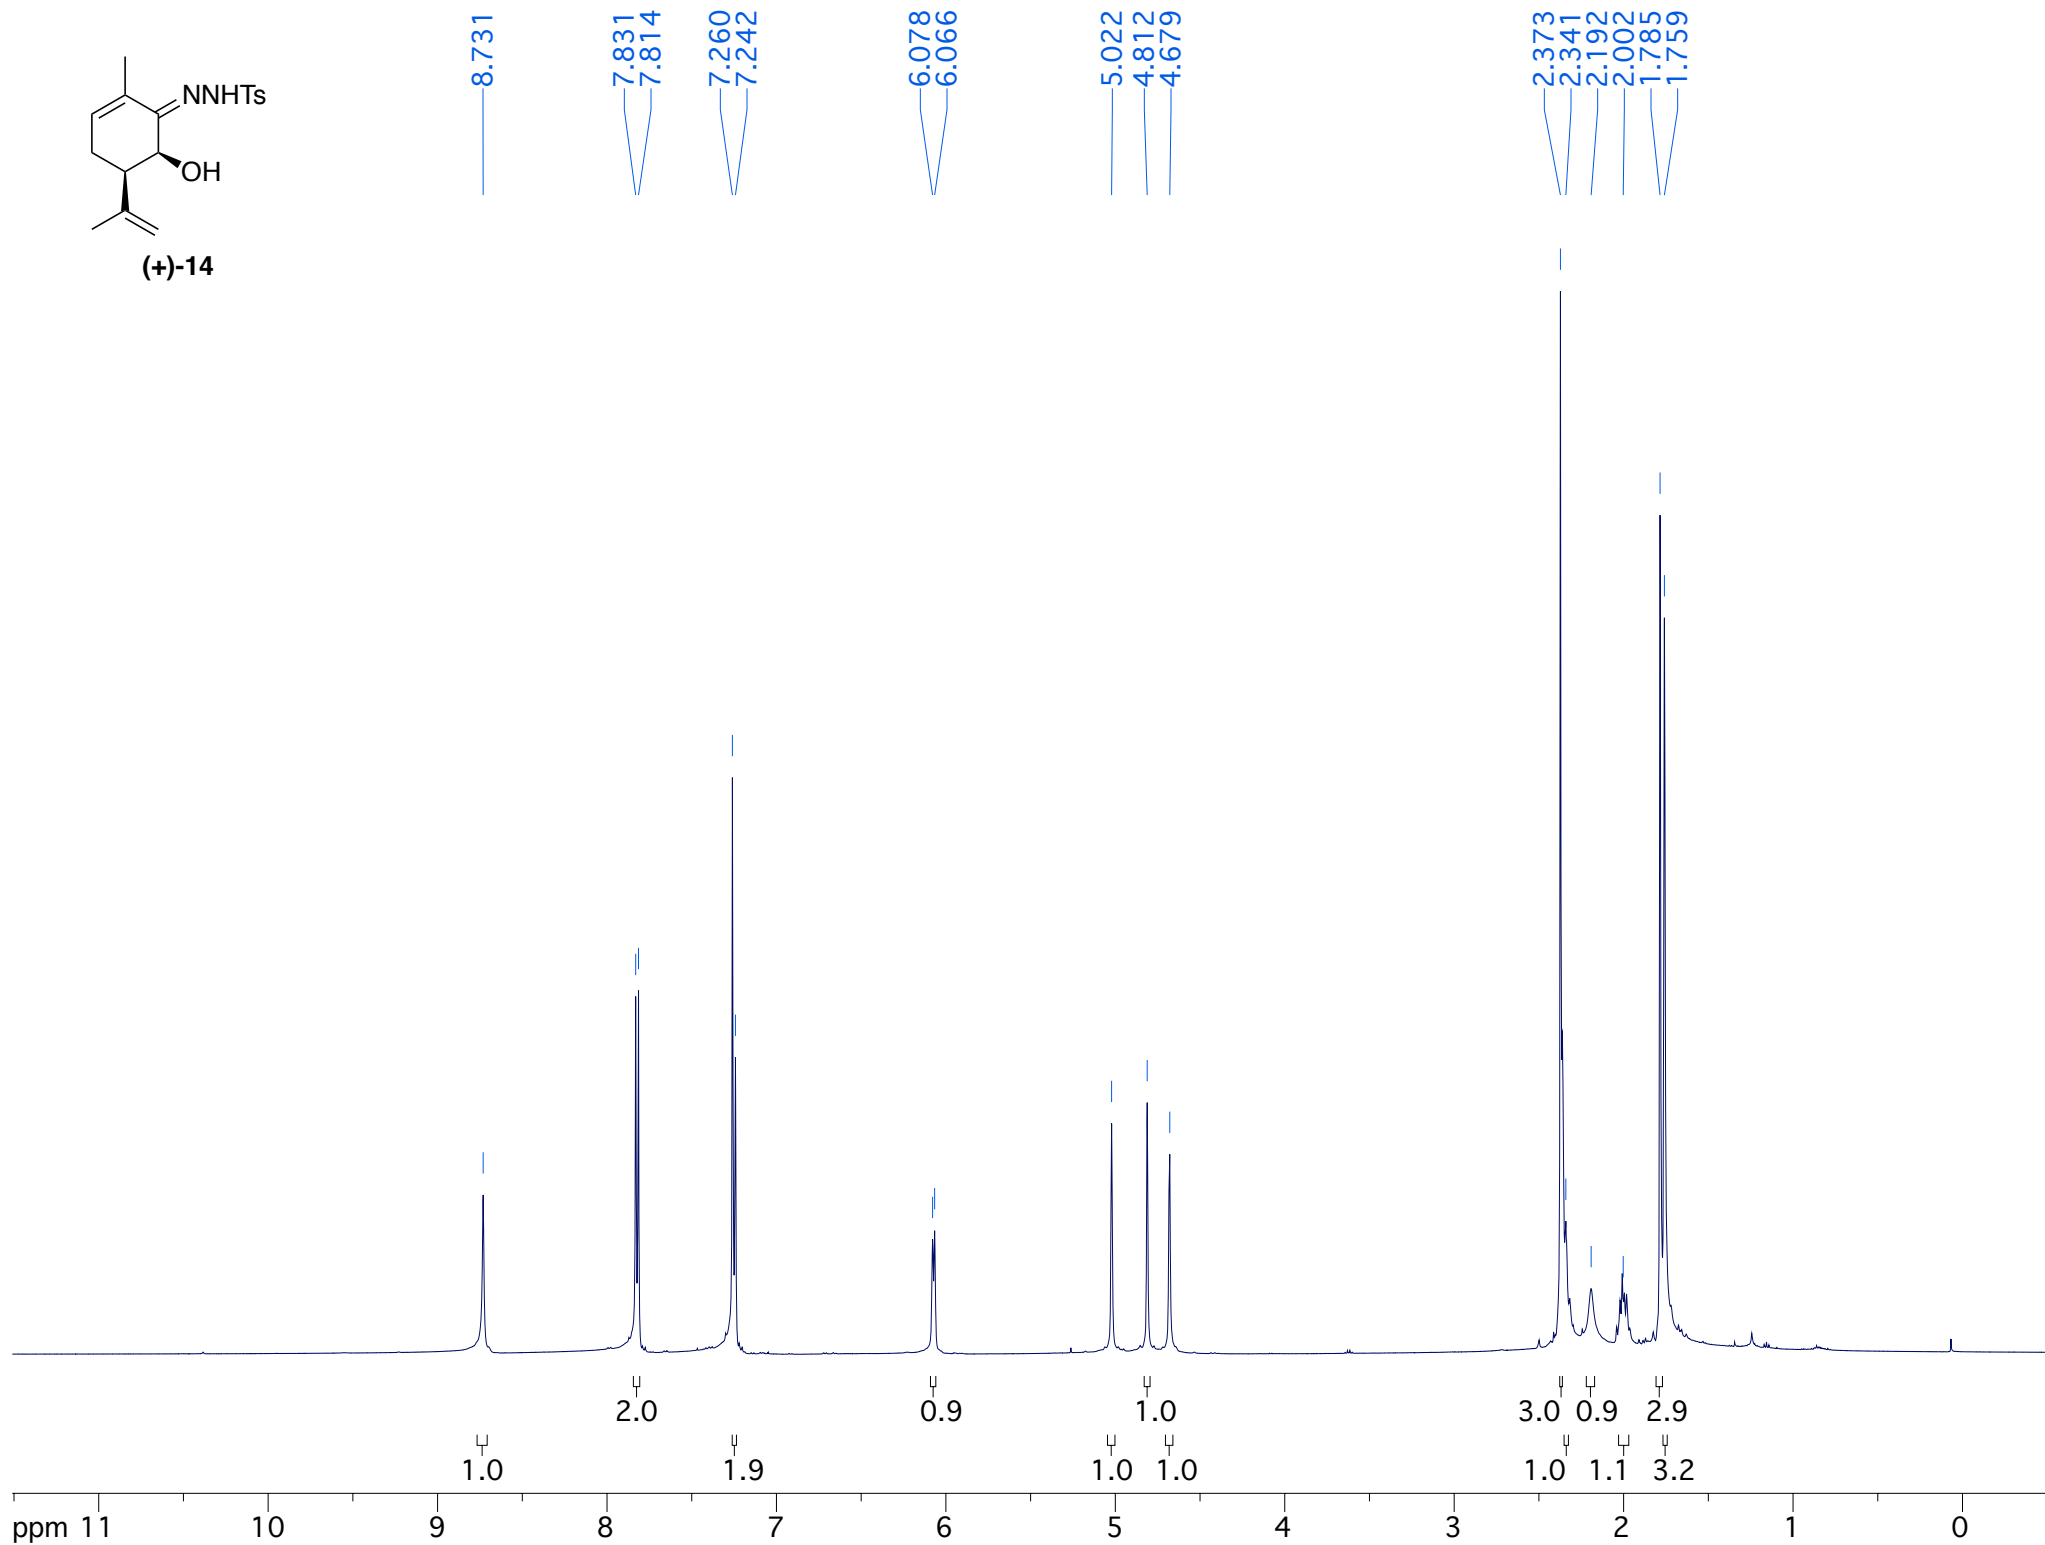

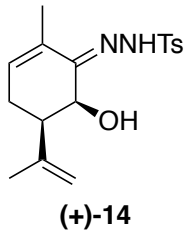

153.809

143.958

143.382

135.128

134.038

131.083

129.385

128.079

113.688

62.286

45.670

23.956

22.374

21.572

17.448

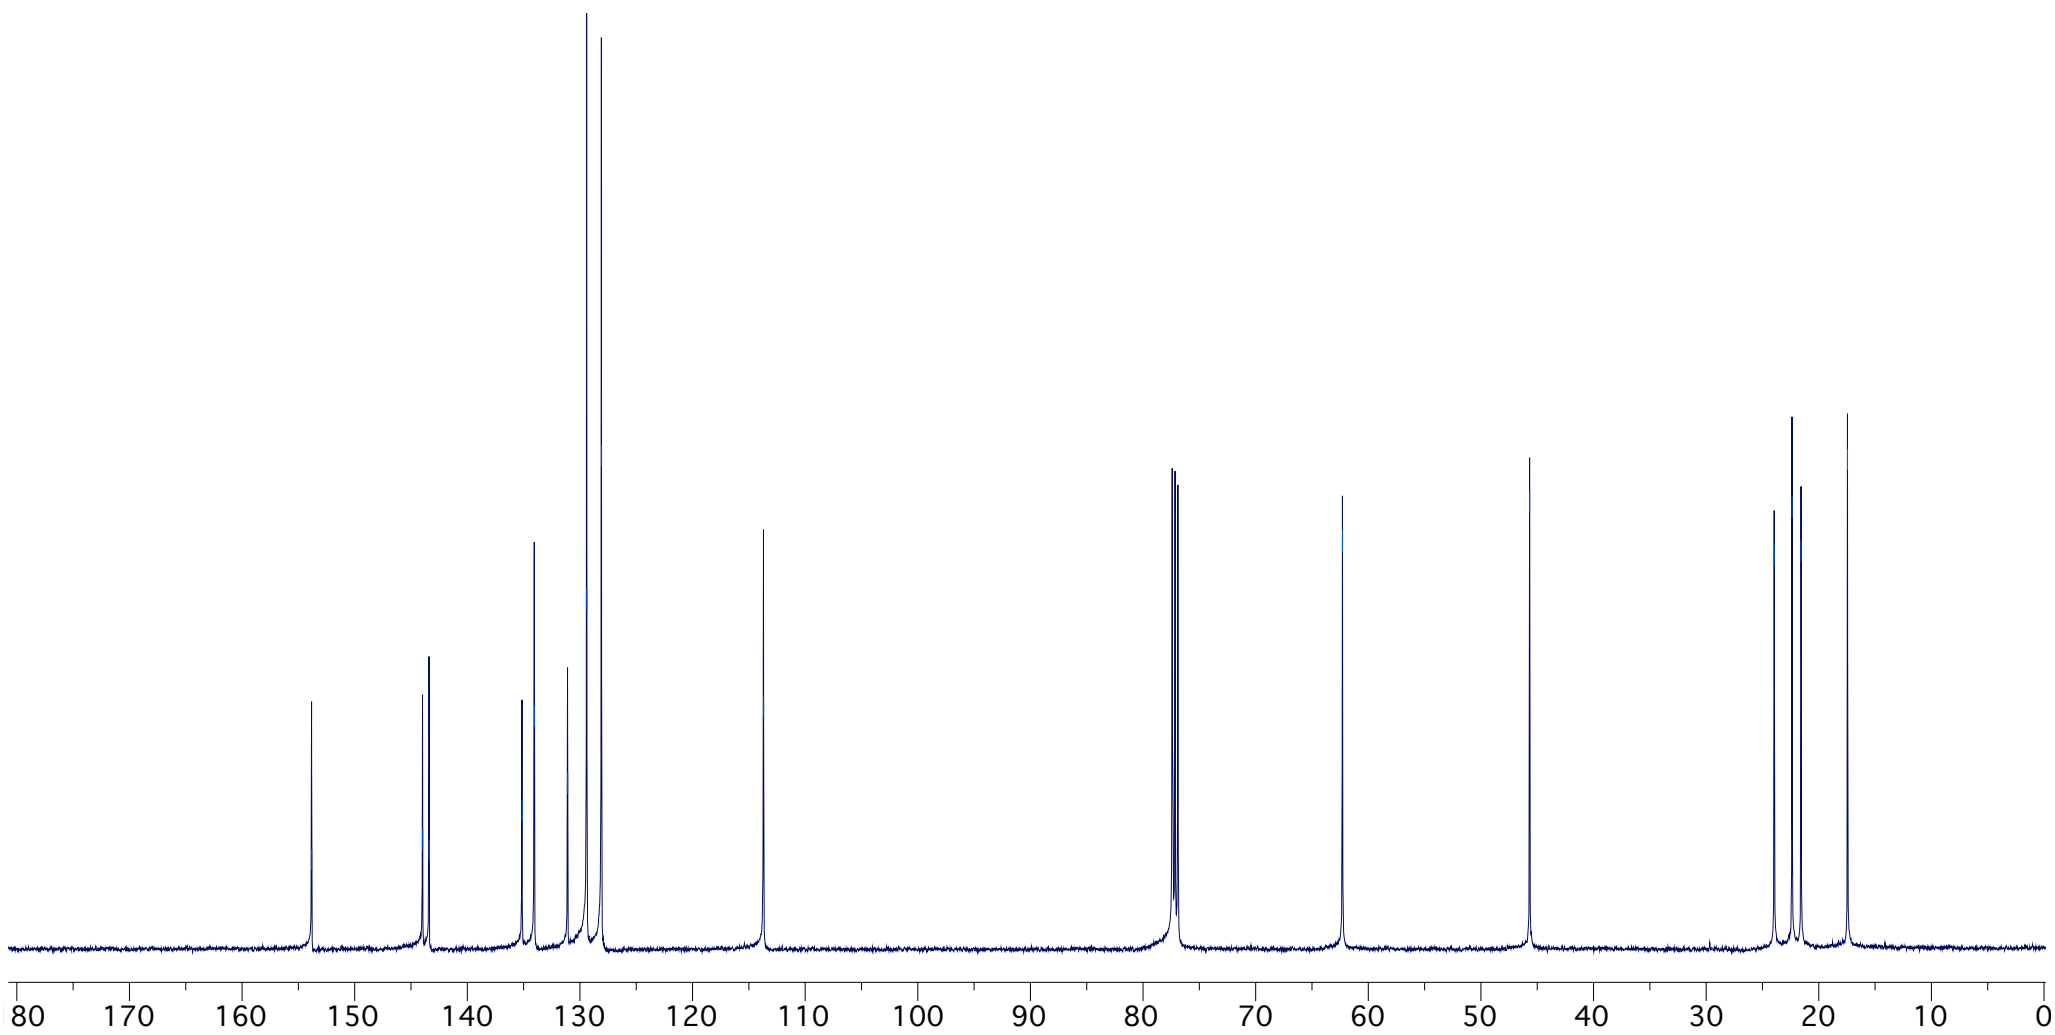

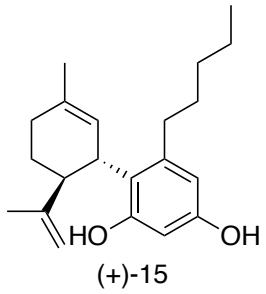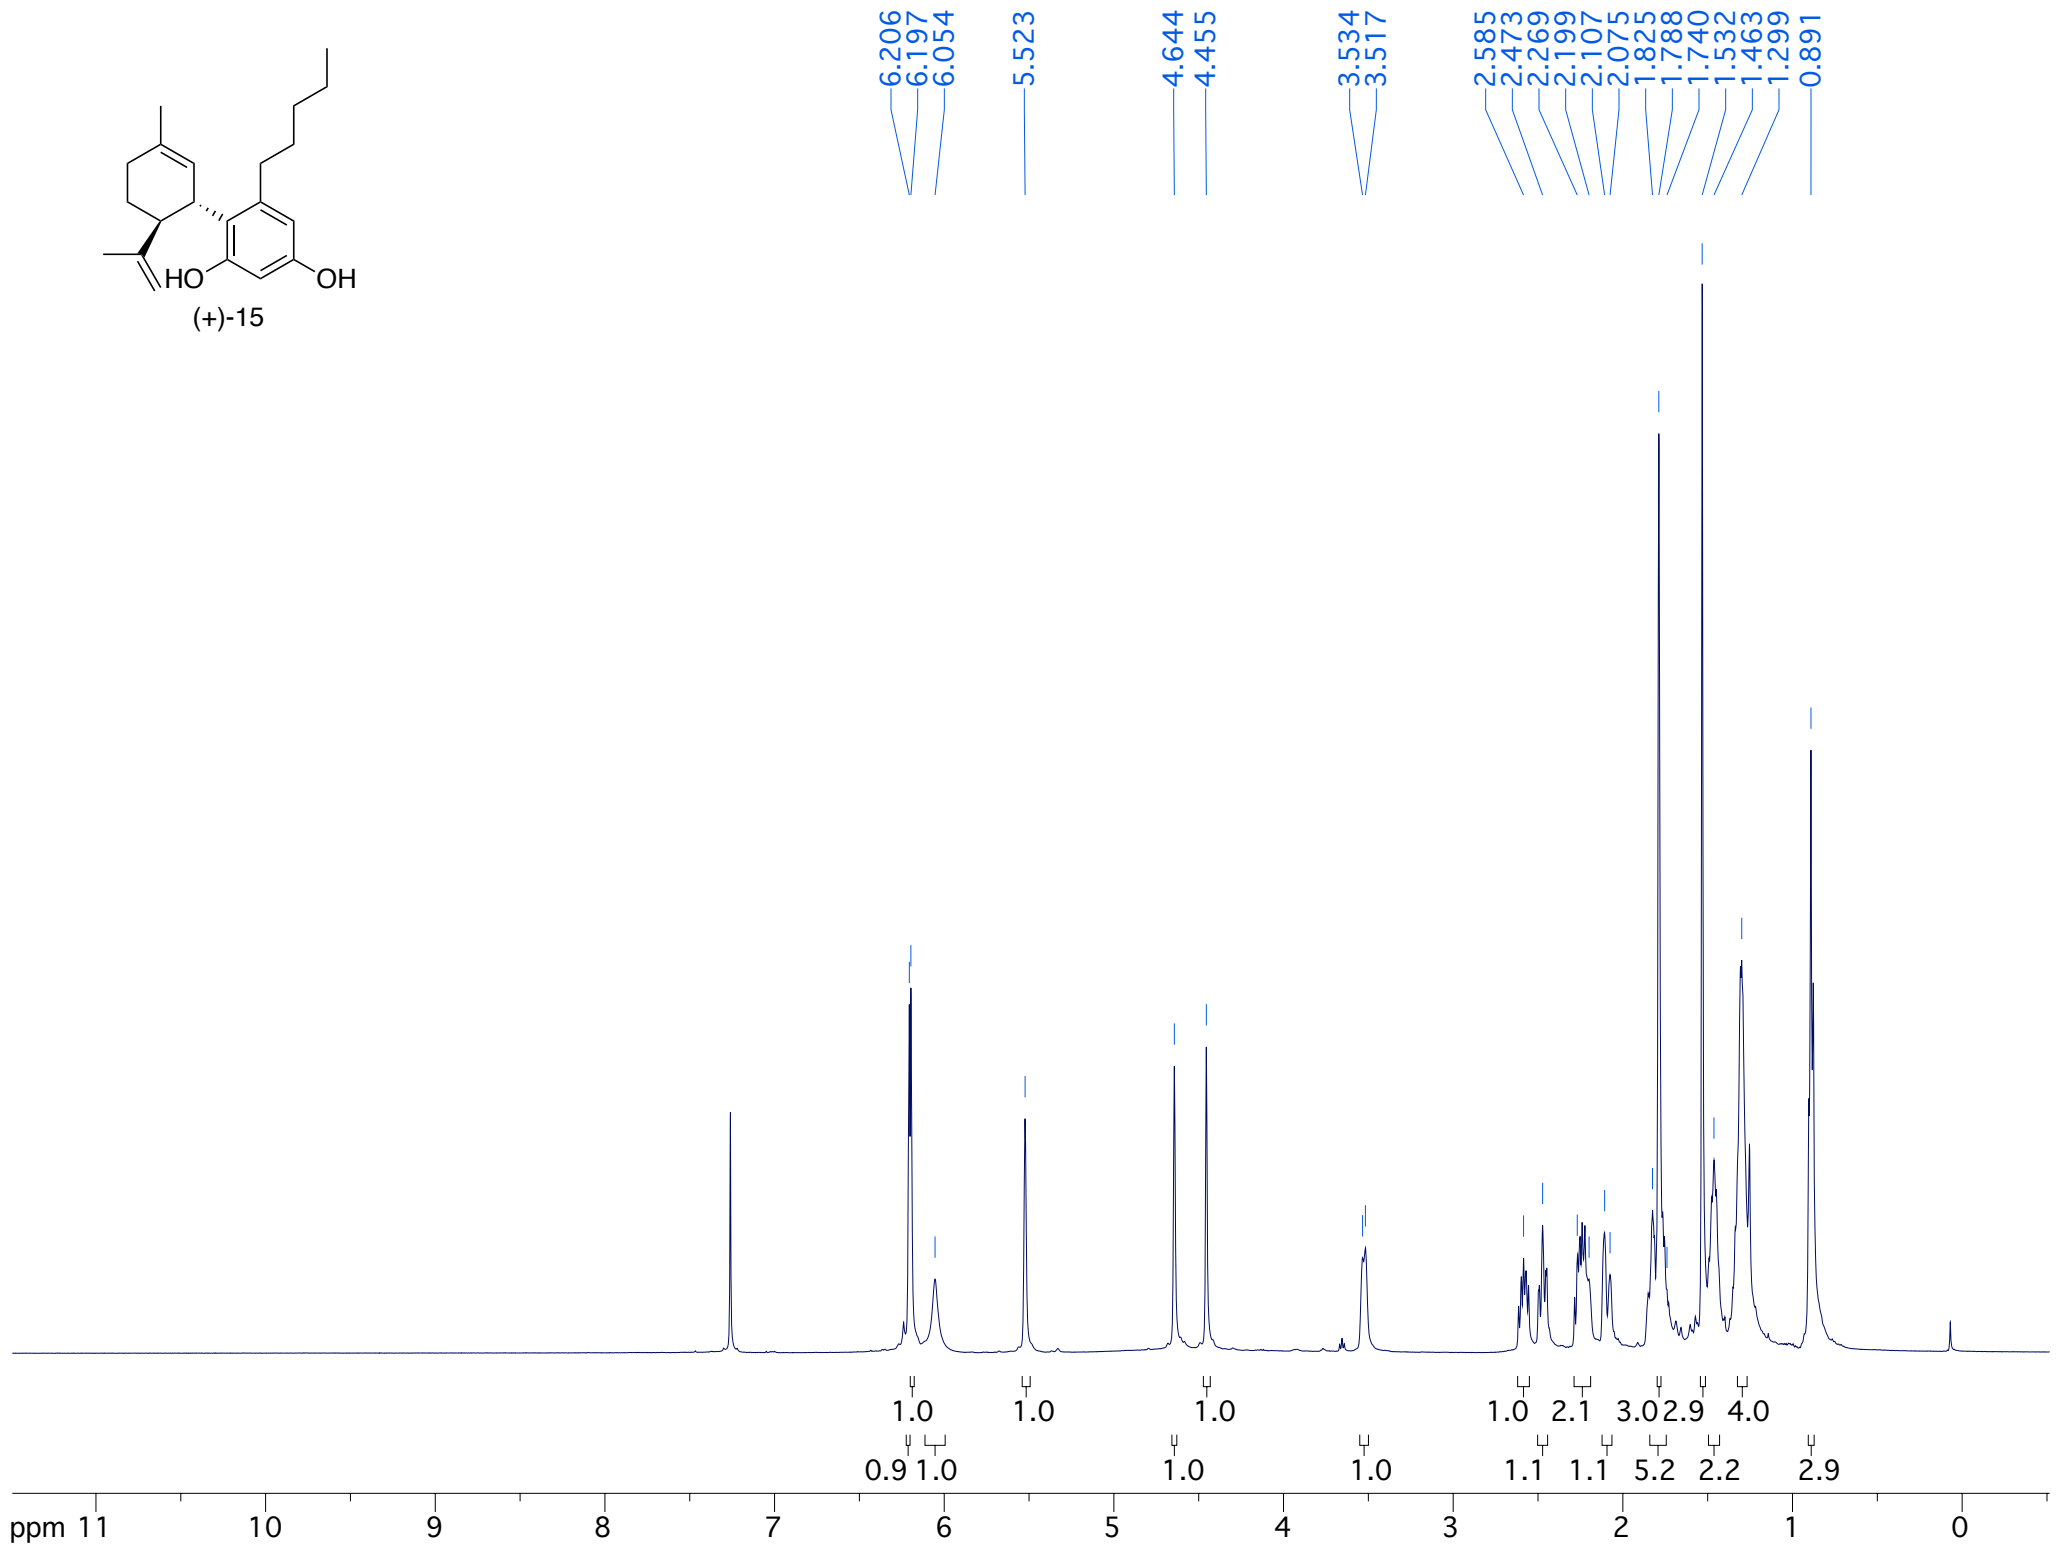

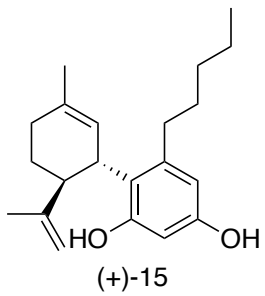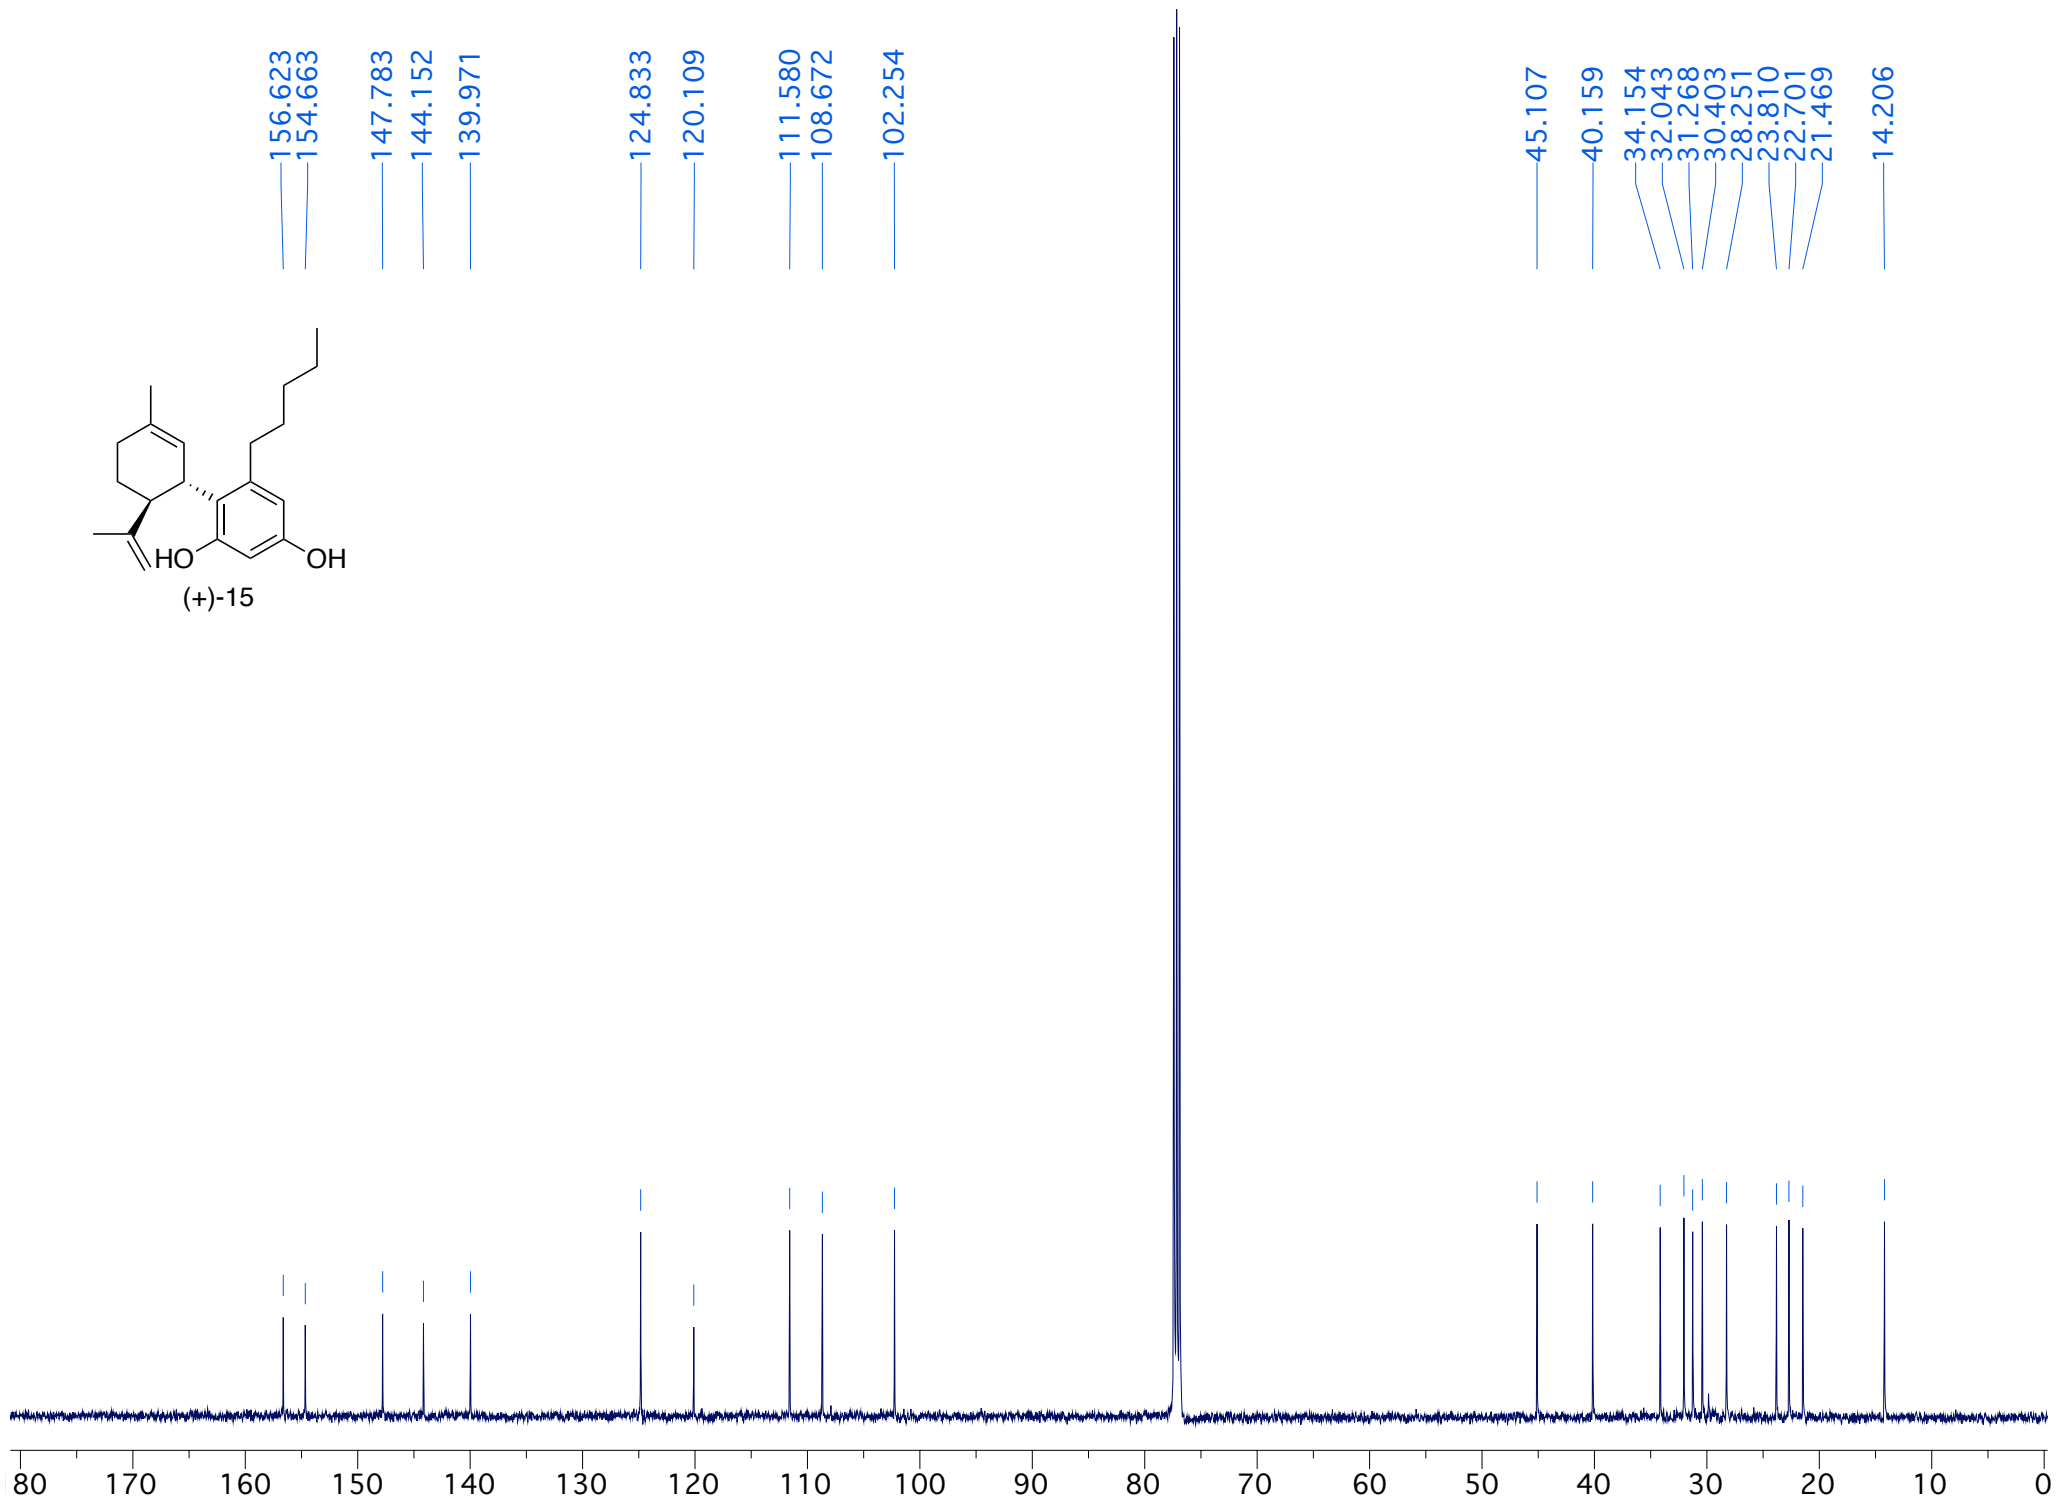

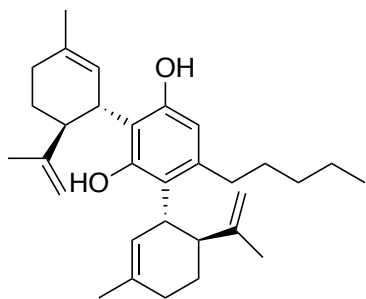

(+)-16

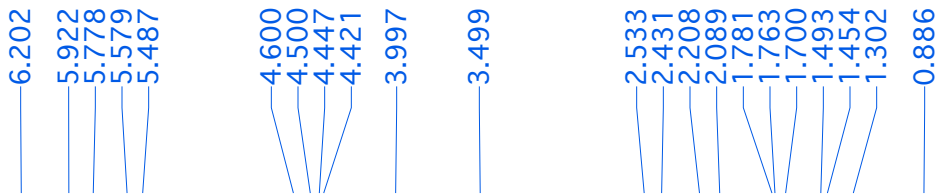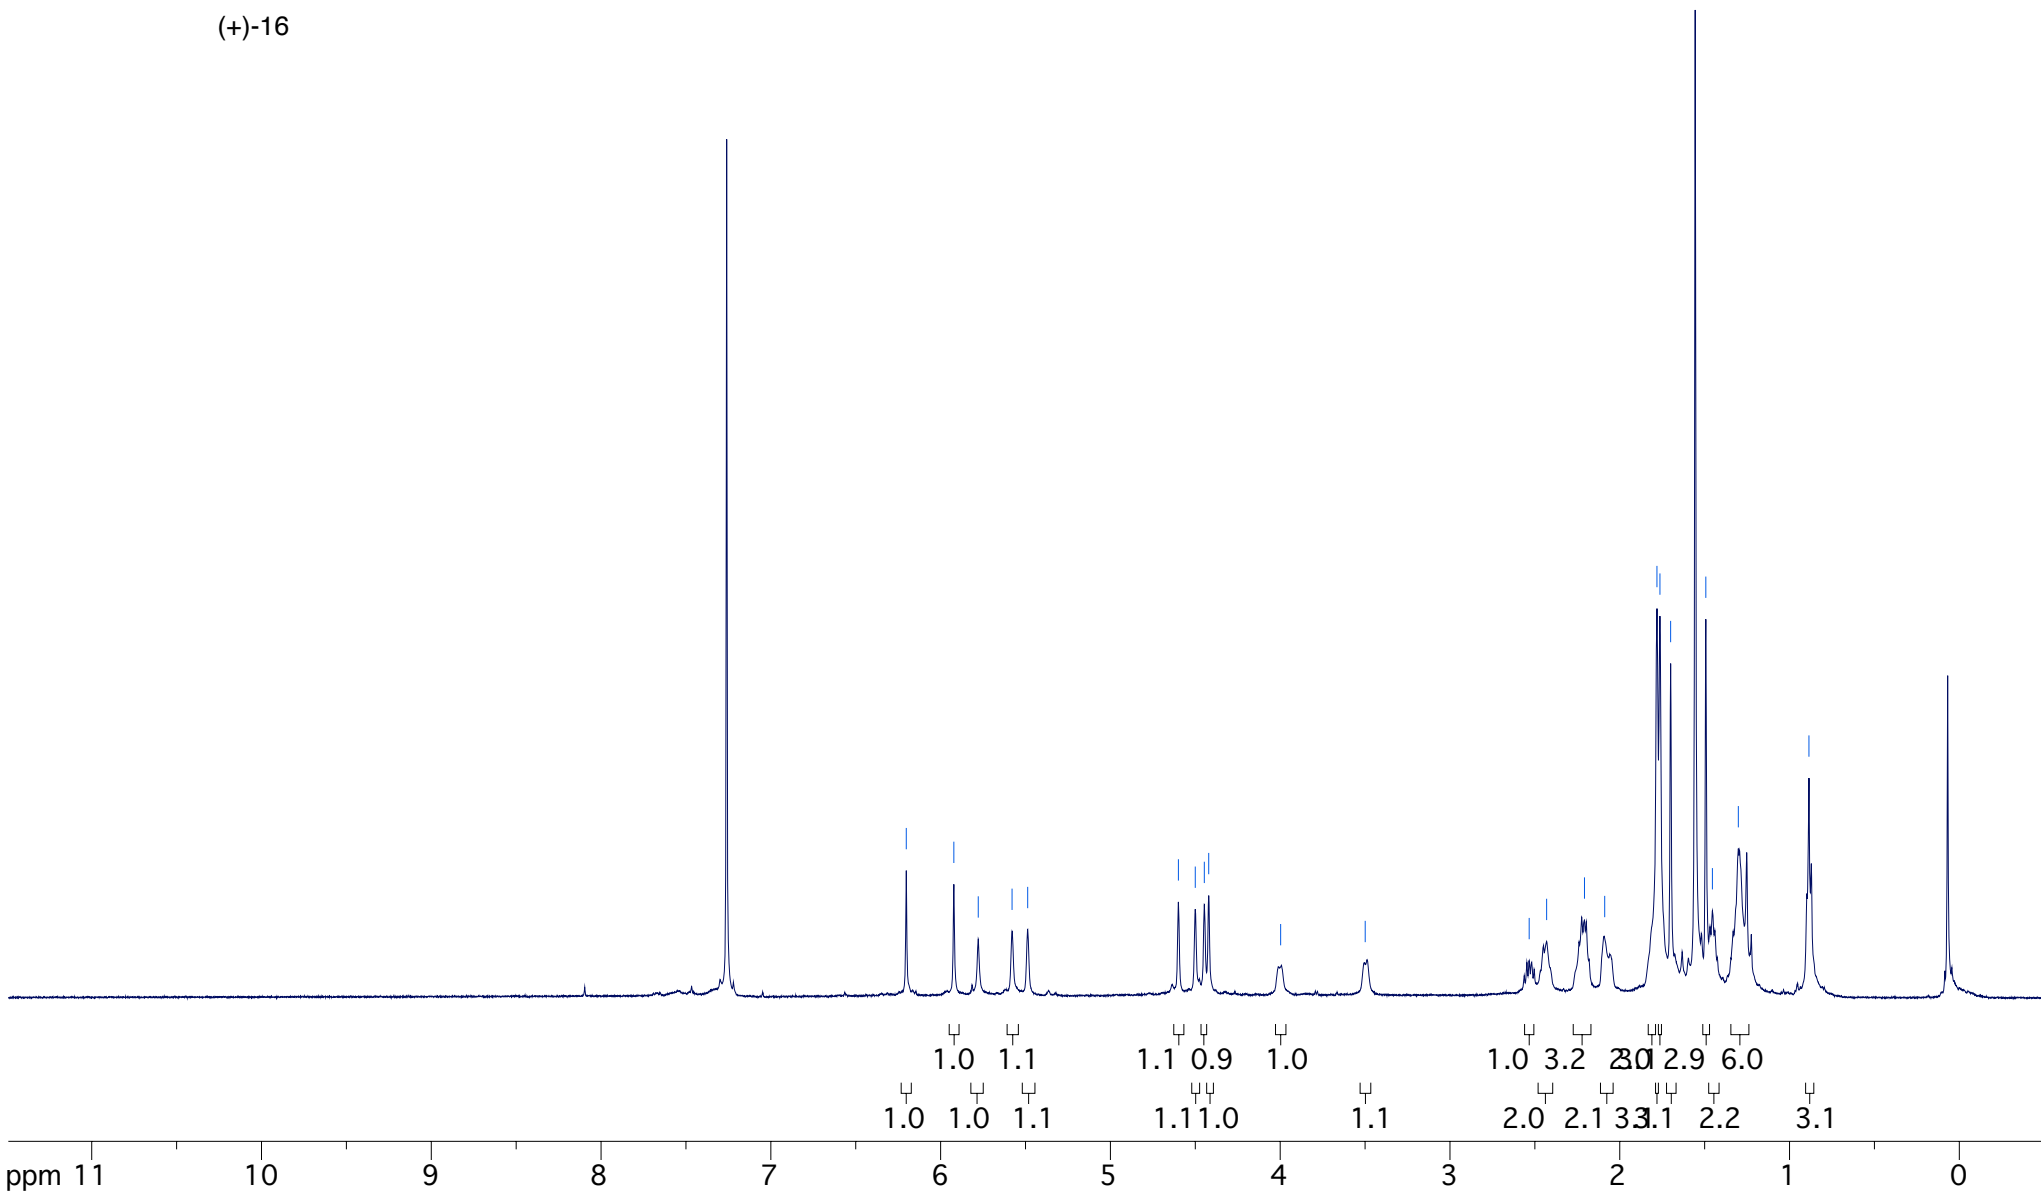

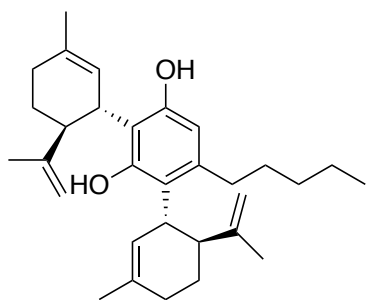

(+)-16

156.488  
154.579  
147.647  
143.949  
139.744  
132.127  
131.930  
128.542  
128.444  
124.709  
119.877  
115.262  
111.394  
108.517  
102.104

44.932  
44.319  
40.445  
40.007  
33.998  
33.897  
31.983  
31.889  
31.114  
30.434  
30.249  
29.688  
28.103  
23.627  
22.545  
21.475  
21.322  
14.046

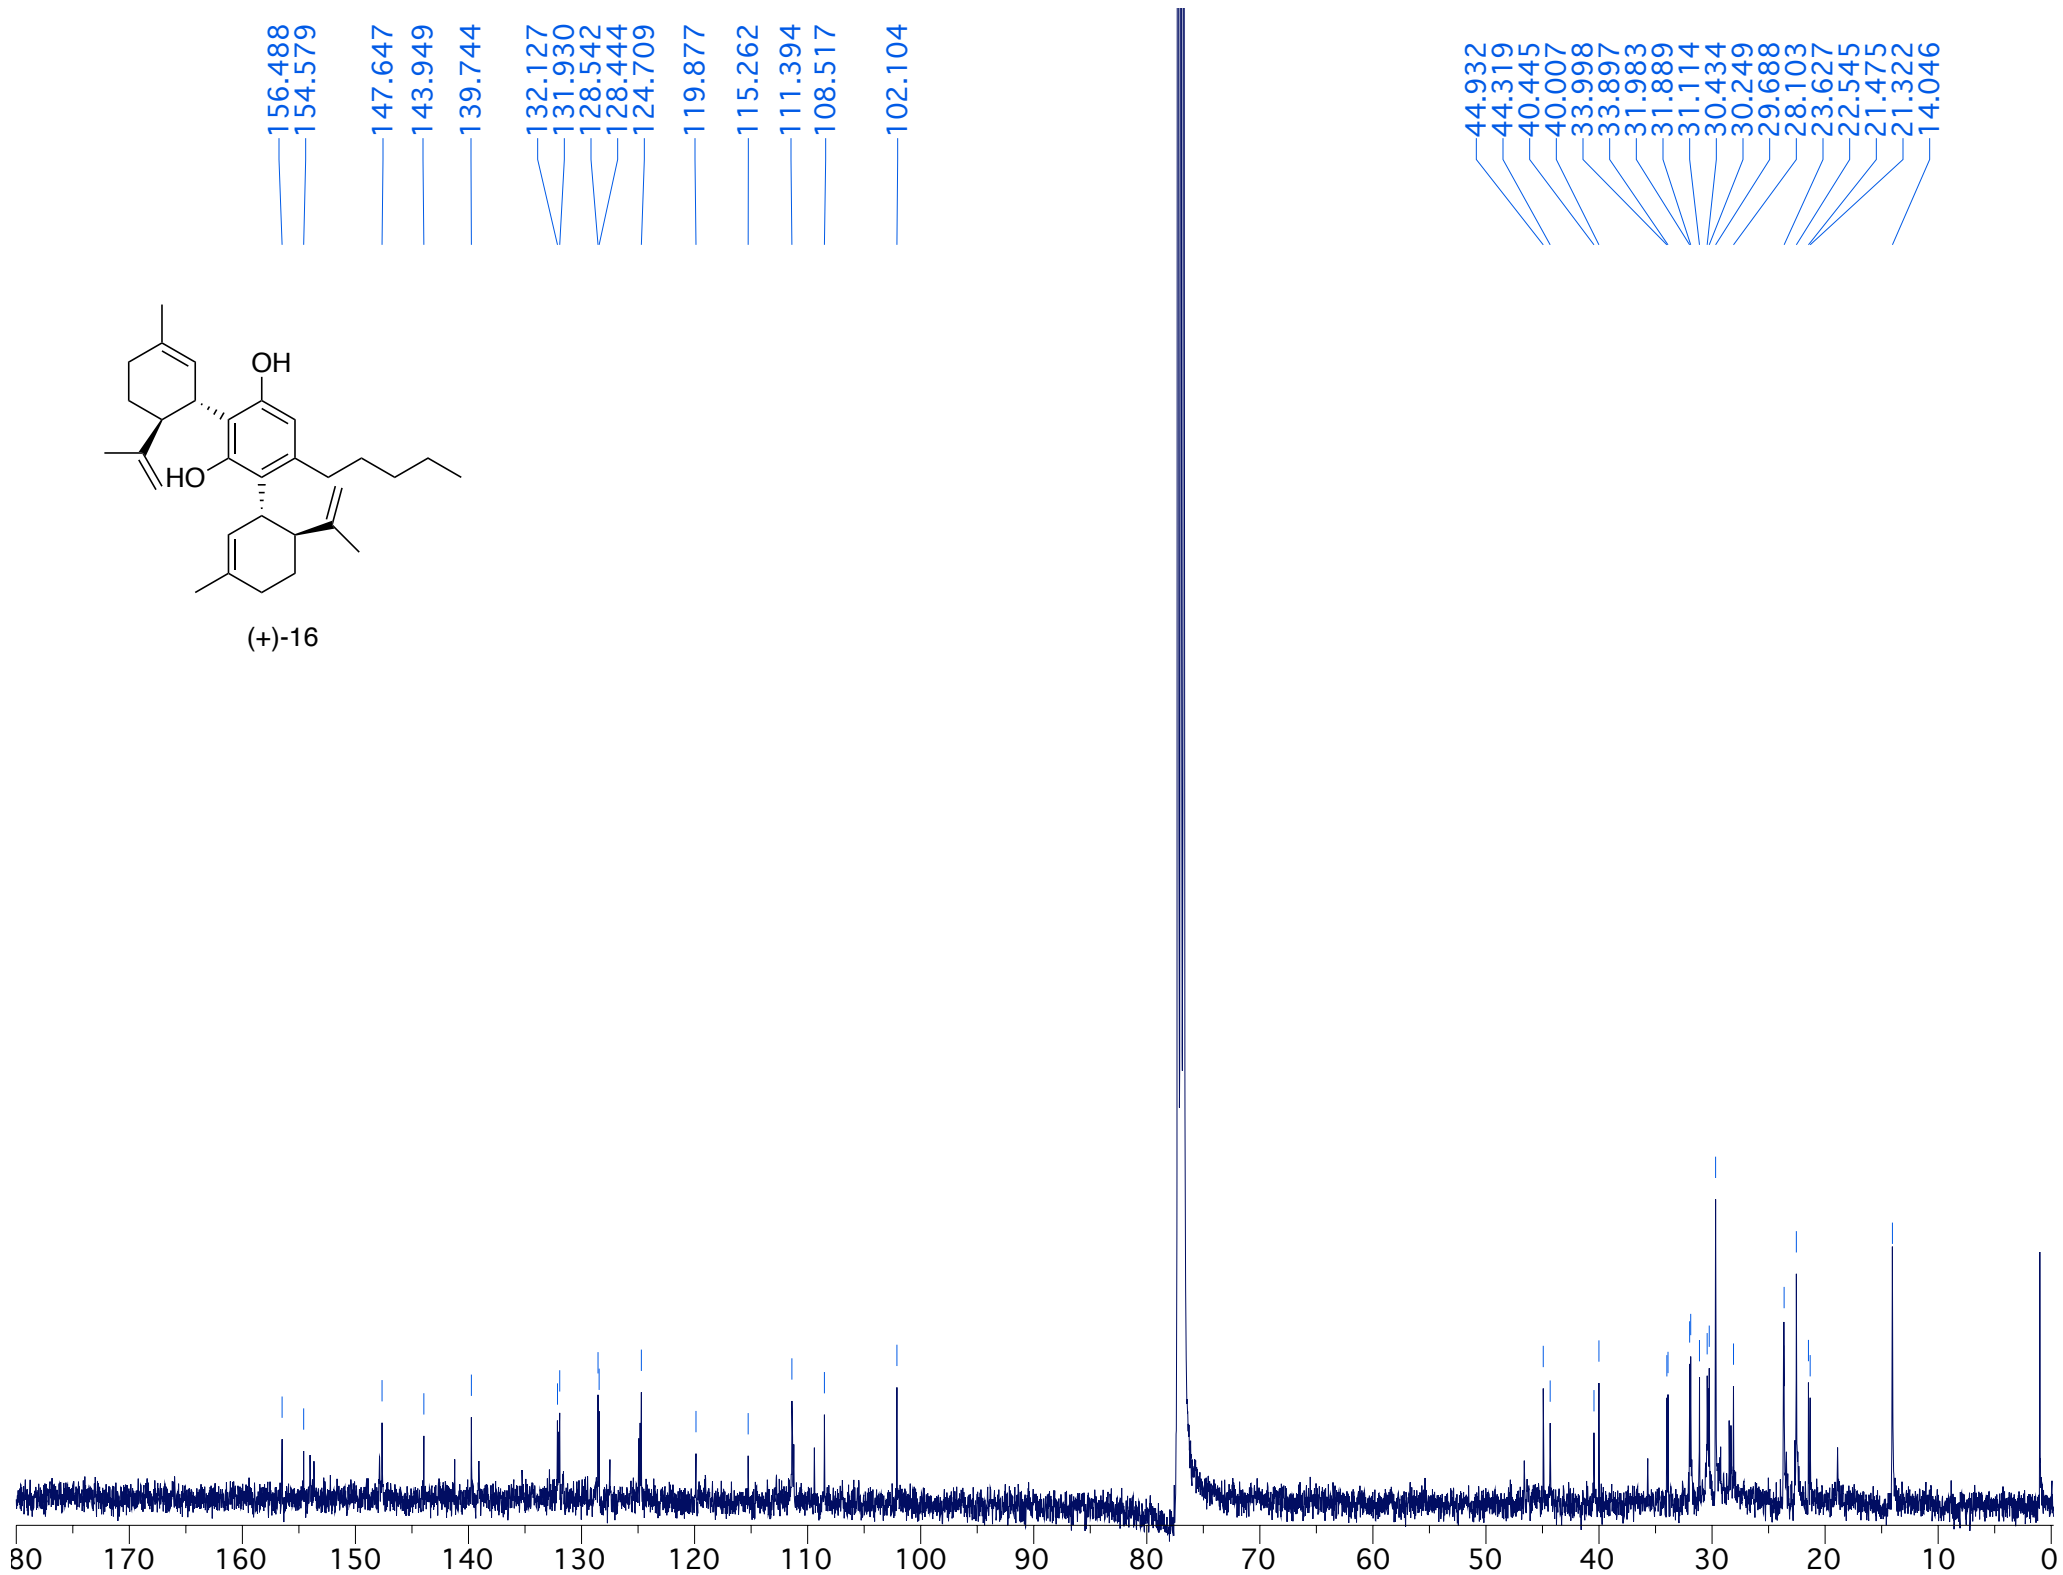

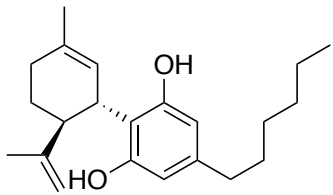

(+)-17

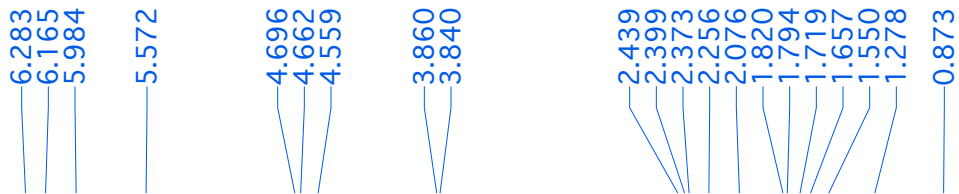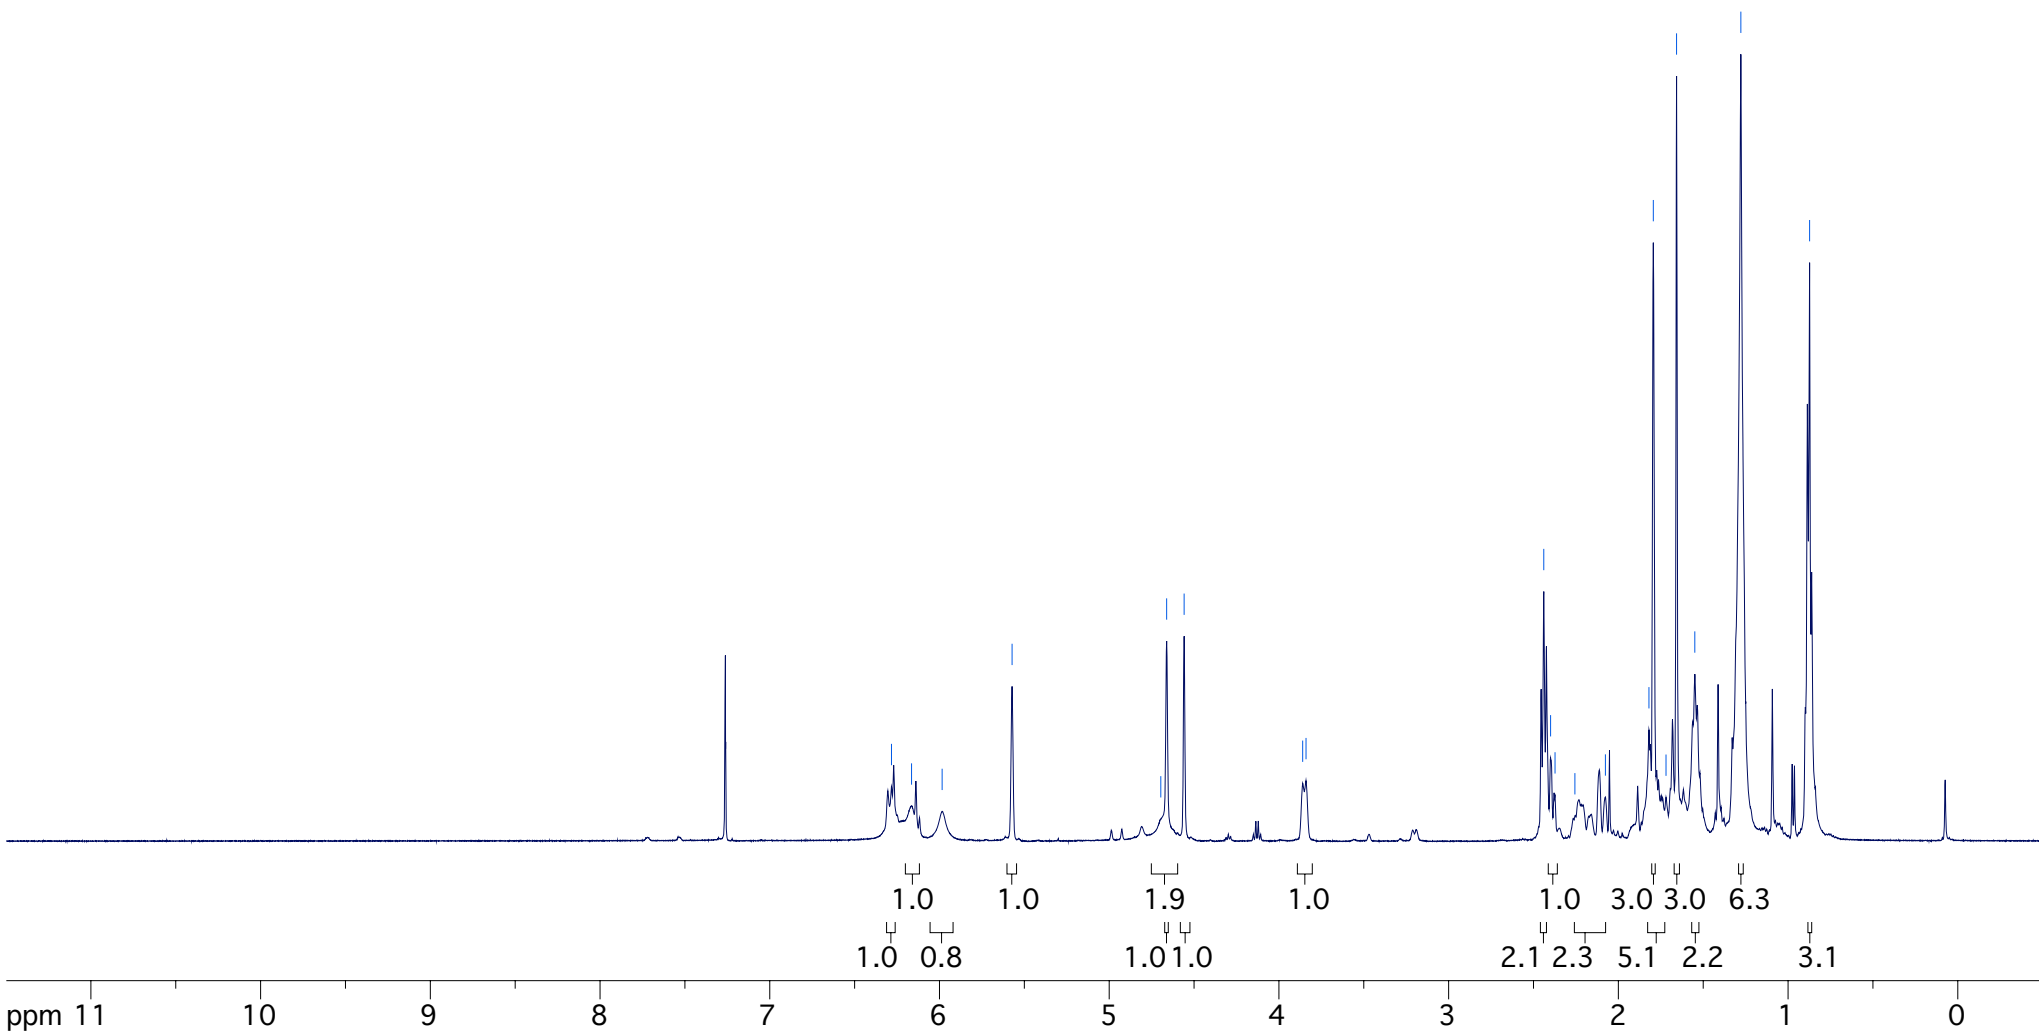

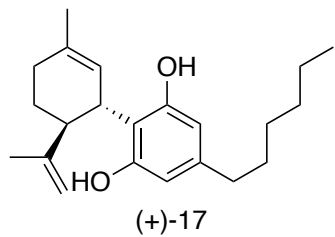

156.218  
154.044  
149.520  
143.185  
140.202

124.248

113.873  
110.979  
109.924  
108.119

46.289  
37.394  
35.660  
31.868  
31.067  
30.539  
29.096  
28.540  
23.831  
22.745  
20.663  
14.235

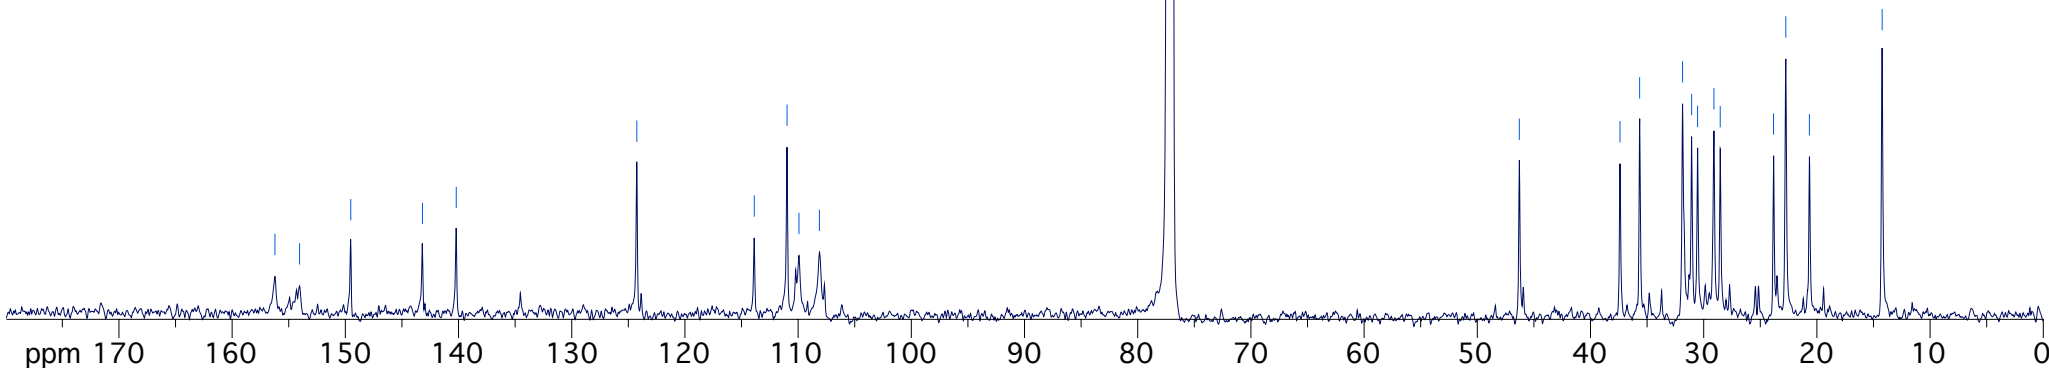

ppm 170 160 150 140 130 120 110 100 90 80 70 60 50 40 30 20 10 0



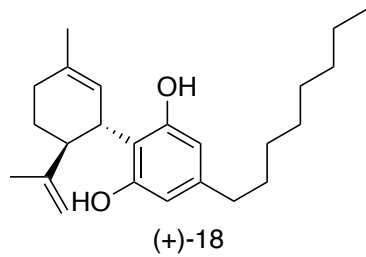

6.276  
6.166  
5.974  
5.569  
4.660  
4.557  
3.851  
3.834  
2.435  
2.389  
2.226  
2.116  
2.070  
1.816  
1.792  
1.746  
1.653  
1.579  
1.277  
0.873

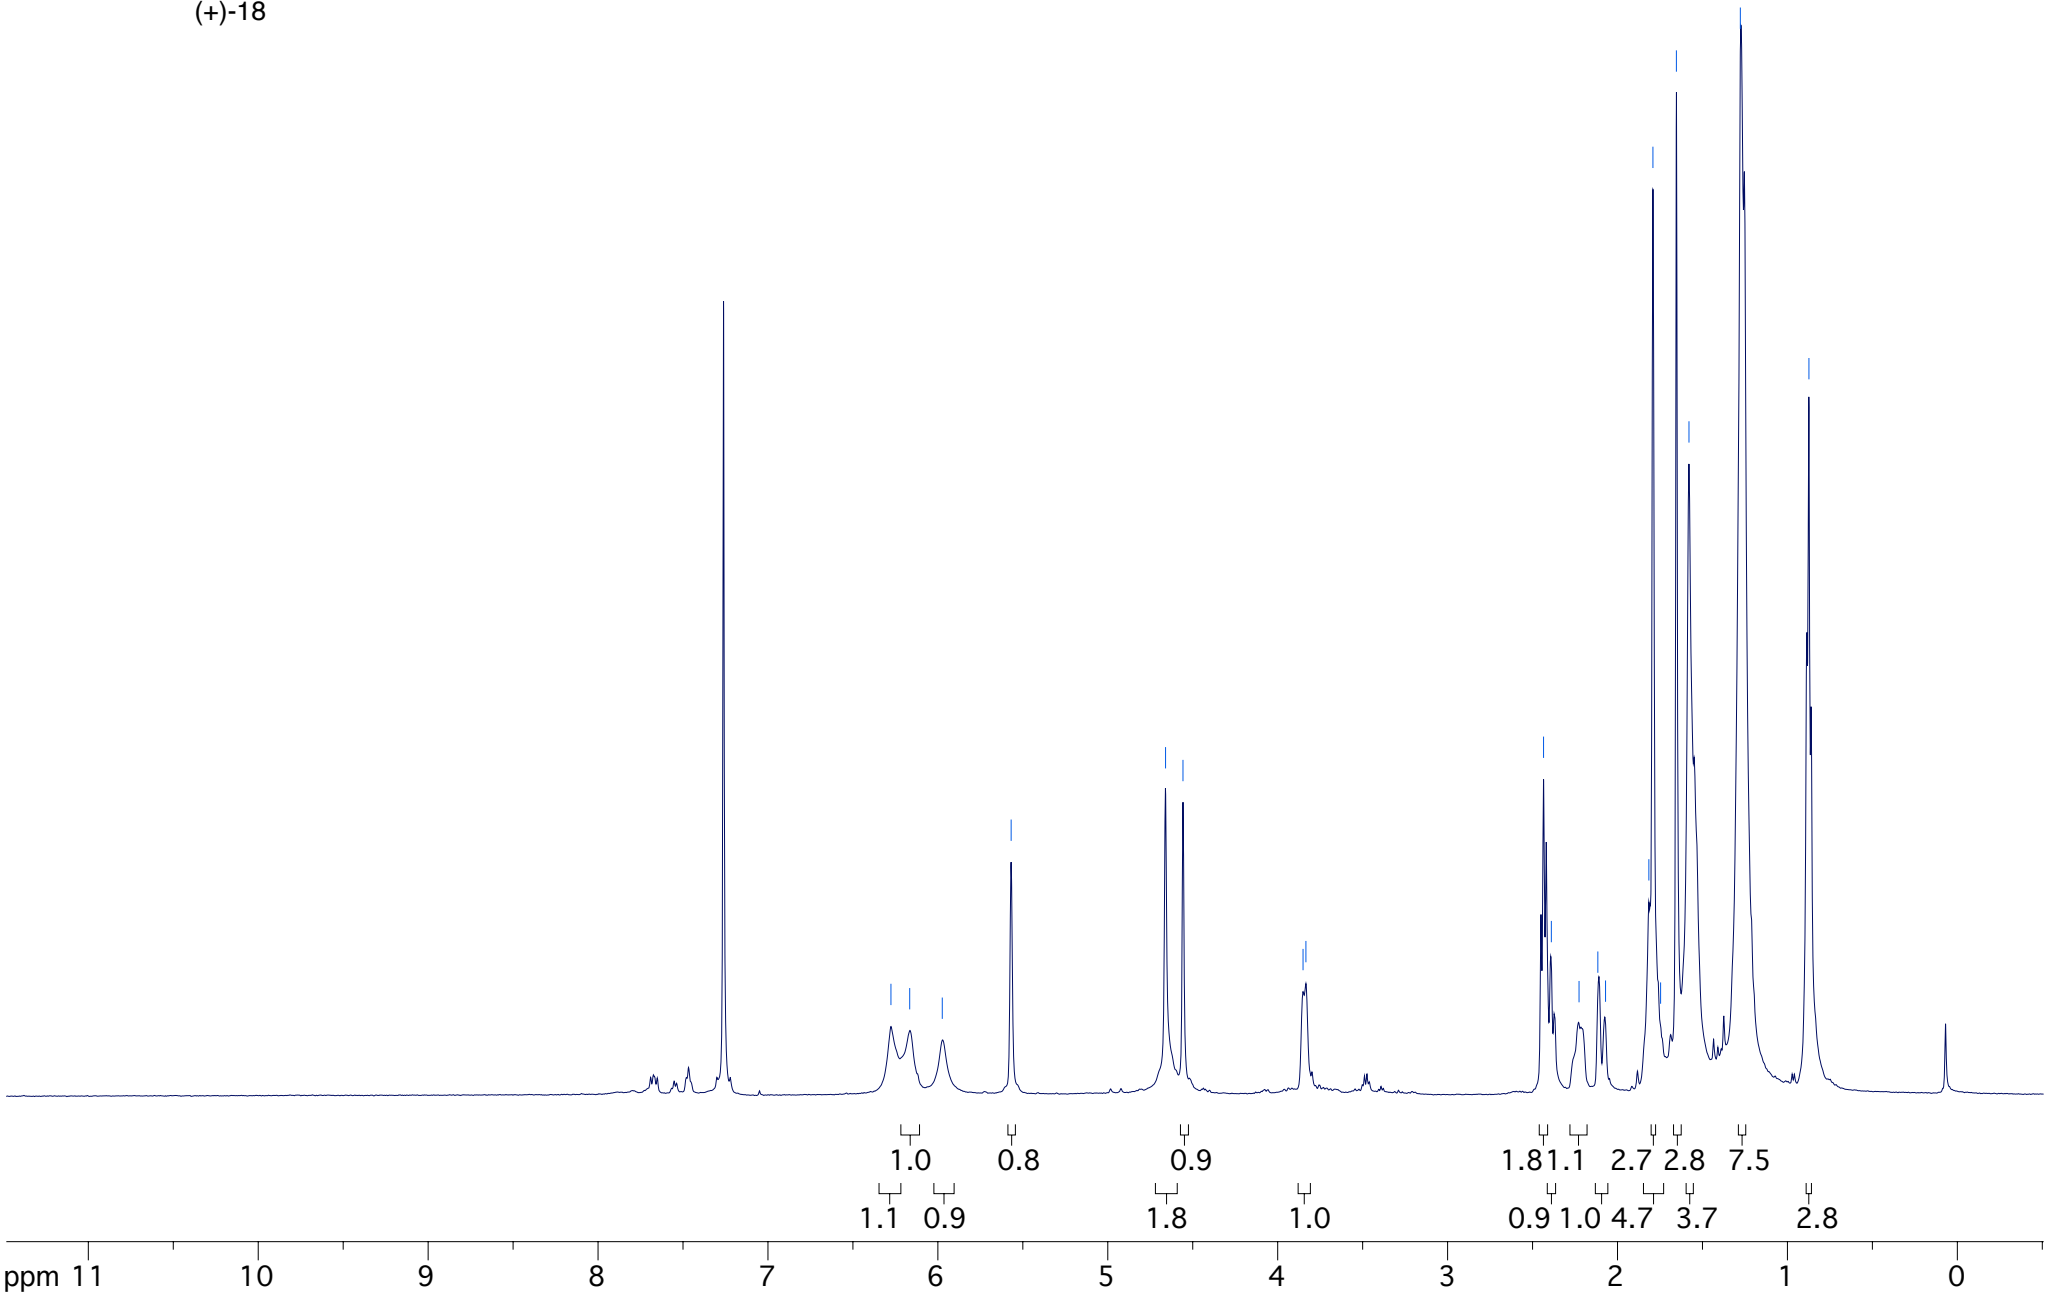

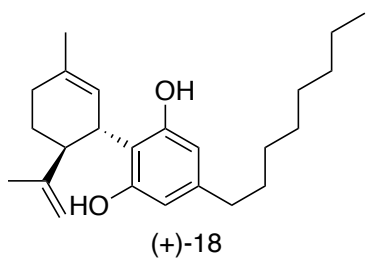

156.277  
154.061  
149.536  
143.198  
140.203

124.249

113.868  
110.975  
109.957  
108.099

46.285  
37.400  
35.663  
32.028  
31.110  
30.539  
29.618  
29.438  
29.402  
28.541  
23.833  
22.828  
20.675  
14.263

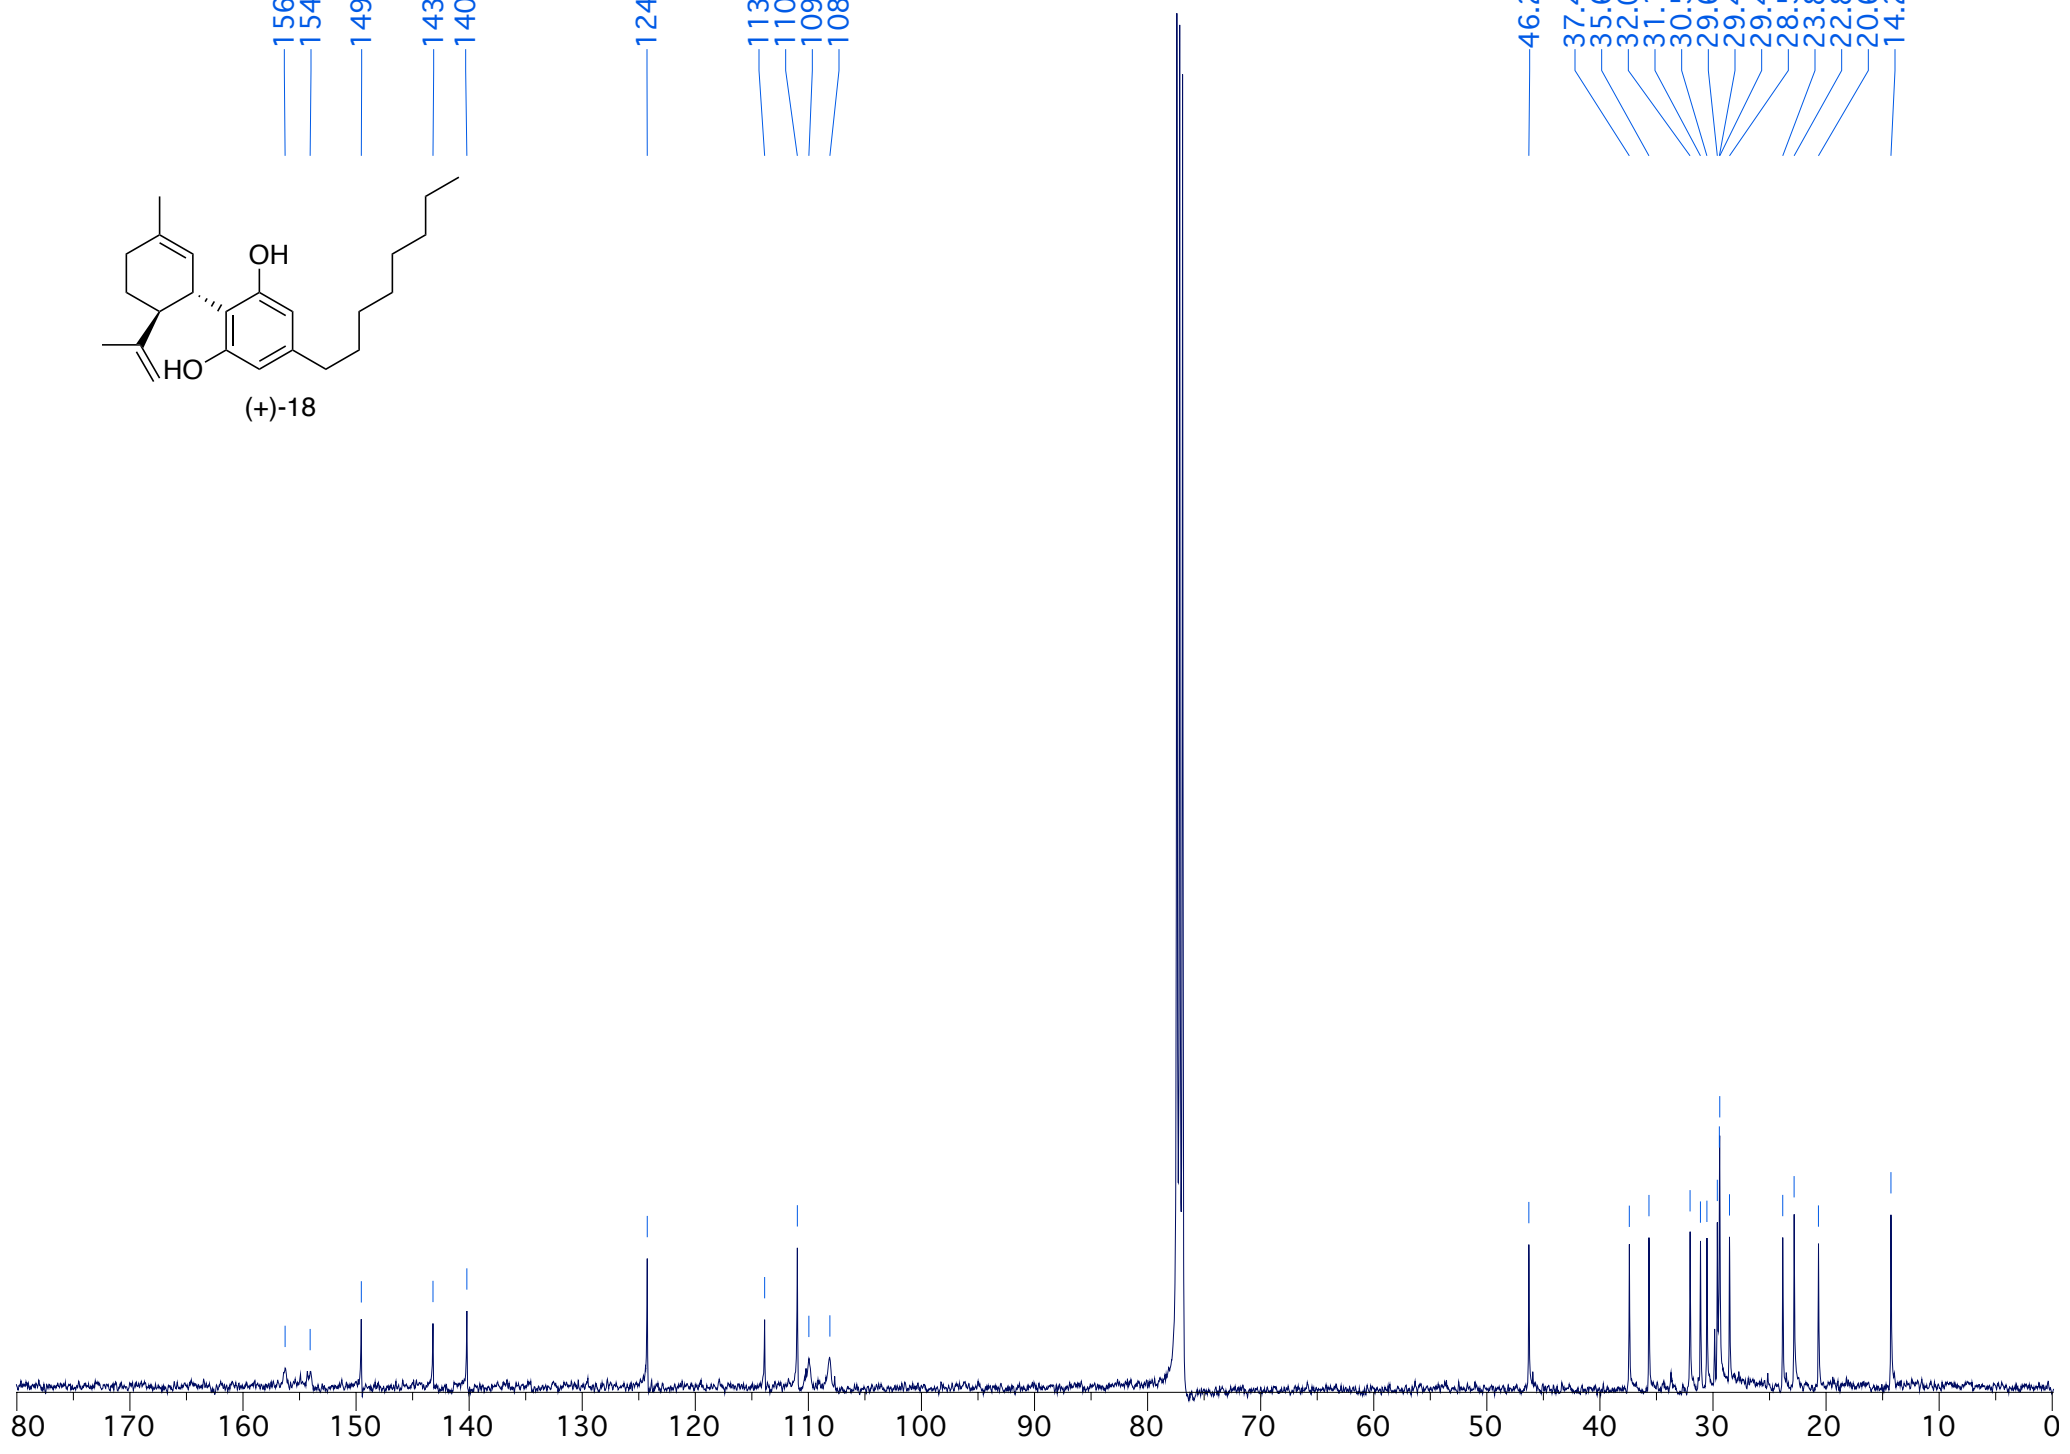

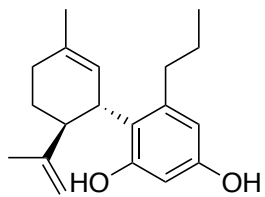

SI-3

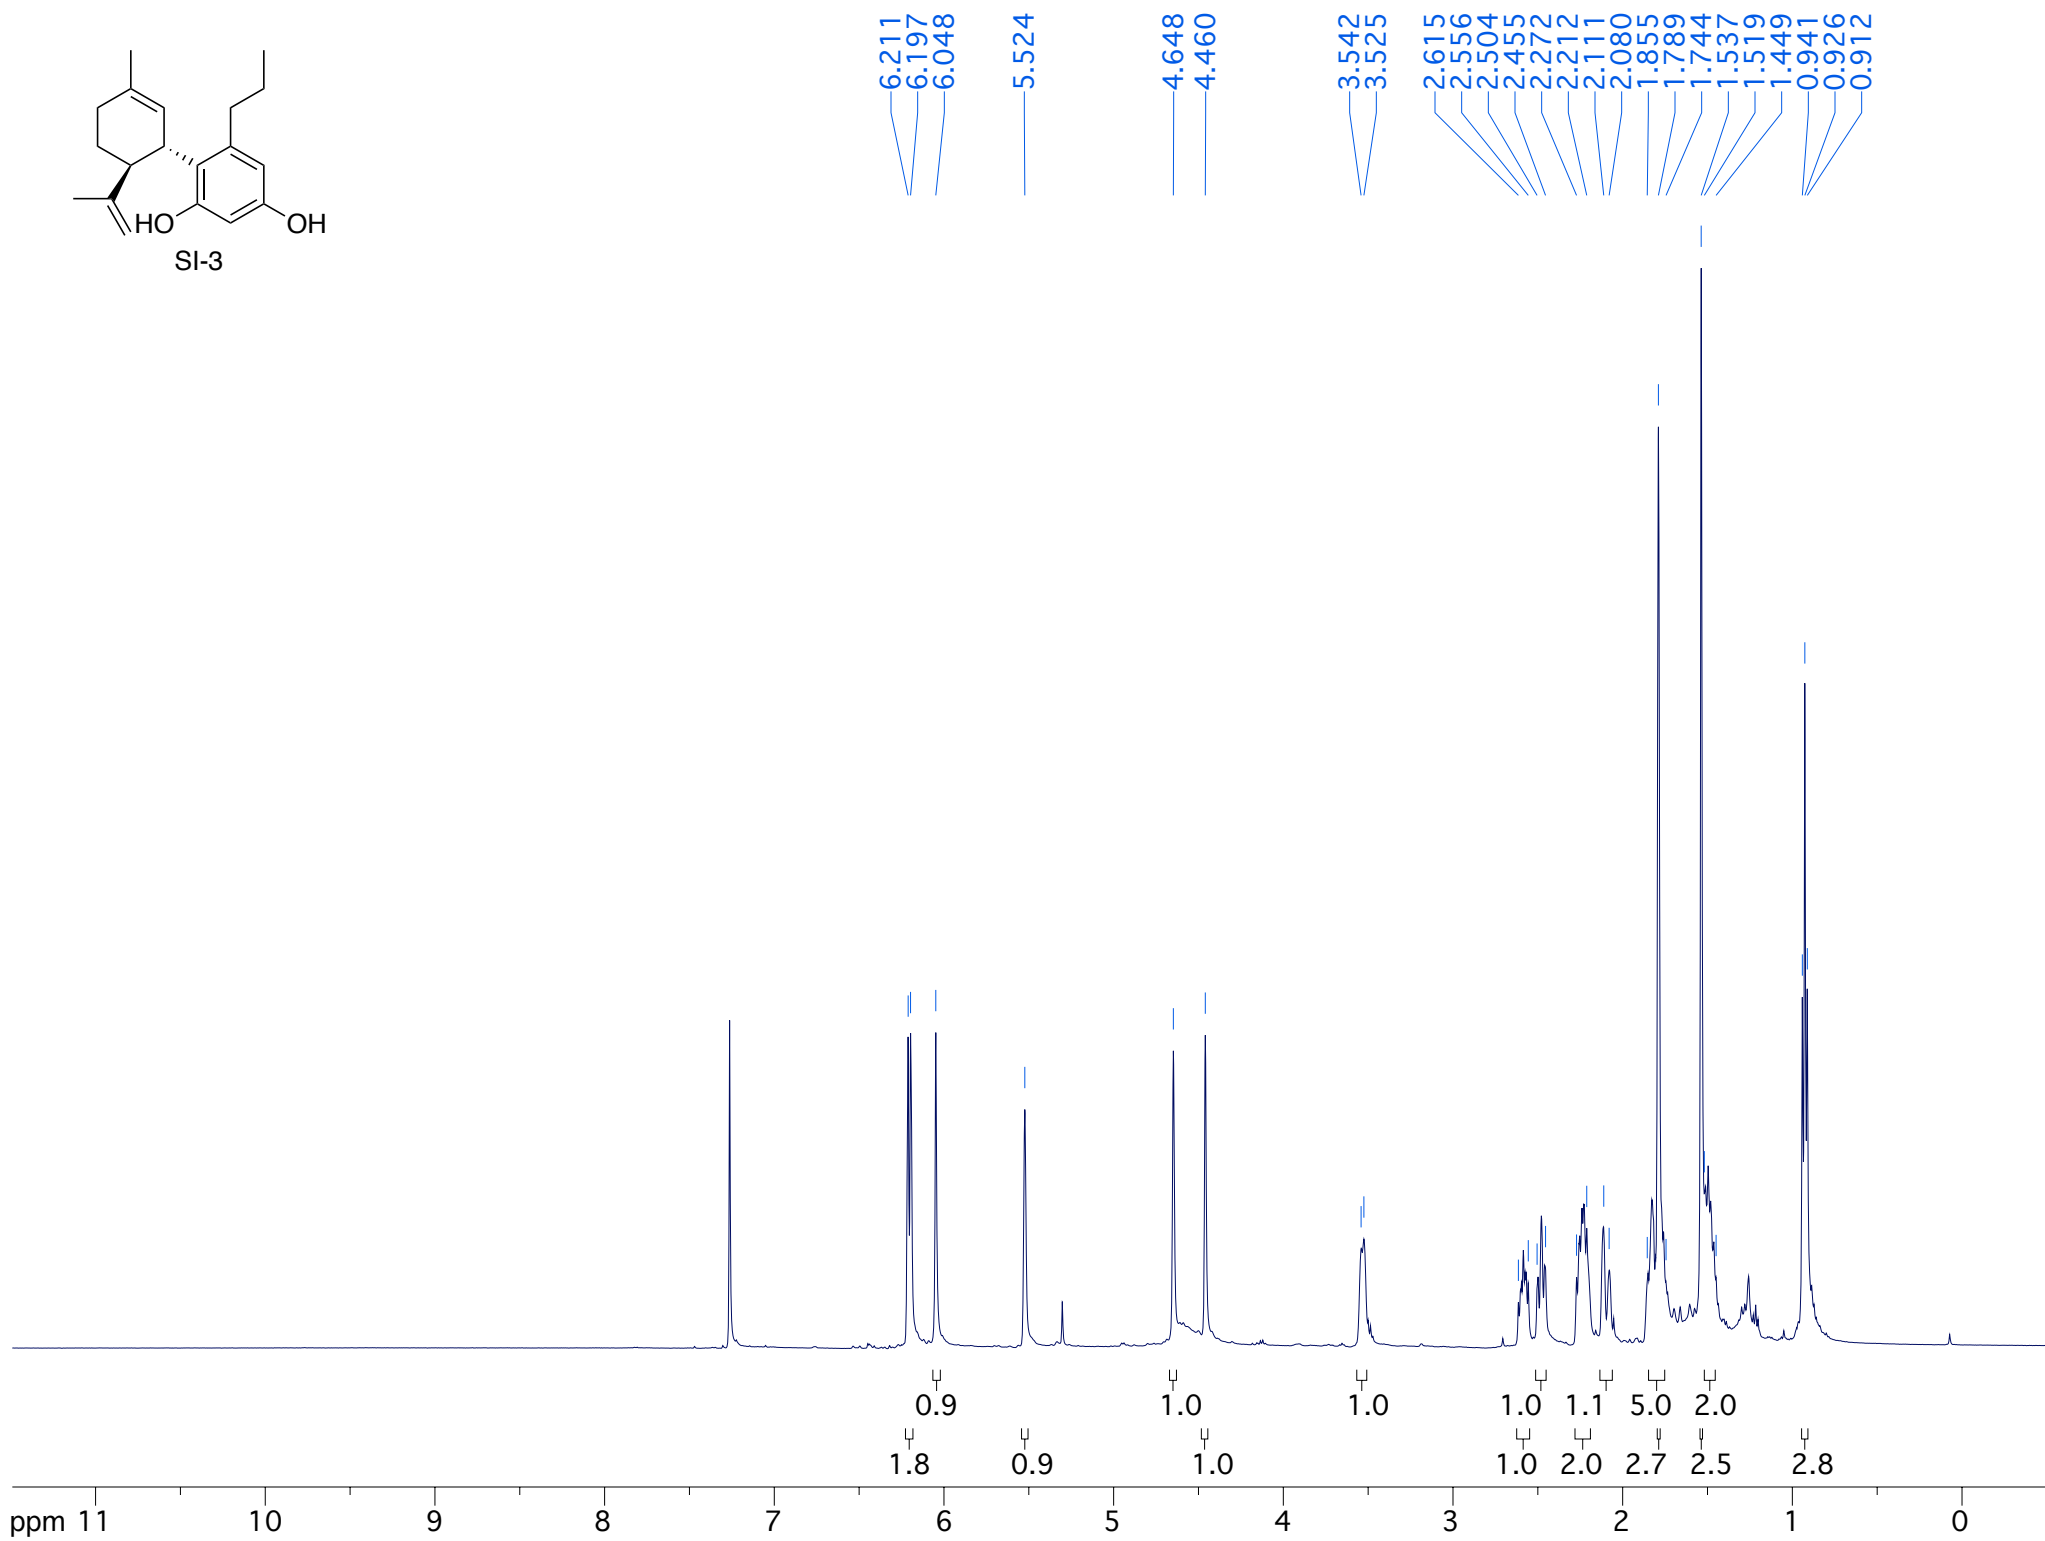

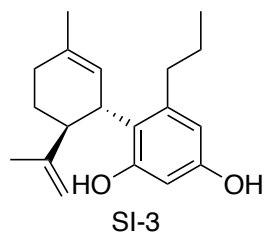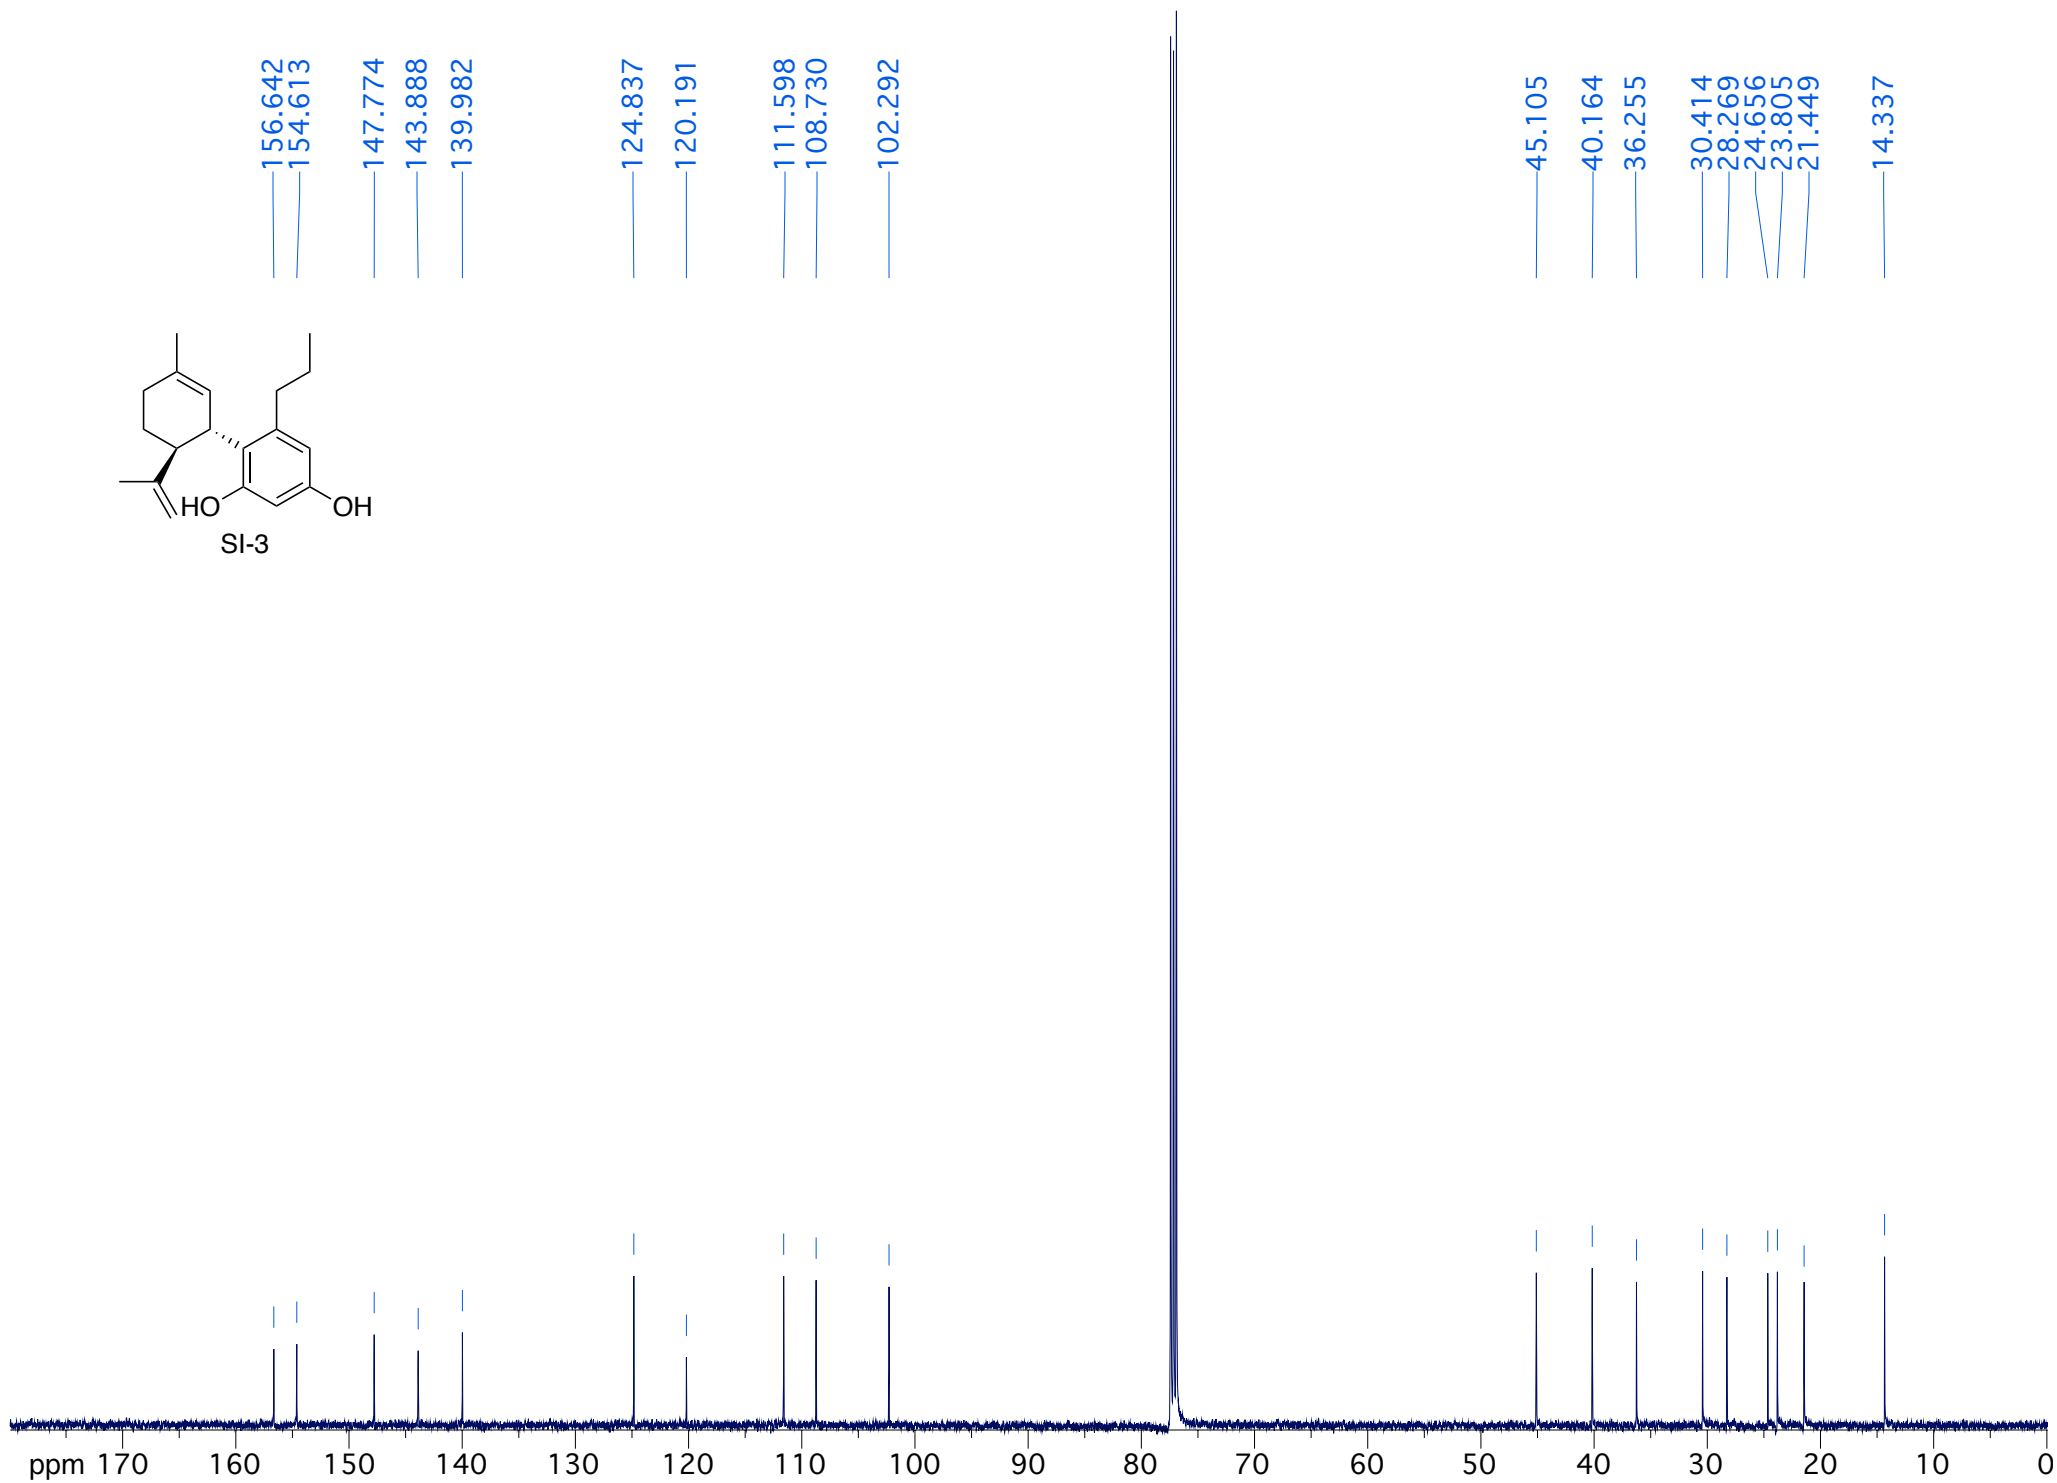

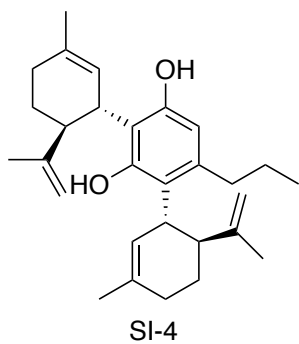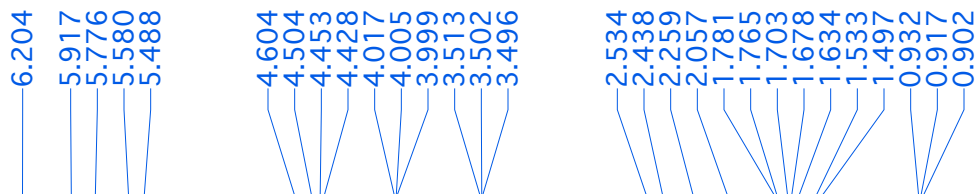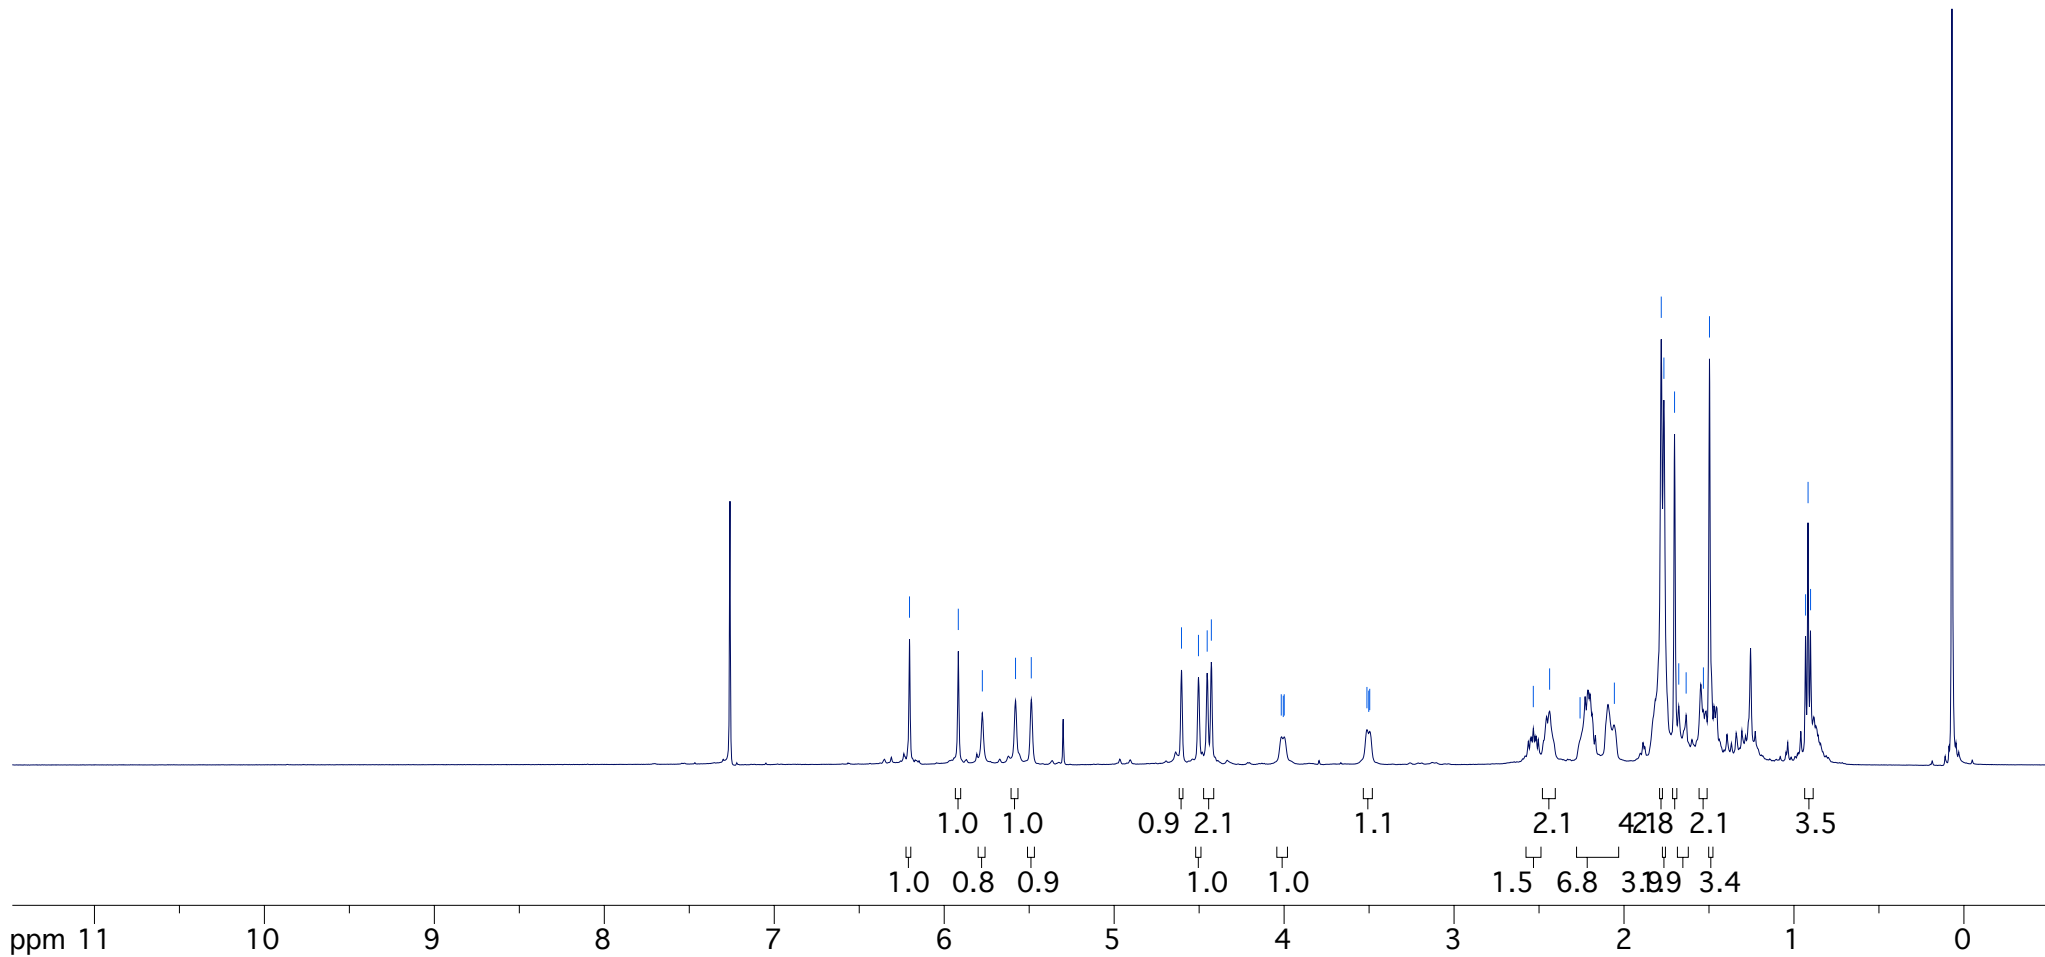

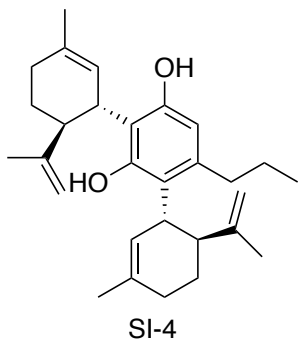

154.183  
153.851  
148.047  
147.791  
141.124  
139.904  
139.242

125.152  
125.014  
119.274  
115.492  
111.513  
109.677

46.779  
44.498  
40.633  
36.198  
35.871  
30.605  
30.537  
28.668  
28.522  
24.676  
23.806  
21.627  
19.079  
14.438

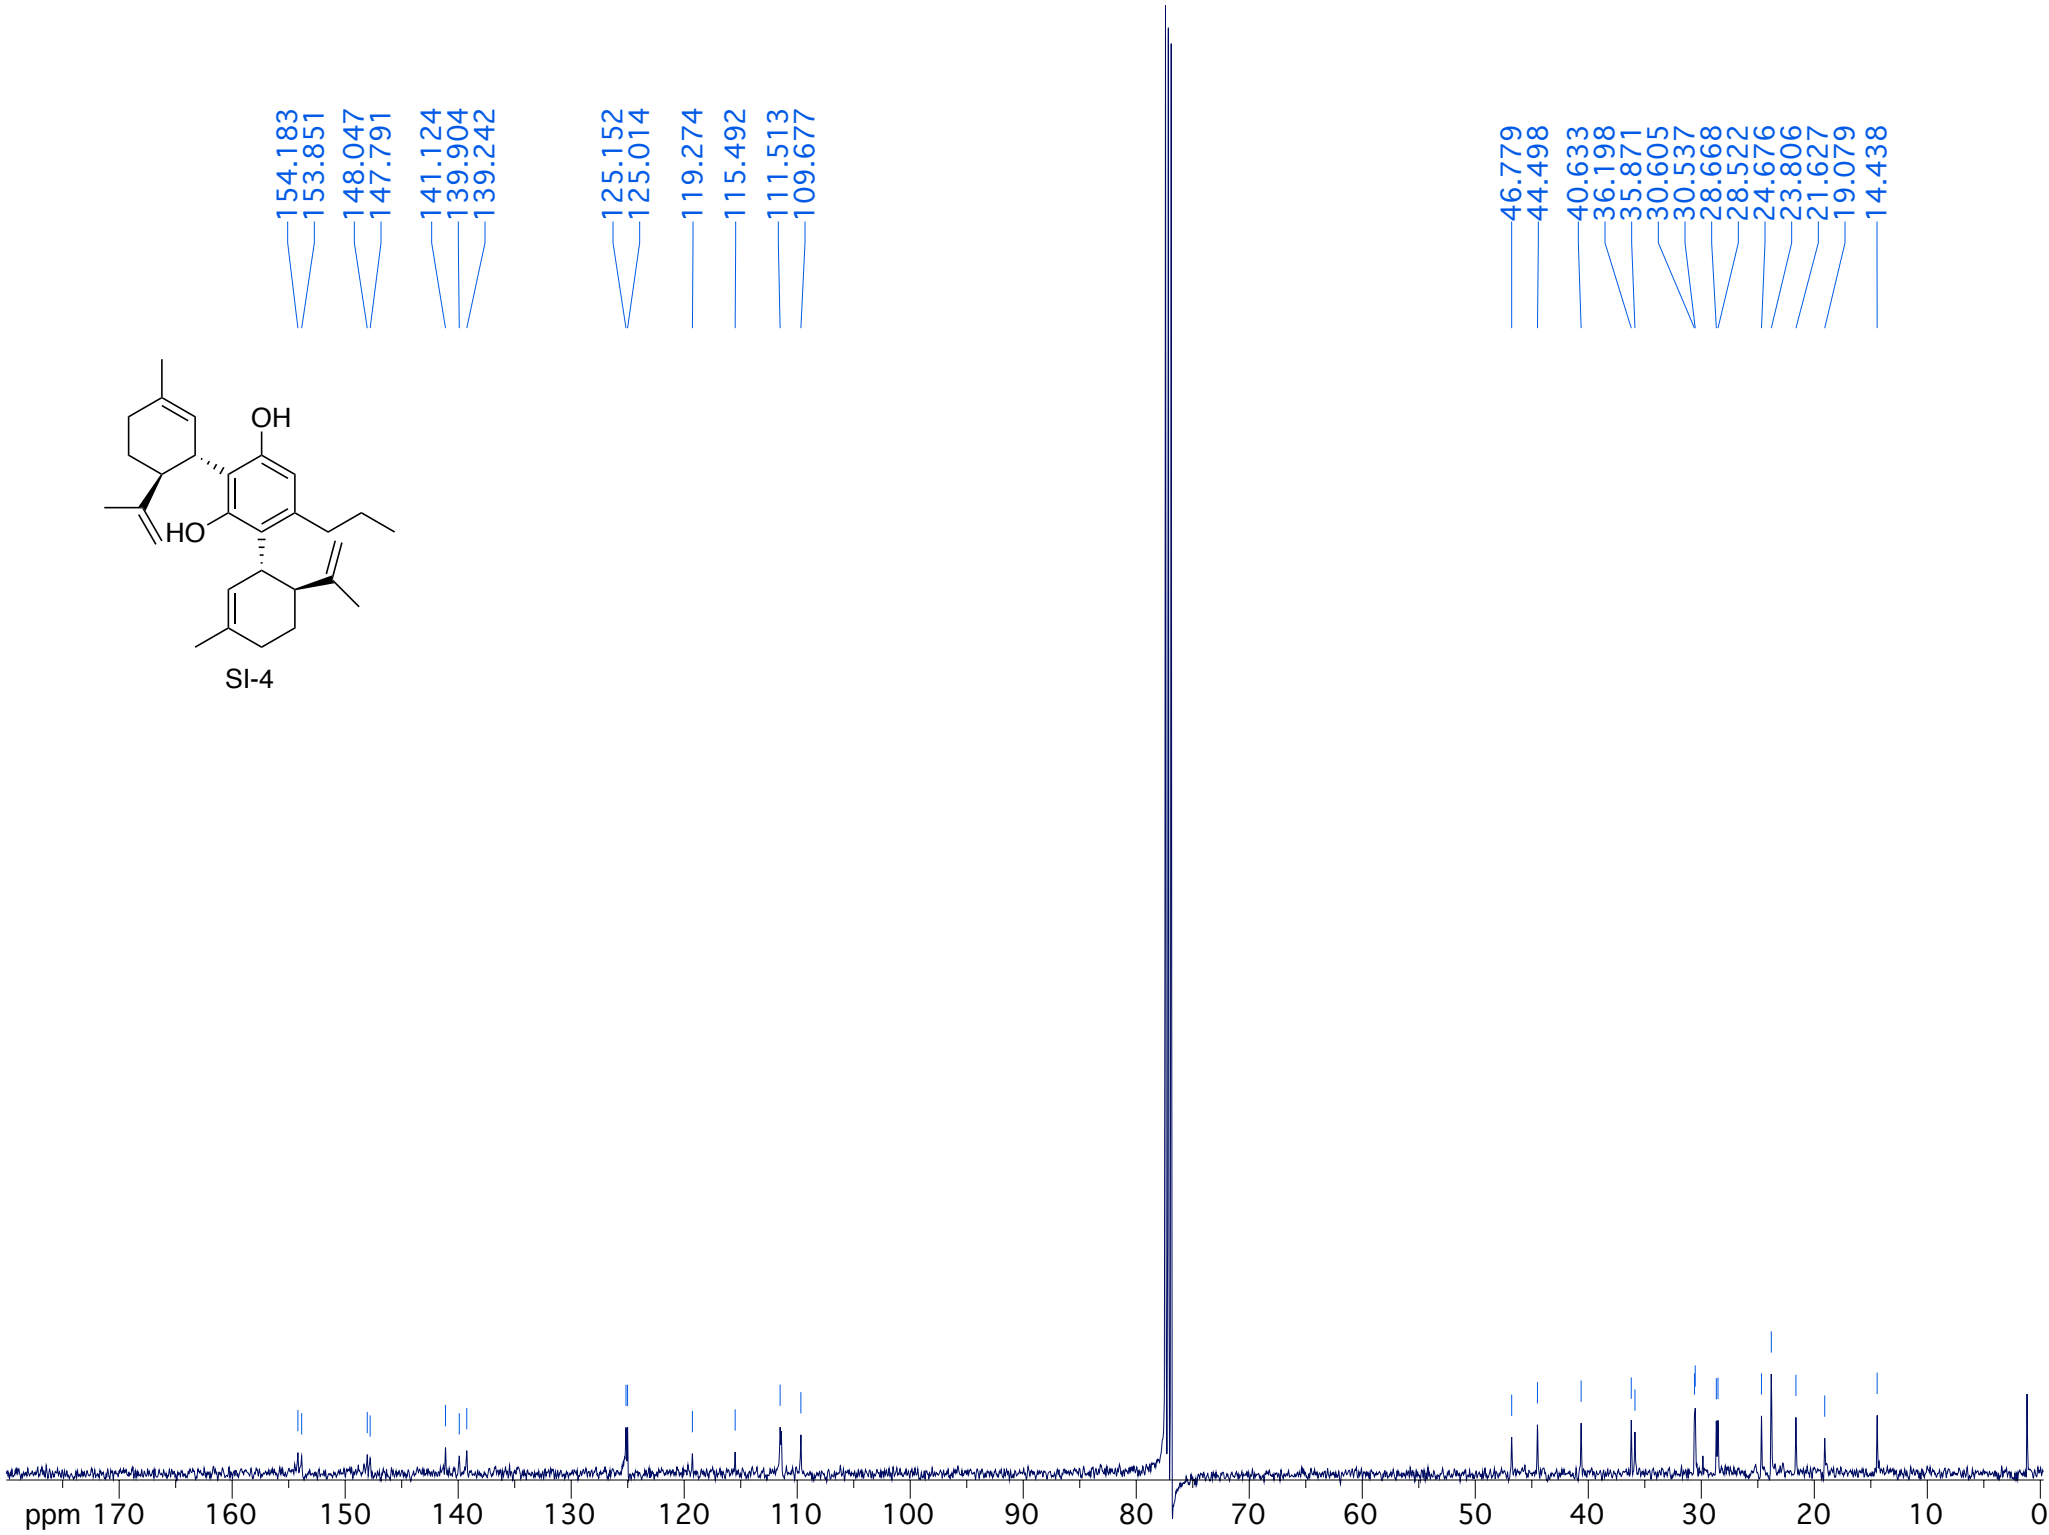

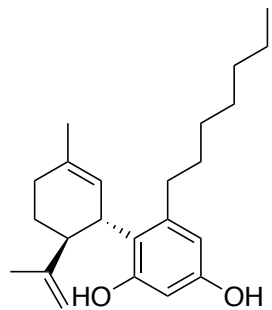

SI-5

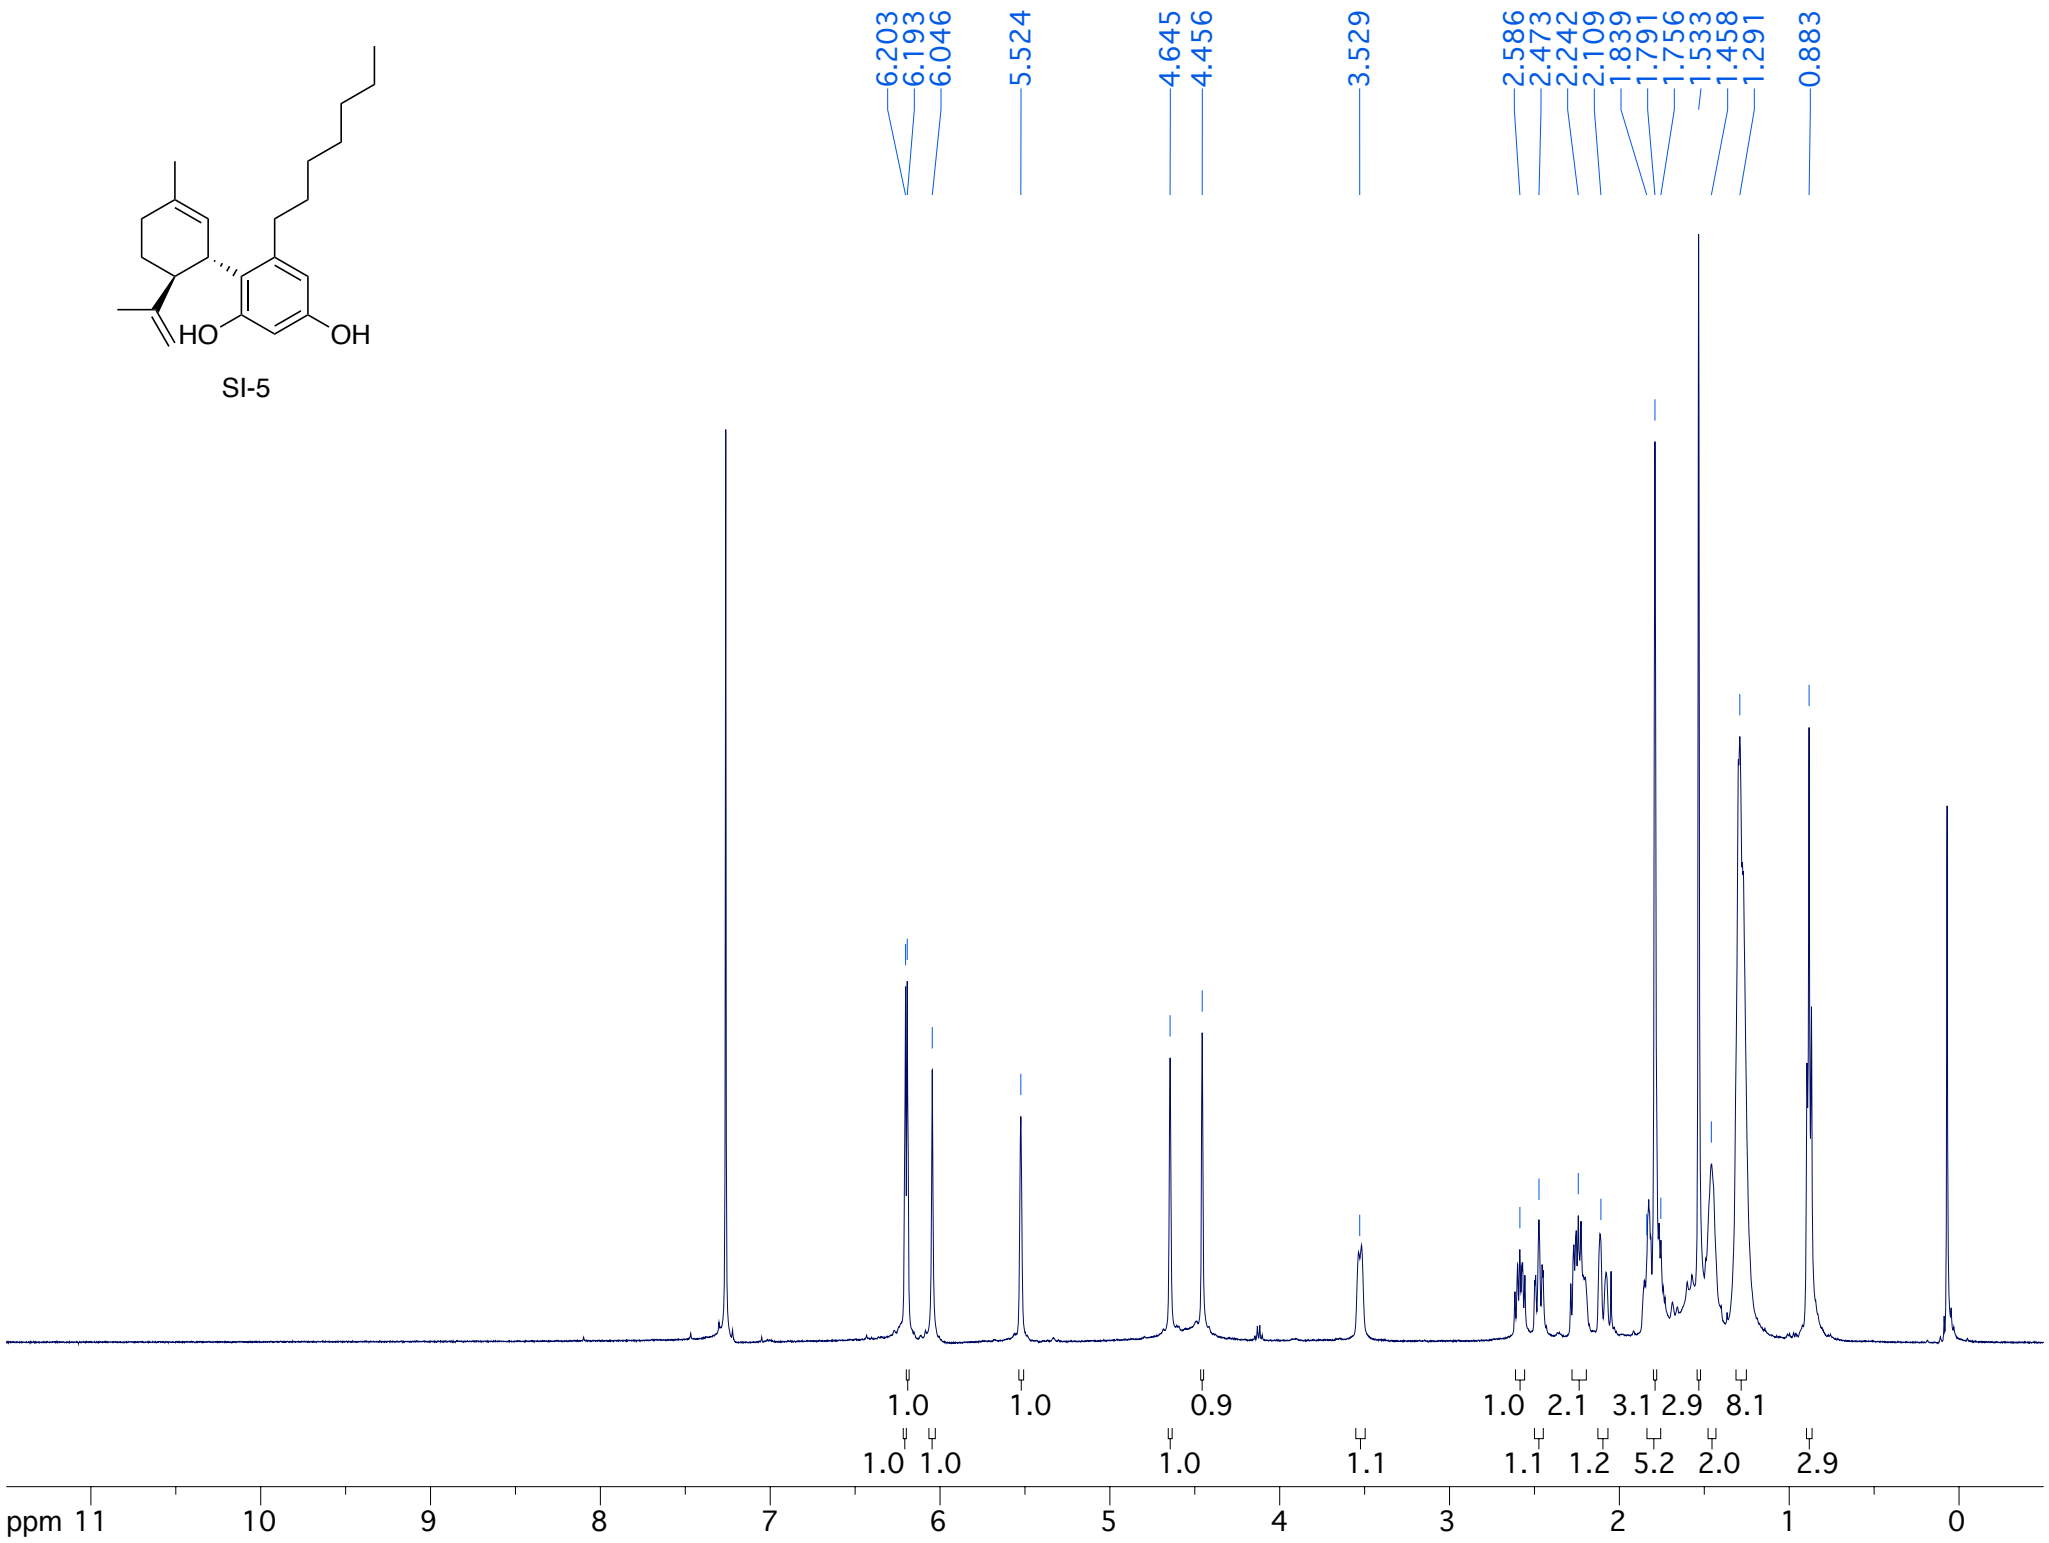

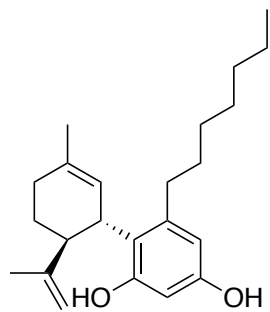

SI-5

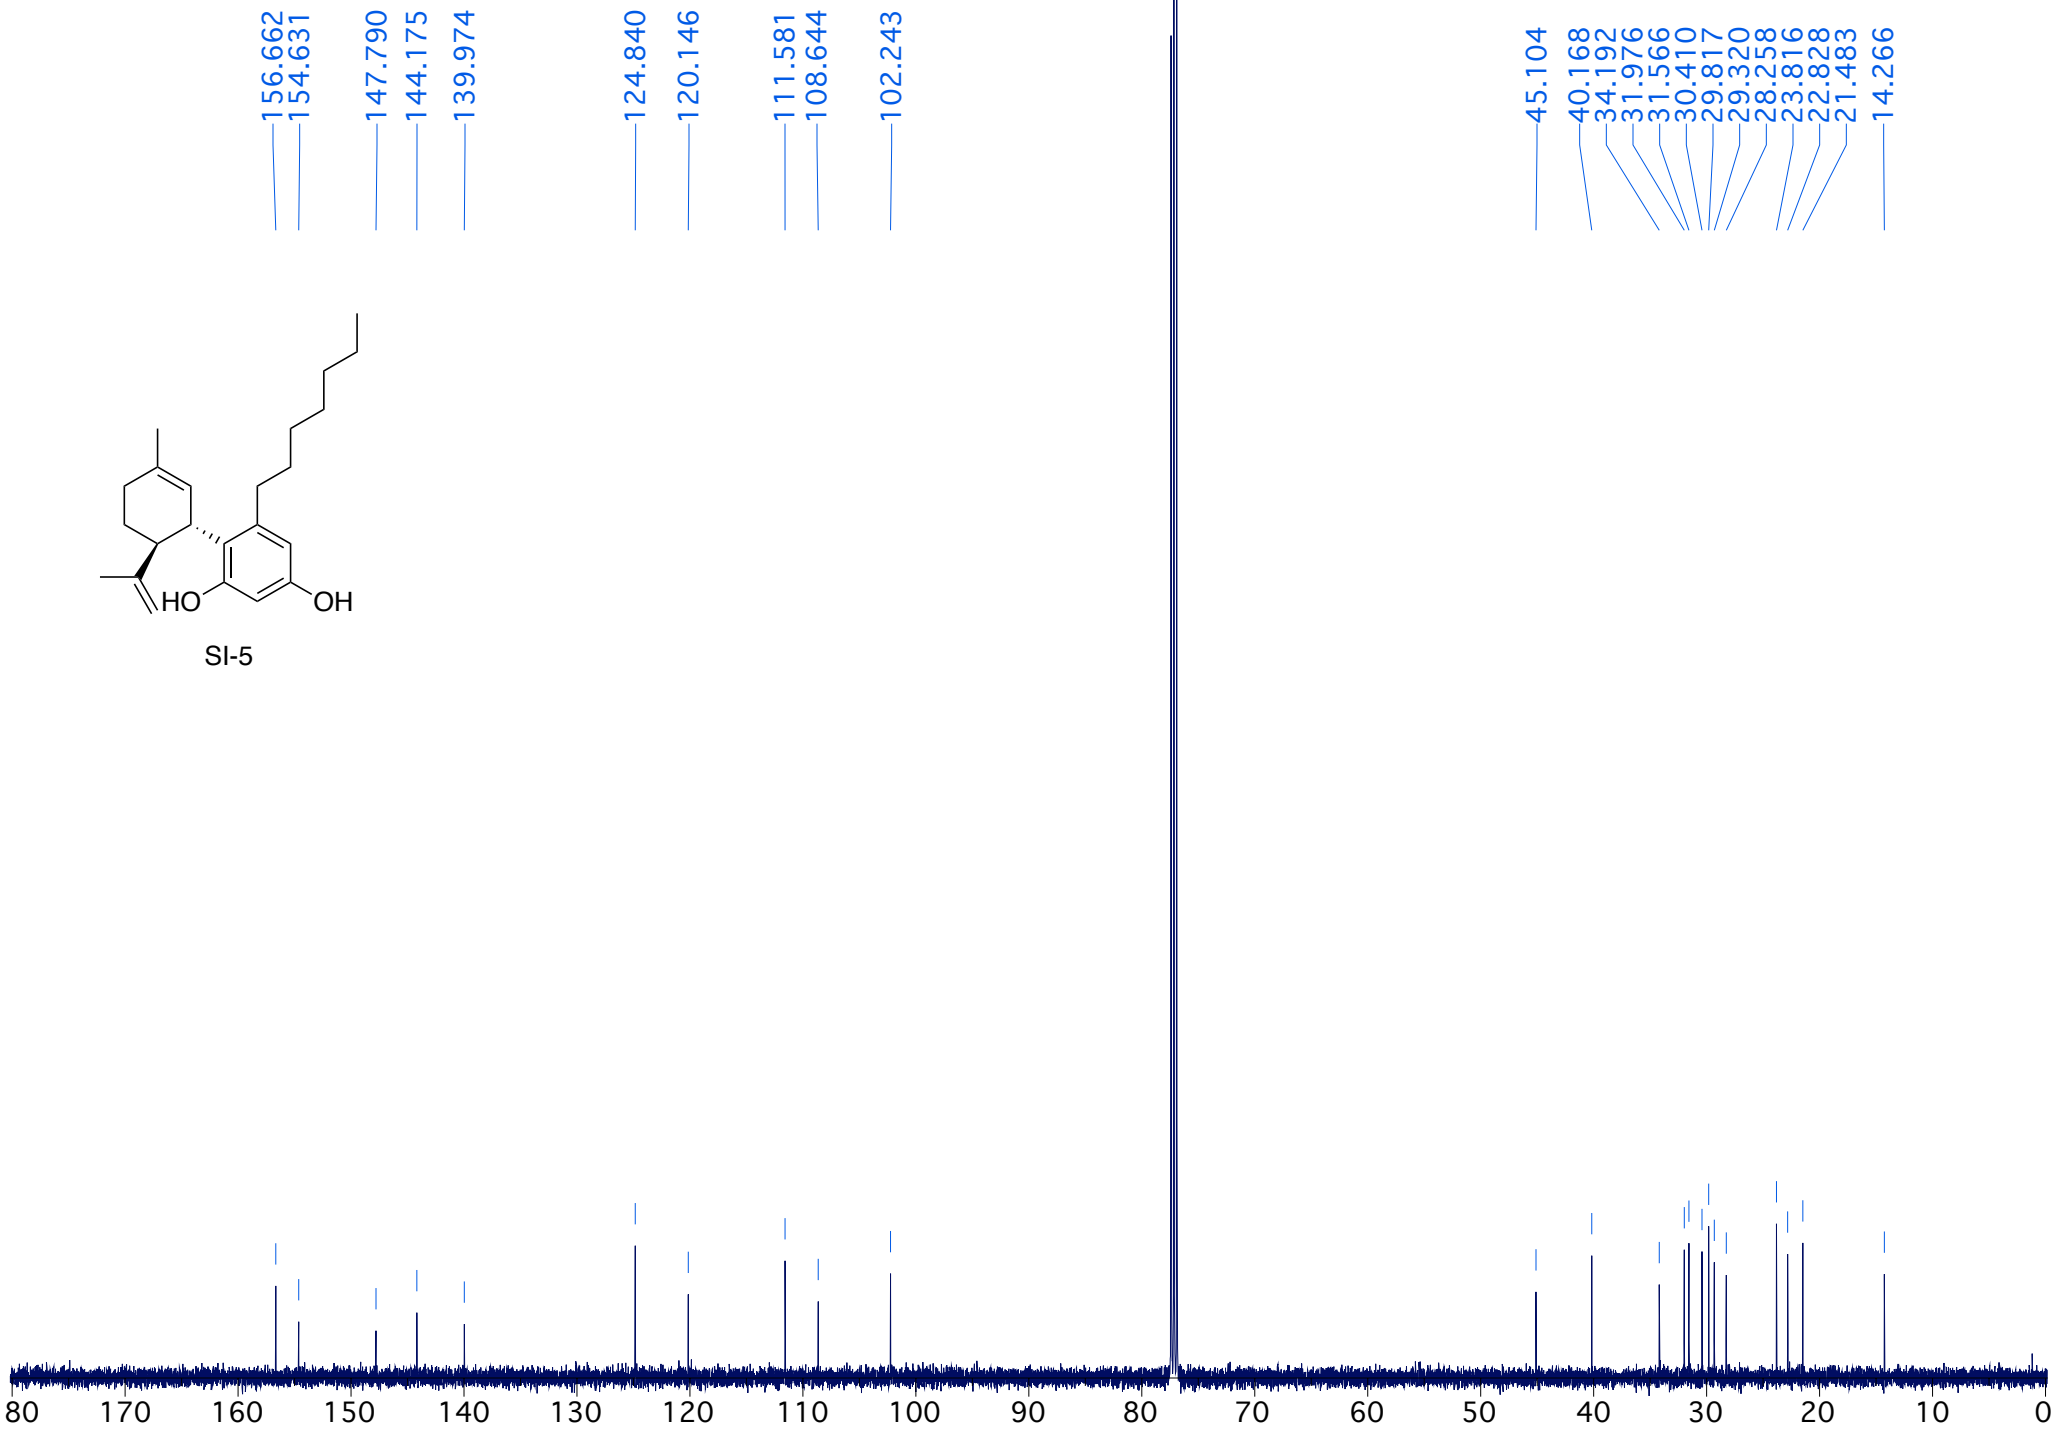



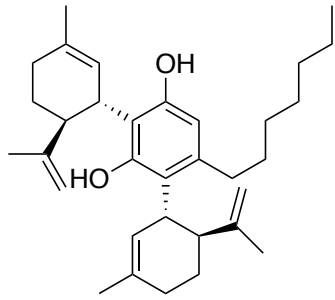

SI-6

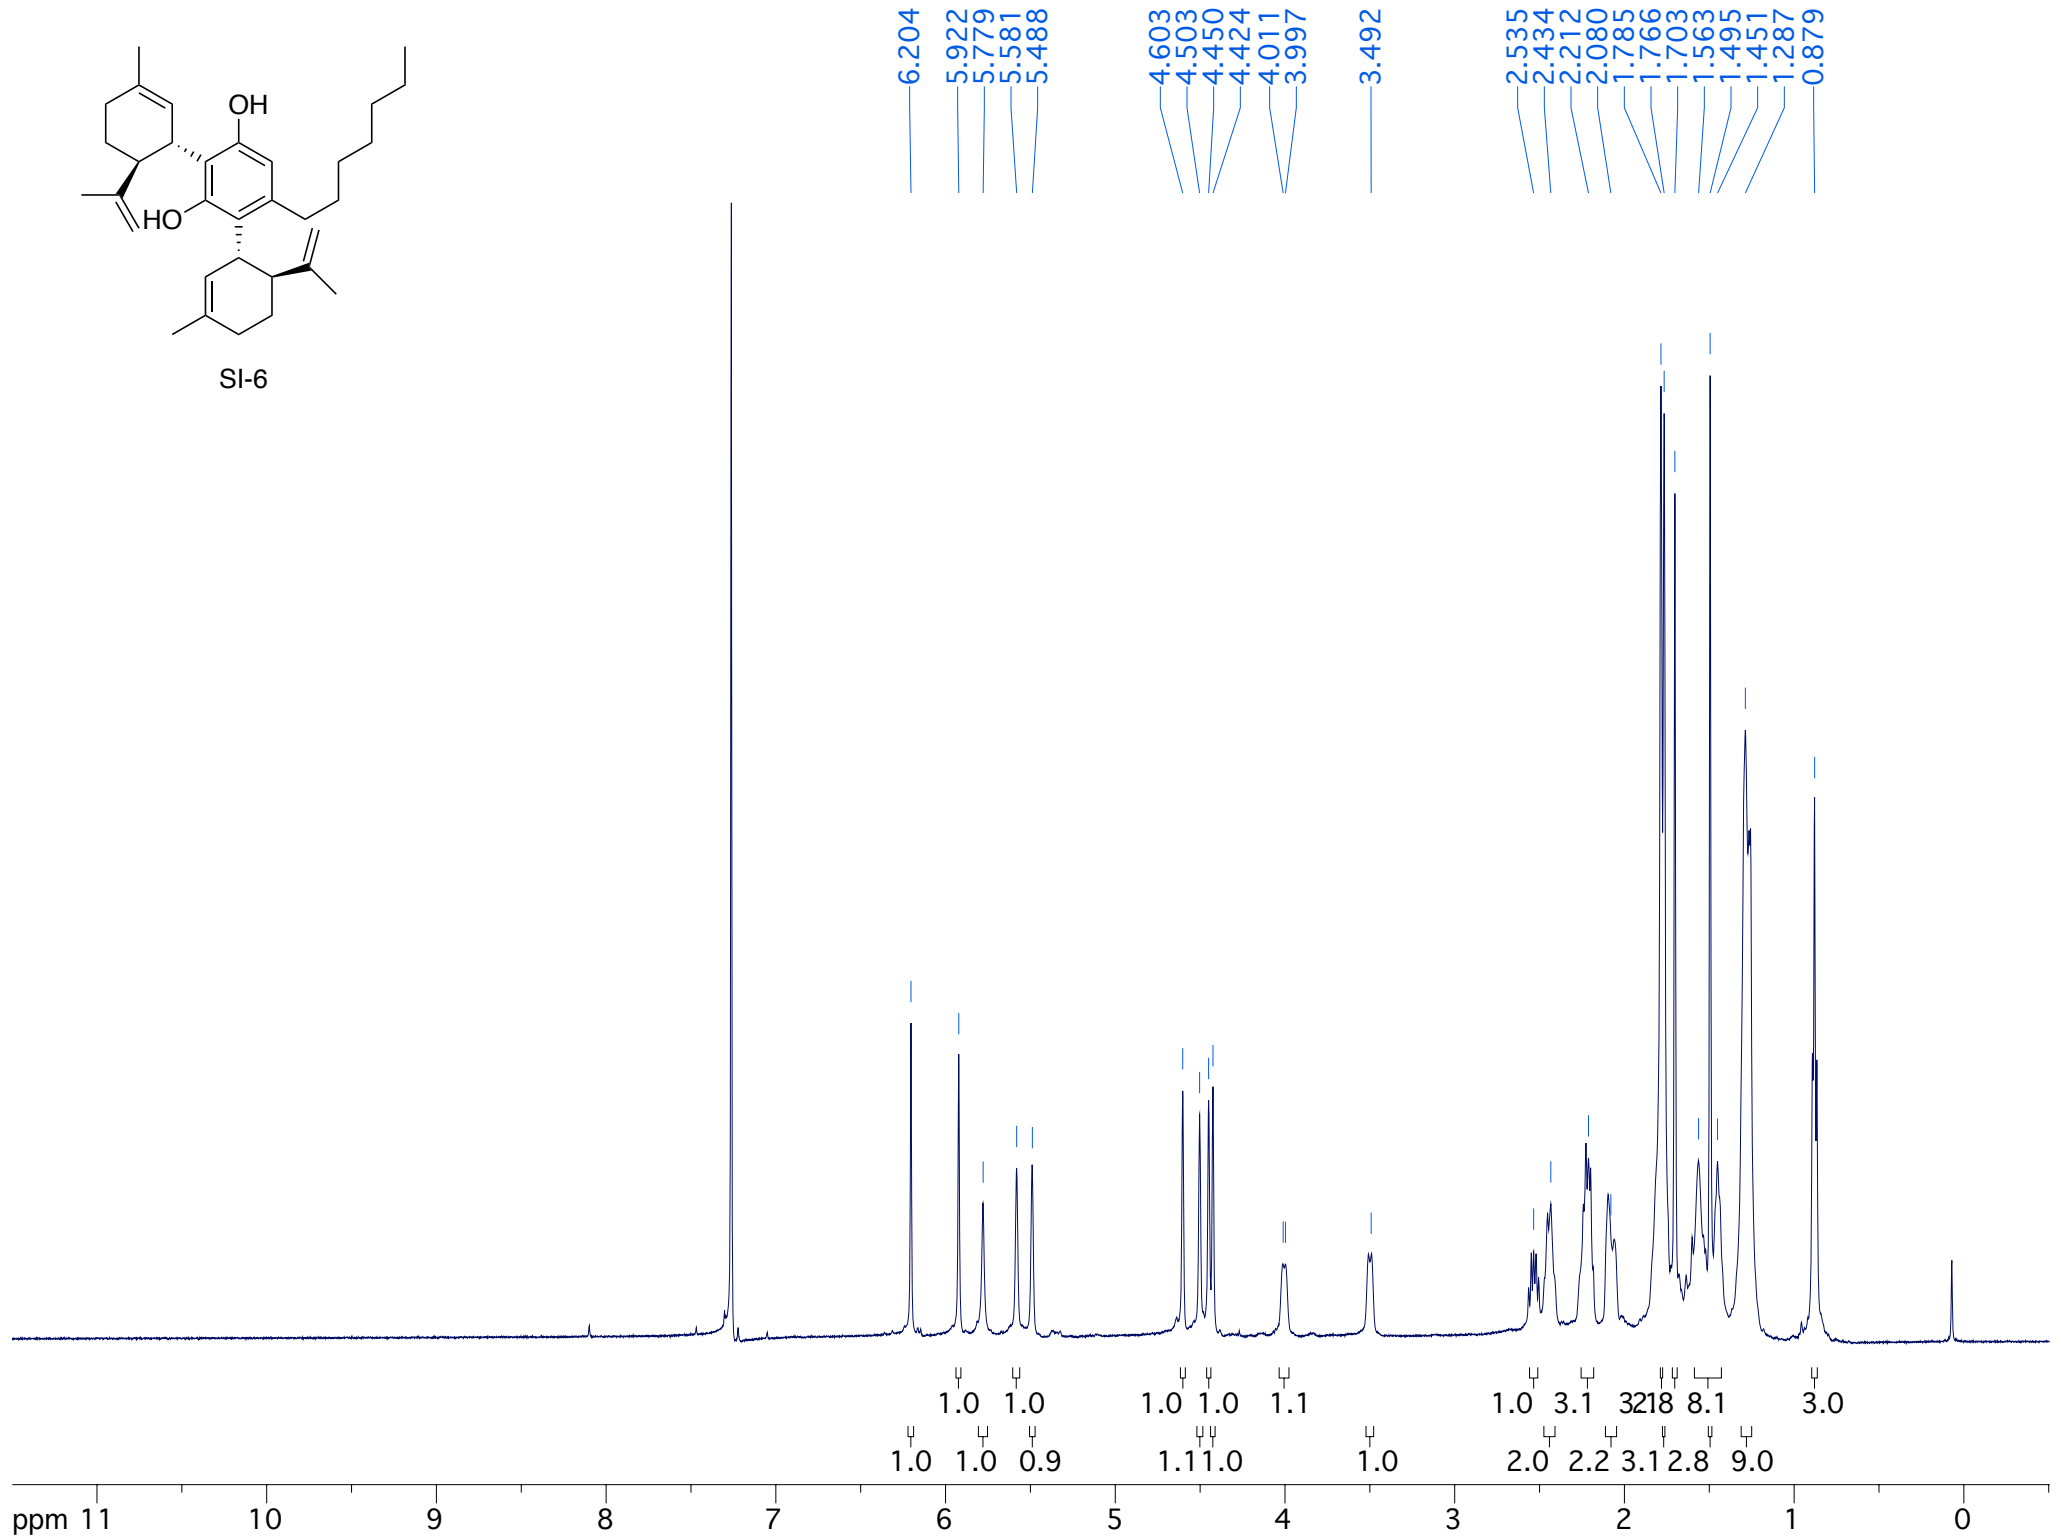

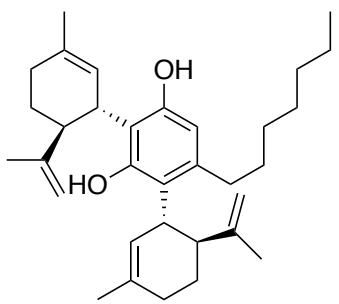

SI-6

154.182  
153.827  
148.038  
147.773  
141.399  
139.896  
139.239

125.129  
124.991  
119.196  
115.422  
111.492  
111.397  
109.572

46.776  
44.481  
40.620  
35.856  
34.100  
31.991  
31.619  
30.600  
30.524  
29.916  
29.337  
28.654  
28.504  
23.846  
23.795  
22.841  
21.650  
19.069  
14.275

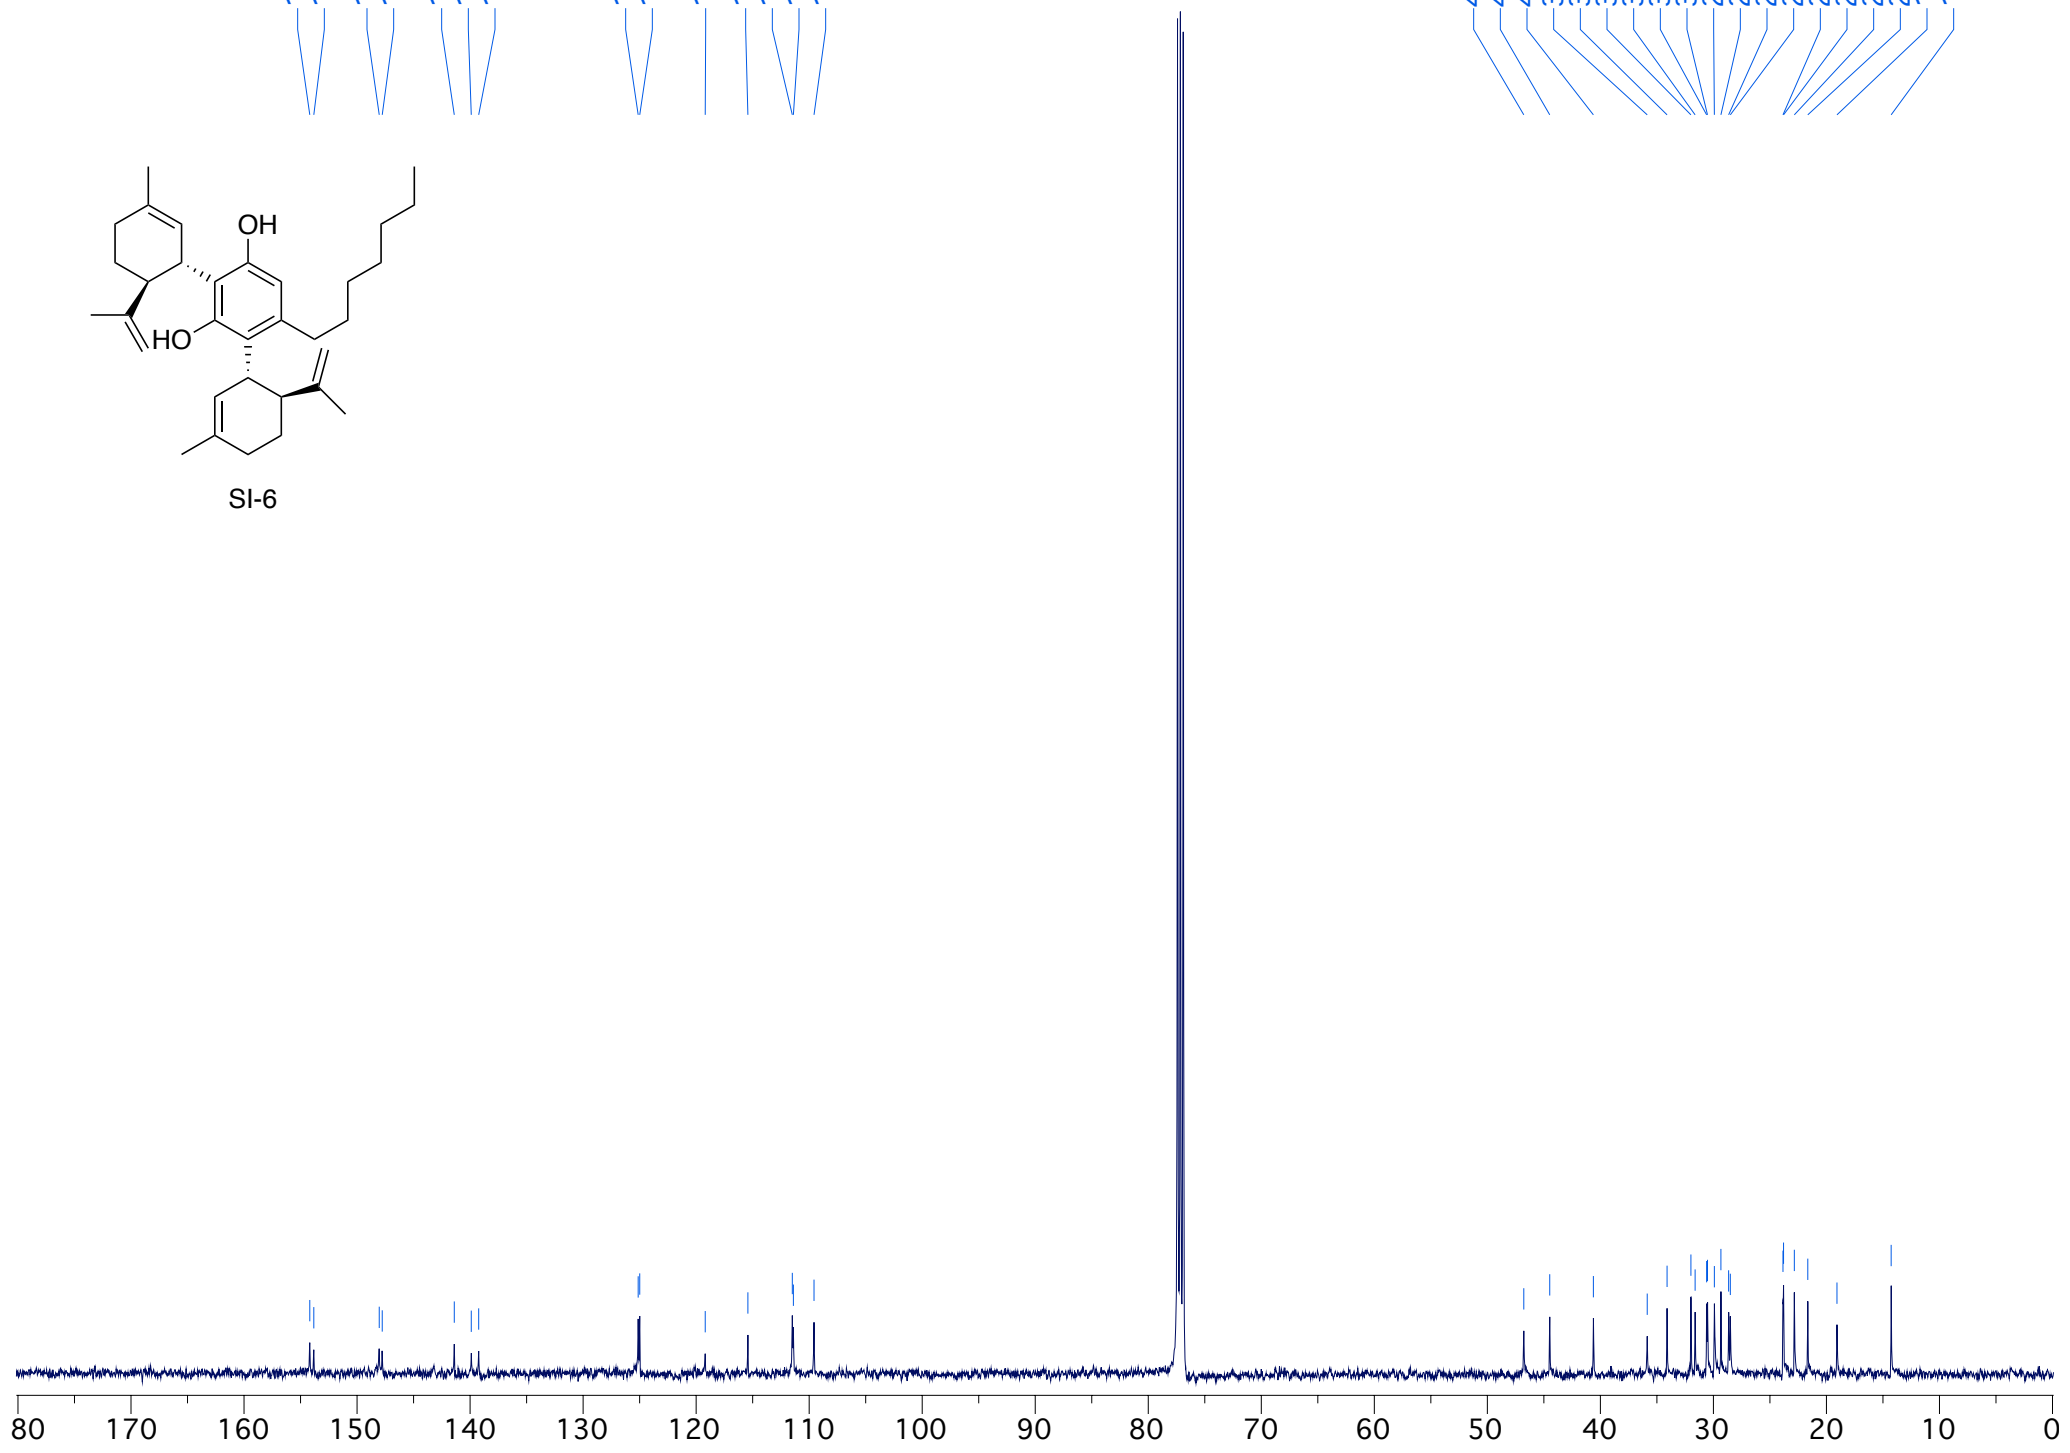

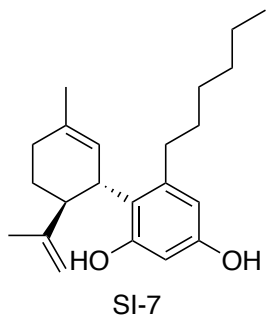

6.201  
6.191  
6.045  
5.522  
4.644  
4.455  
3.522  
2.585  
2.472  
2.254  
2.112  
2.077  
1.831  
1.789  
1.533  
1.457  
1.290  
0.884

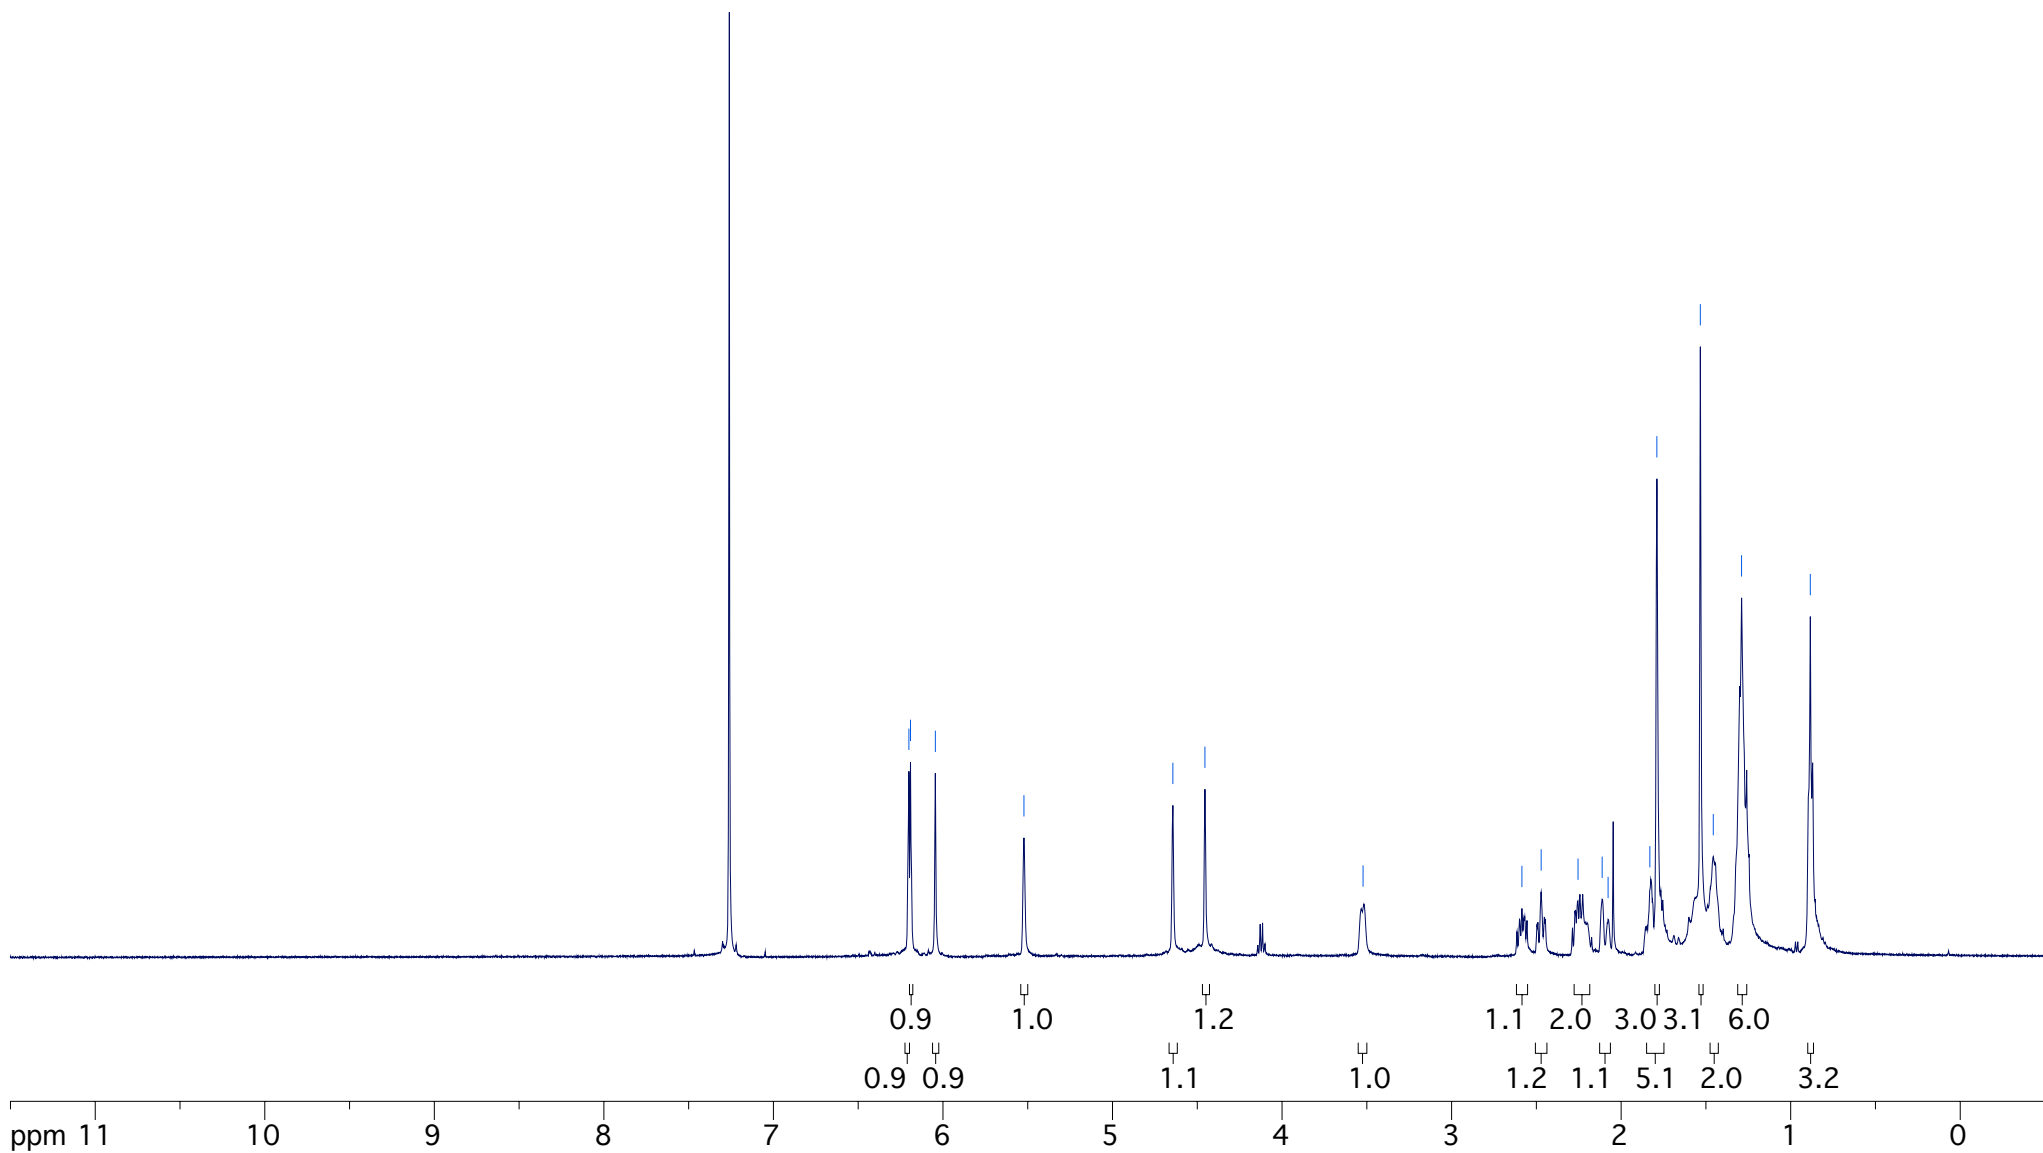

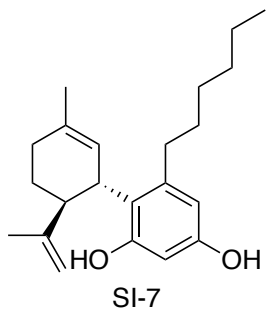

156.641

154.626

147.767

144.141

139.946

124.824

120.116

111.565

108.628

102.231

45.101

40.162

34.197

31.878

31.541

30.405

29.546

28.253

23.814

22.784

21.476

14.252

80 170 160 150 140 130 120 110 100 90 80 70 60 50 40 30 20 10 0



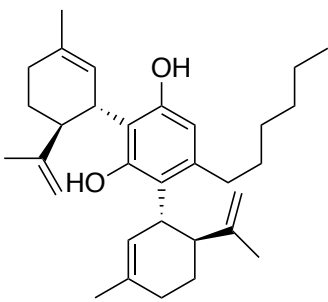

SI-8

154.183  
153.831  
148.032  
147.775  
141.386  
139.890  
139.231

125.123  
124.988  
119.194  
115.421  
111.497  
111.397  
109.566

46.774  
44.482  
40.614  
35.857  
34.112  
31.904  
31.601  
30.600  
30.522  
29.655  
28.651  
28.496  
23.848  
23.795  
22.801  
21.646  
19.064  
14.267

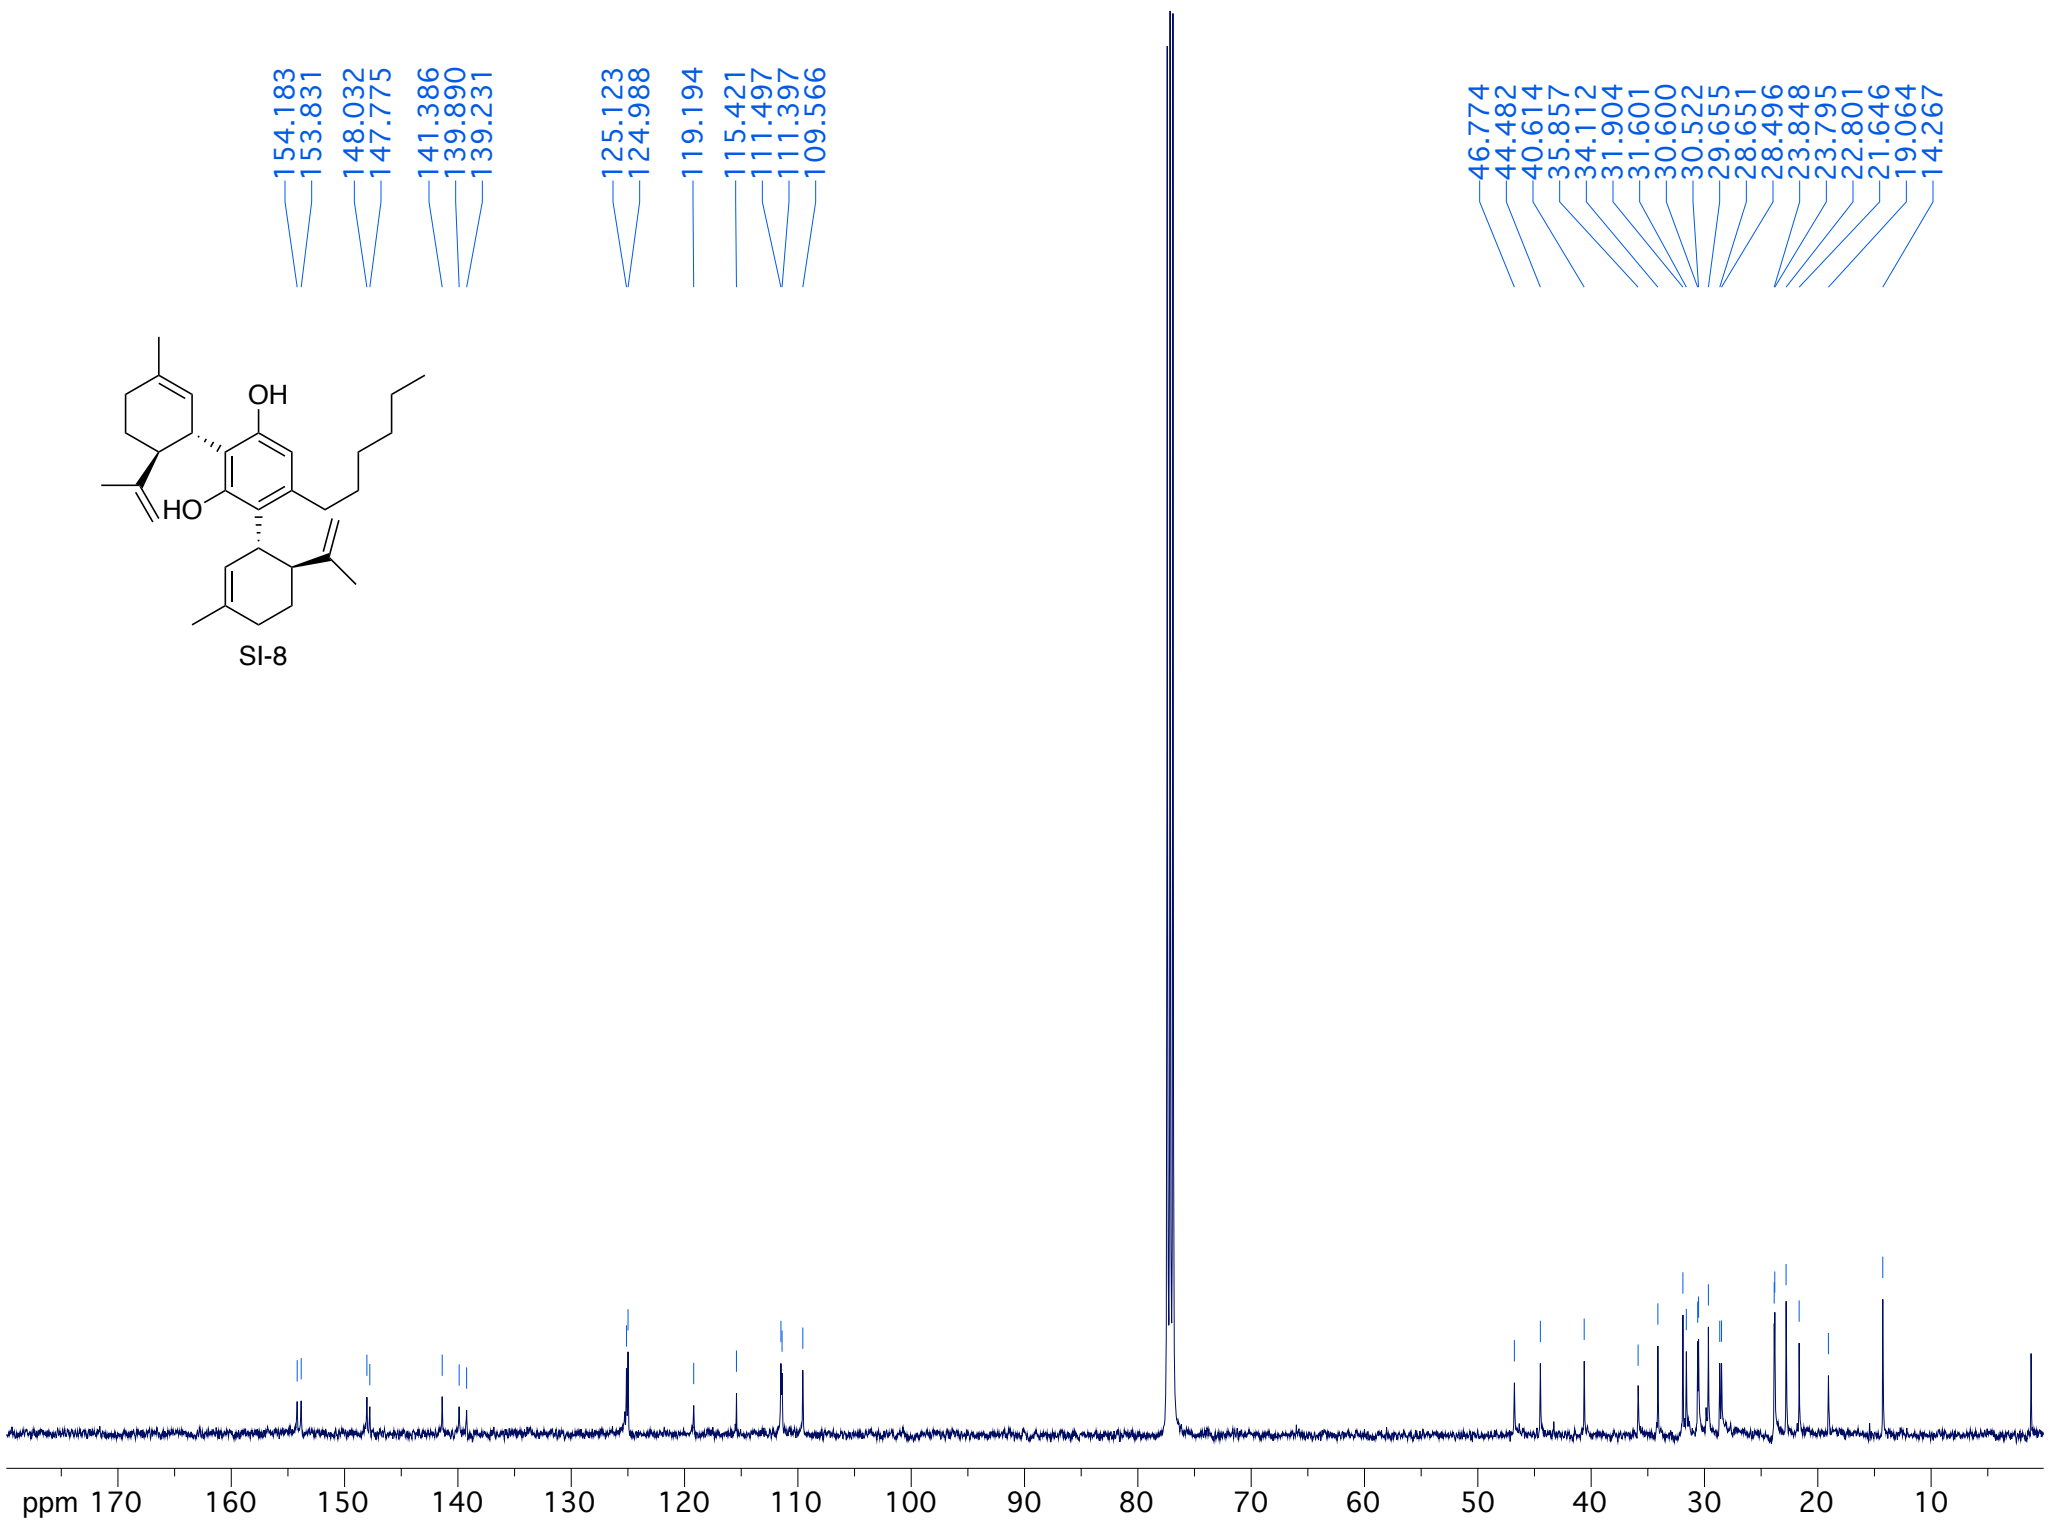

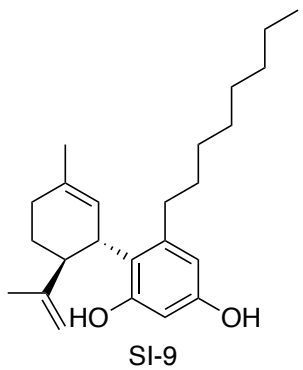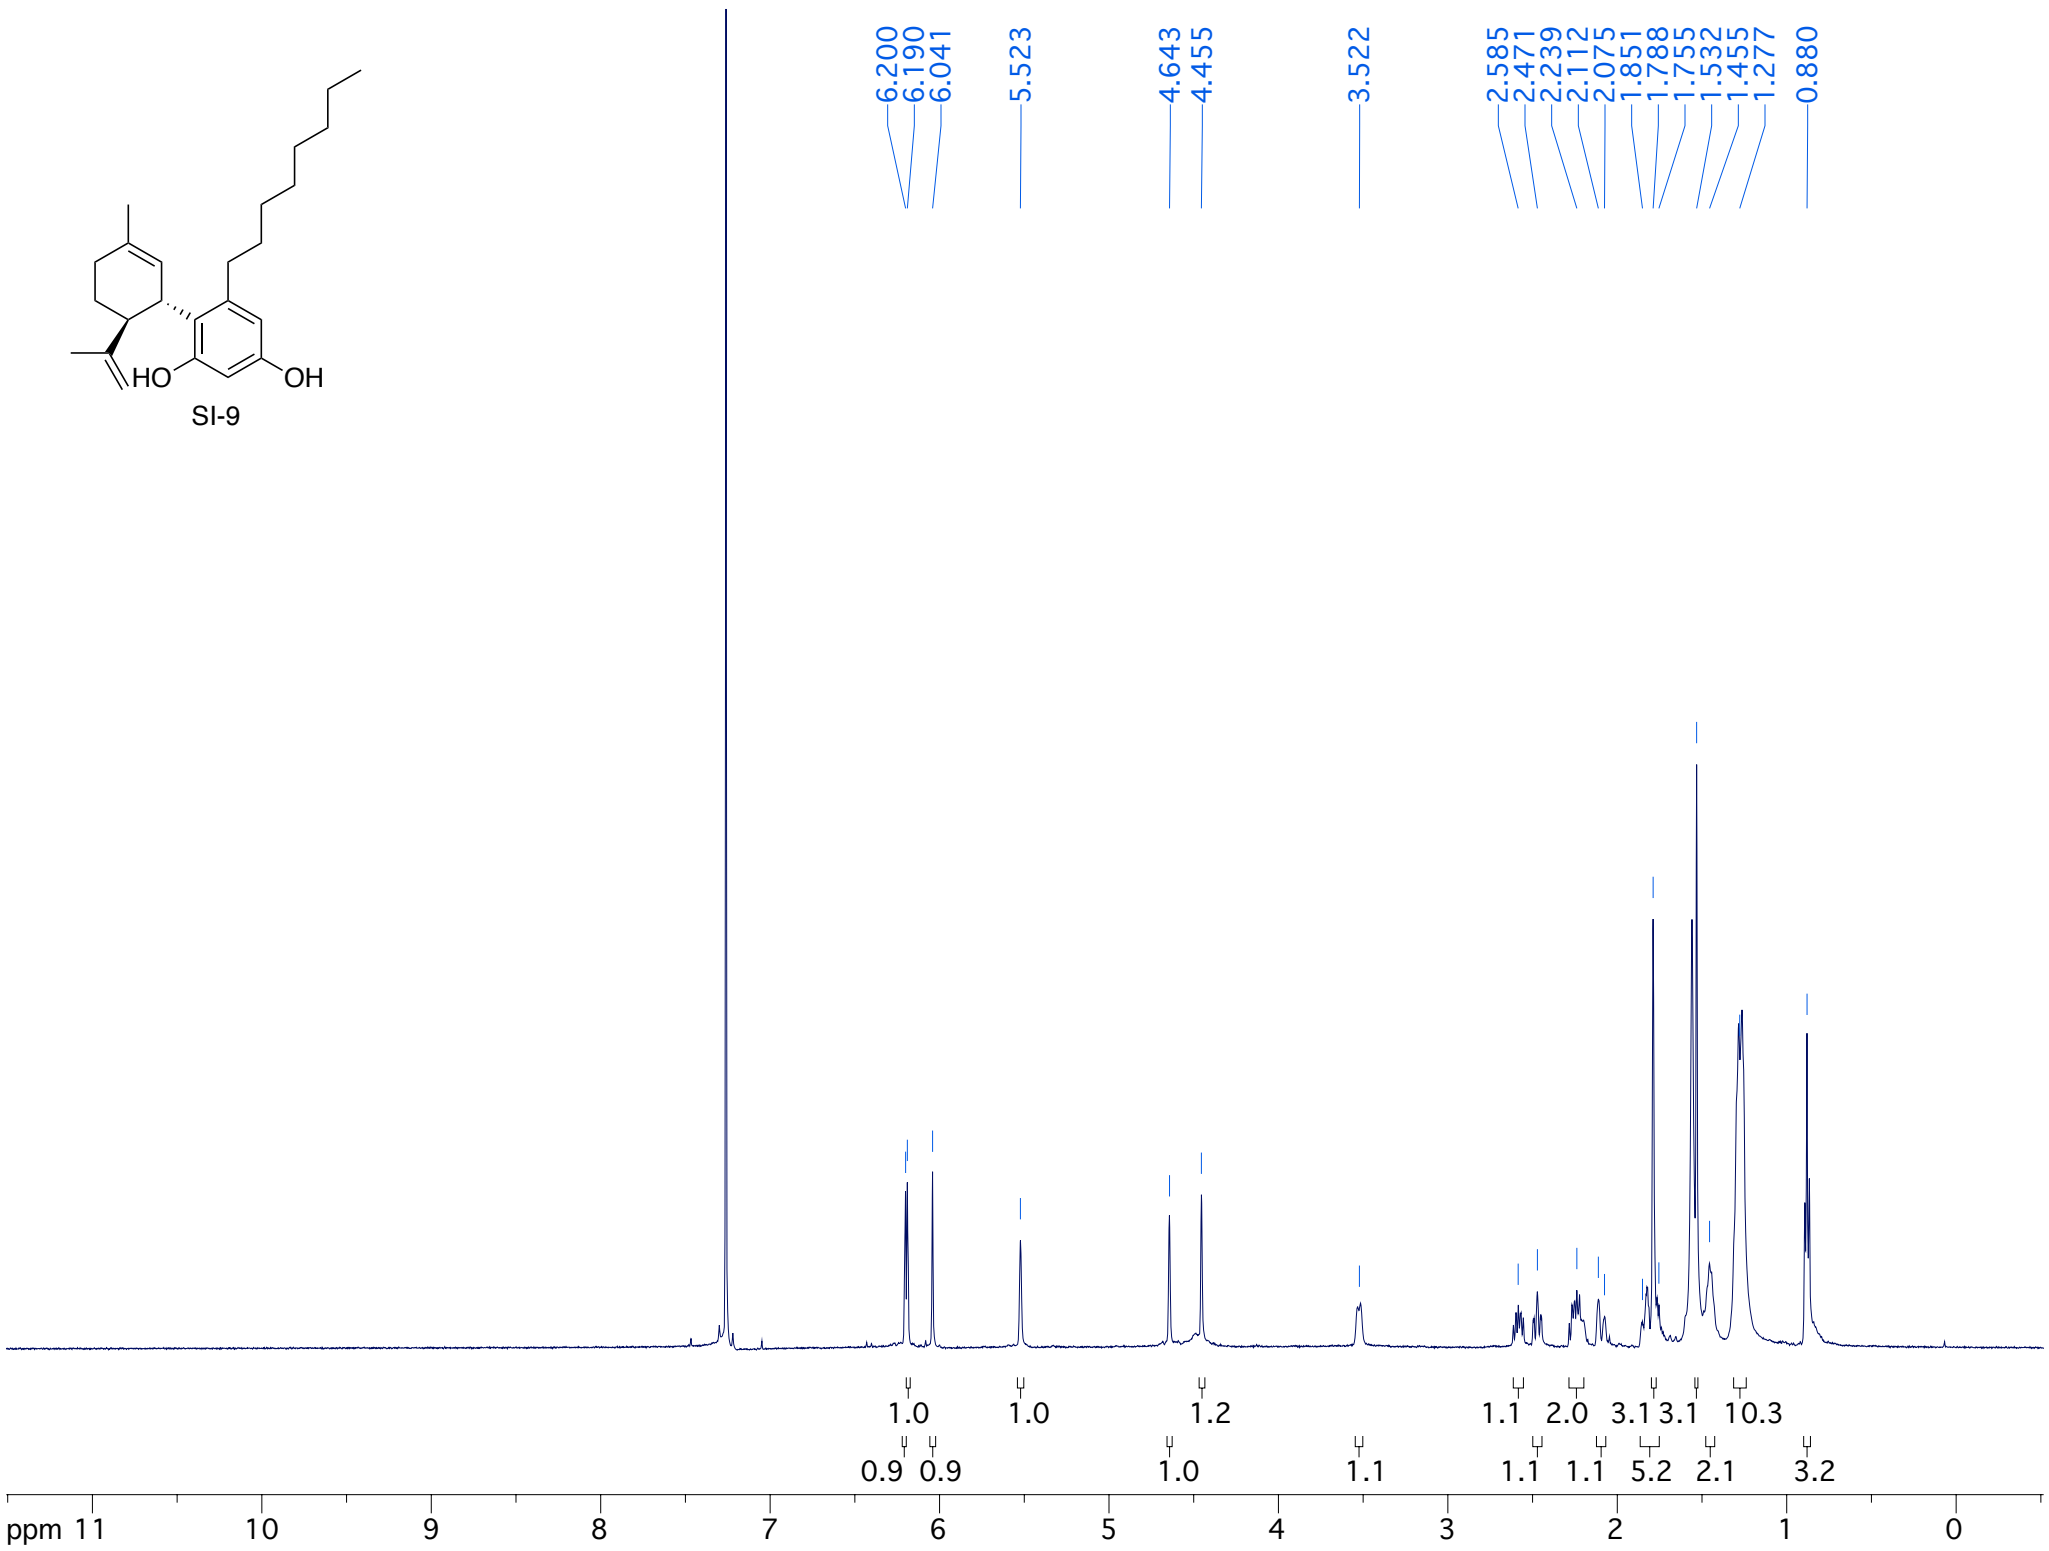

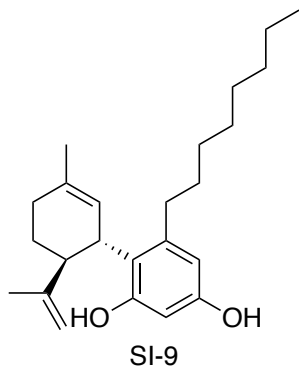

156.634

154.677

147.793

144.161

139.951

124.848

120.096

111.568

108.667

102.246

45.096

40.167

34.193

32.036

31.559

30.404

29.842

29.603

29.407

28.258

23.807

22.834

21.480

14.261

ppm 170 160 150 140 130 120 110 100 90 80 70 60 50 40 30 20 10 0



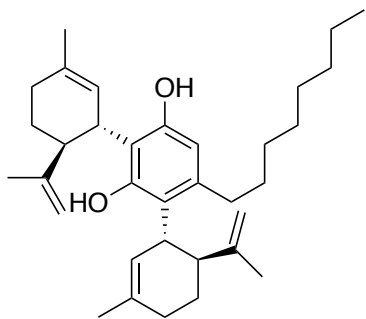

SI-10

6.202  
5.920  
5.779  
5.580  
5.488  
4.600  
4.501  
4.449  
4.423  
4.011  
3.994  
3.506  
3.487  
2.562  
2.547  
2.533  
2.519  
2.503  
2.470  
2.426  
2.239  
2.180  
2.095  
2.056  
1.782  
1.764  
1.702  
1.494  
1.450  
1.279  
1.261  
0.891  
0.878  
0.864

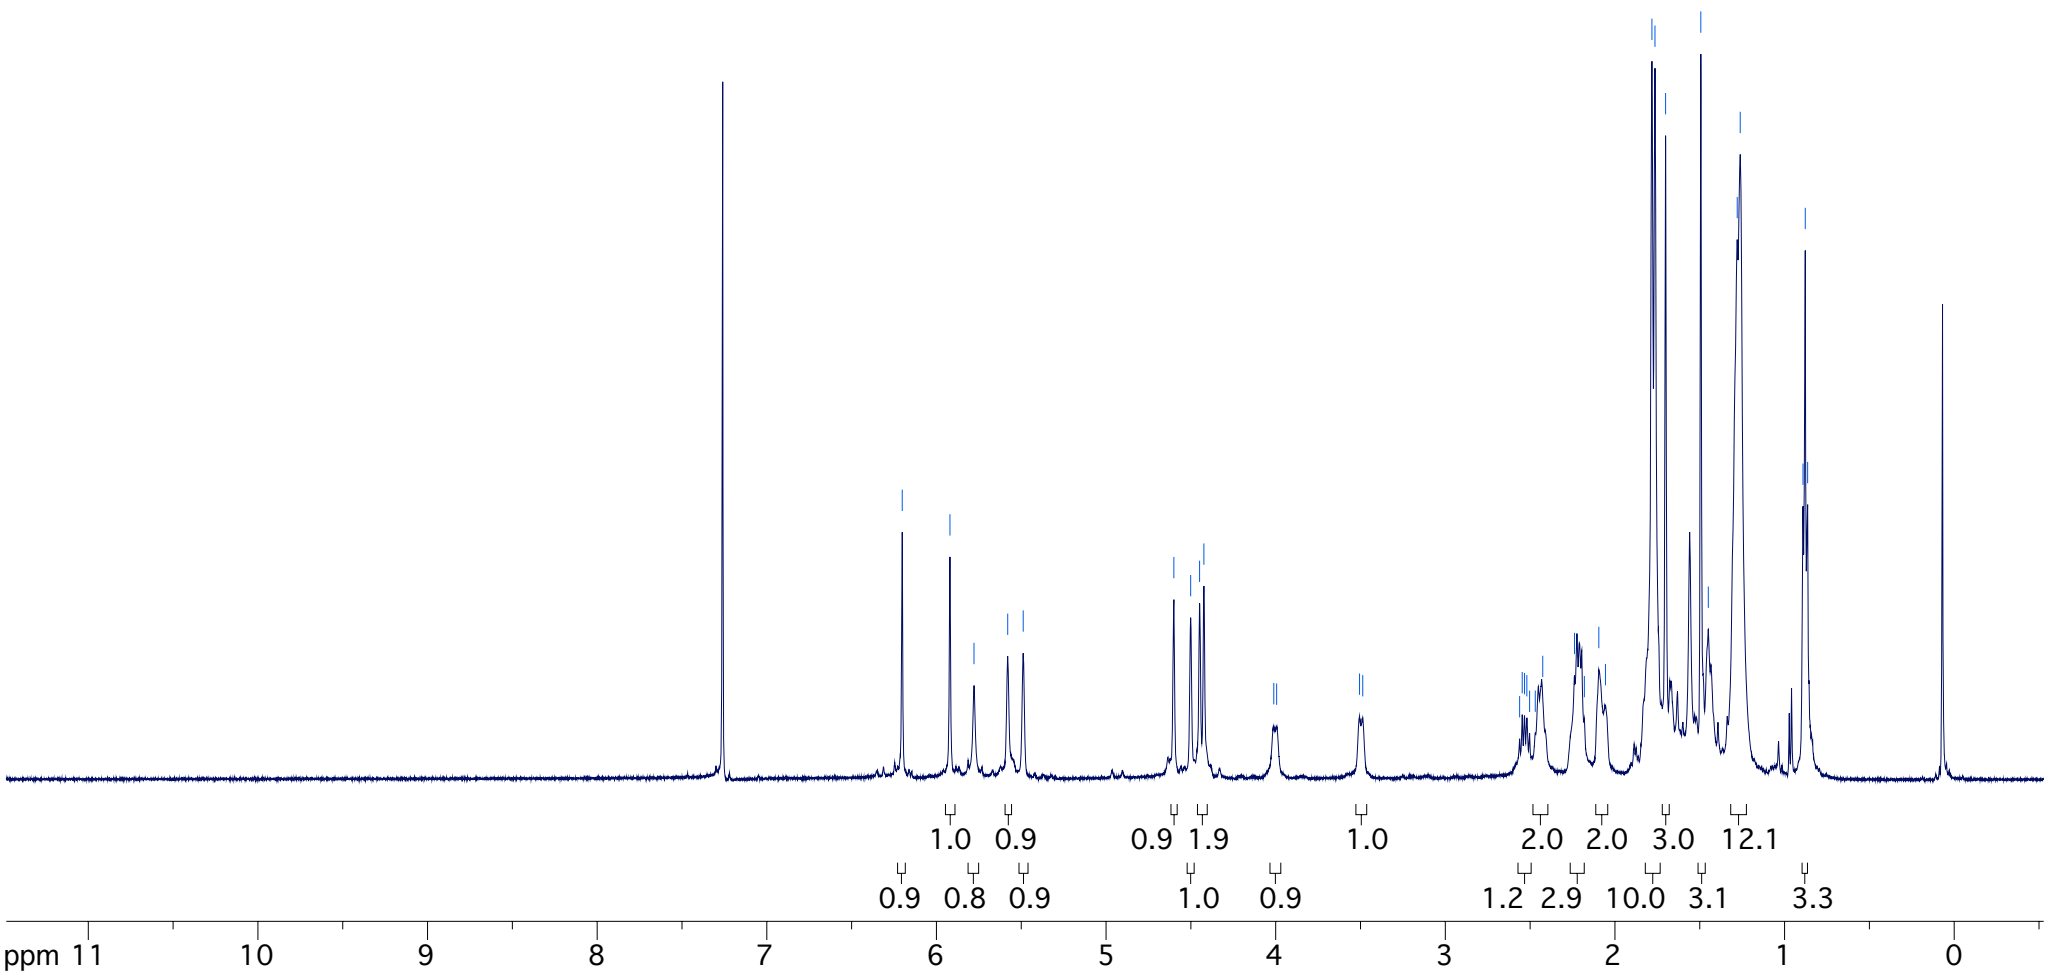

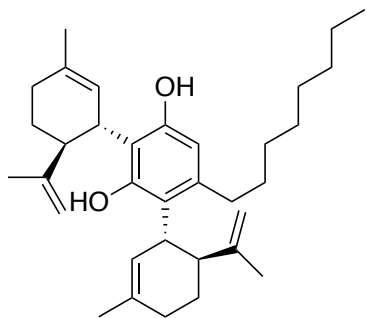

SI-10

154.160  
153.813  
148.017  
147.756  
141.382  
139.877  
139.211

125.112  
124.975  
119.176  
115.407  
111.477  
111.384  
109.564

46.769  
44.472  
40.615  
35.851  
34.101  
32.051  
31.604  
30.593  
30.519  
30.935  
29.617  
29.419  
28.649  
28.500  
23.839  
23.789  
22.844  
21.650  
19.061  
14.266

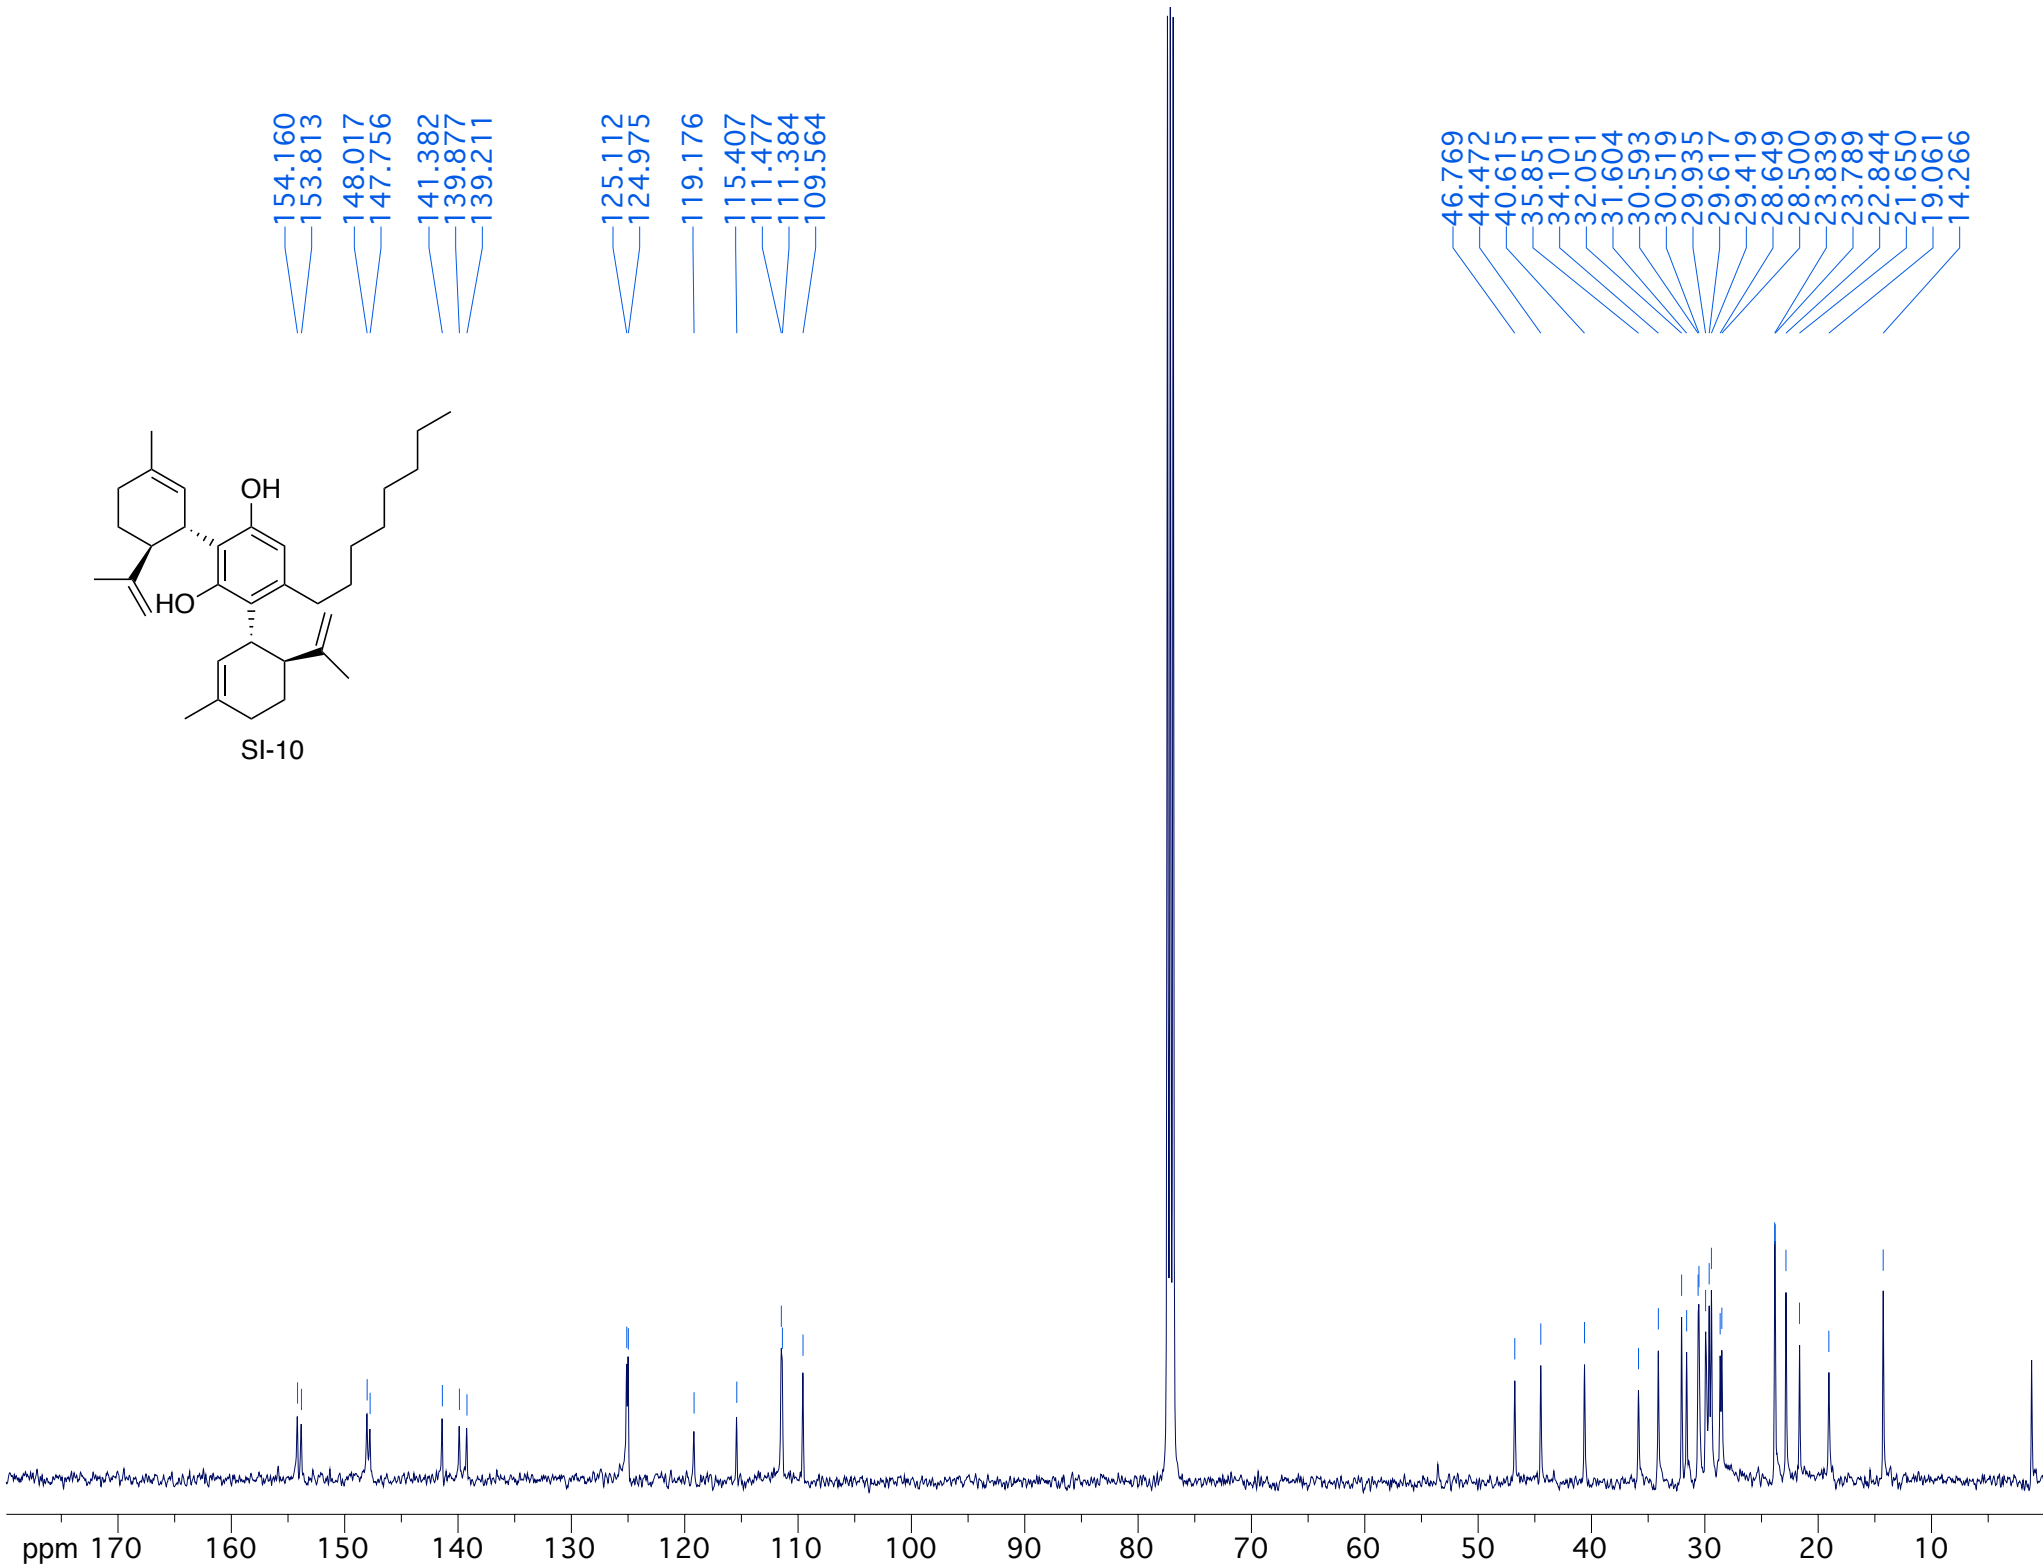

Supplement: NIHMS1672821-supplement-1.pdf [file NIHMS1672821-supplement-1.pdf]
